# Supplementary material
Source: PubMed Central journal article supplement (PMC9357291)
Supplement: NIHMS1825618-supplement-supporting_information.pdf [file NIHMS1825618-supplement-supporting_information.pdf]

# Supporting information for Review of SARS-CoV-2 main protease inhibitors

Kaifu Gao<sup>1</sup>, Rui Wang<sup>1</sup>, Jiahui Chen<sup>1</sup>, Faqing Huang<sup>2</sup>, and Guo-Wei Wei<sup>1,3,4\*</sup>

<sup>1</sup> Department of Mathematics,

Michigan State University, MI 48824, USA.

<sup>2</sup> Department of Chemistry and Biochemistry,

University of Southern Mississippi, Hattiesburg, MS, 39406, USA

<sup>3</sup> Department of Electrical and Computer Engineering,

Michigan State University, MI 48824, USA.

<sup>4</sup> Department of Biochemistry and Molecular Biology,

Michigan State University, MI 48824, USA.

February 22, 2021

---

\*Corresponding author. Email: wei@math.msu.edu

# 1 Summary of SARS-CoV-2 or SARS-CoV Mpro inhibitors

In this section, we provide a collection of 701 SARS-CoV-2 and SARS-CoV inhibitors published in the literature or databases. Compound SMILES strings, potency values, PDB IDs, and references are given.

| SMILES string                                                                                                                          | SARS-CoV-2<br>IC50 ( $\mu\text{M}$ ) | SARS-CoV<br>IC50 ( $\mu\text{M}$ ) | SARS-CoV-2<br>$K_i$ ( $\mu\text{M}$ ) | SARS-CoV<br>$K_i$ ( $\mu\text{M}$ ) | PDB ID   | Compound<br>name |
|----------------------------------------------------------------------------------------------------------------------------------------|--------------------------------------|------------------------------------|---------------------------------------|-------------------------------------|----------|------------------|
| <chem>COC1=CC=CC2=C1C=C(N2)C(=O)N<br/>C(CC(C)O)C(=O)NC(CC1CCNC1=O)<br/>C(=O)CO</chem>                                                  | 0.00027 [1]                          | 0.004 [1]                          |                                       |                                     | 6xhm [1] |                  |
| <chem>CC(C)C[C@@H](NC(=O)[C@H](NC<br/>(=O)COC1=CC=CC(=C1)N(C)C(C)<br/>C)C)C(=O)N[C@H](C[C@H]1CCNC<br/>1=O)C(=O)c1nc2=CC=CC=c2s1</chem> |                                      |                                    |                                       | 0.003 [2]                           |          |                  |
| <chem>CC(C)C[C@@H](NC(=O)[C@H](NC<br/>(=O)OCC1=CC=CC(=C1)C(C)C(=O)<br/>N[C@H](C[C@H]1CCNC1=O)C(=O)<br/>c1nc2=CC=CC=c2s1</chem>         |                                      | 1.7 [2]                            |                                       | 0.0041 [2]                          |          |                  |
| <chem>COC1=C2C=C(NC2=CC=C1)C(=O)N<br/>[C@@H](CC(C)C)C(=O)N[C@@H](<br/>C[C@@H]1CCNC1=O)C(=O)c1nc2c<br/>cccc2s1</chem>                   |                                      |                                    |                                       | 0.0063 [3]                          |          |                  |
| <chem>COC1=CC=CC2=C1C=C(N2)C(=O)N<br/>C(CC(C)C)C(=O)NC(CC1CCNC<br/>1=O)C(=O)CO</chem>                                                  |                                      | 0.007 [1]                          |                                       |                                     |          |                  |
| <chem>O=C(On1nc2ccccc21)c1ccc2[n<br/>H]ccc2c1</chem>                                                                                   |                                      |                                    |                                       | 0.0075 [4]                          |          |                  |
| <chem>CC(C)C[C@@H](NC(=O)[C@H](NC<br/>(=O)COC1=CC=C(O)C=C1)C(C)C<br/>(=O)N[C@H](C[C@H]1CCNC1=O)C<br/>(=O)c1nc2=CC=CC=c2s1</chem>       |                                      | 1.2 [2]                            |                                       | 0.011 [2]                           |          |                  |
| <chem>CCN(CC)C1=CC=C(C=C1)C(=O)ON<br/>1N=NC2=CC=CC=C12</chem>                                                                          |                                      |                                    |                                       | 0.0111 [4]                          |          |                  |
| <chem>CNC1=CC=C(C=C1)C(=O)ON1N=NC<br/>2=CC=CC=C12</chem>                                                                               |                                      |                                    |                                       | 0.0121 [4]                          |          |                  |
| <chem>O=C(ON1N=NC2=CC=CC=C12)C1<br/>=CC2=CC=CC=C2N1</chem>                                                                             |                                      |                                    |                                       | 0.0123 [4]                          |          |                  |
| <chem>FC1=CC=C2NC(=CC2=C1)C(=O)ON<br/>1N=NC2=CC=CC=C12</chem>                                                                          |                                      |                                    |                                       | 0.0138 [4]                          |          |                  |
| <chem>COC1=CC=C(OCC(=O)N[C@H](C(C<br/>)C)C(=O)N[C@H](CC(C)C)C(=O)<br/>N[C@H](C[C@H]2CCNC2=O)C(=O)<br/>c2nc3=CC=CC=c3s2)C=C1</chem>     |                                      | 0.92 [2]                           |                                       | 0.014 [2]                           |          |                  |
| <chem>COC1=CC=CC2=C1C=C(N2)C(=O)N<br/>C(CC(C)C)C(=O)NC(CC1CCNC1=O<br/>)C(=O)COC(=O)C1=CC=CC=C1C#N</chem>                               |                                      | 0.017 [1]                          |                                       |                                     |          |                  |
| <chem>CN(C)C1=CC=C(C=C1)C(=O)ON1N<br/>=NC2=CC=CC=C12</chem>                                                                            |                                      |                                    |                                       | 0.0174 [4]                          |          |                  |

|                                                                                                   |  |           |  |            |          |  |
|---------------------------------------------------------------------------------------------------|--|-----------|--|------------|----------|--|
| NC1=CC=CC=C1C(=O)ON1N=NC2=CC=CC=C12                                                               |  |           |  | 0.0195 [4] |          |  |
| CCCC(NC(=O)C1=CC2=C(N1)C=C=C2OC)C(=O)NC(CC1CCNC1=O)C(=O)CO                                        |  | 0.02 [1]  |  |            |          |  |
| CC(C)(C)CC(NC(=O)C1=CC2=C(N1)C=CC=C2)C(=O)NC(CC1CCNC1=O)C(=O)CO                                   |  | 0.02 [1]  |  |            |          |  |
| CC(C)C[C@H](NC(=O)C1=NC2=CC=CC=C2N1)C(=O)N[C@@H](C[C@@H]1CCNC1=O)C(=O)c1nc2cccc2s1                |  |           |  | 0.022 [3]  |          |  |
| CC(C)C[C@@H](NC(=O)[C@H](NC(=O)COC1=CC=CC=C1)C(C)C(=O)N[C@H](C[C@H]1CCNC1=O)C(=O)c1nc2=CC=CC=c2s1 |  | 2.3 [2]   |  | 0.022 [2]  |          |  |
| O=C(ON1N=NC2=CC=CC=C12)C1=CC2=C(NC=N2)C=C1                                                        |  |           |  | 0.0229 [4] |          |  |
| CC(C)C[C@H](NC(=O)C1=CC2=C(O)C=CC=C2N1)C(=O)N[C@@H](C[C@@H]1CCNC1=O)C(=O)c1nc2cccc2s1             |  |           |  | 0.026 [3]  |          |  |
| CC(C)C[C@H](NC(=O)C1=CC2=CC(Cl)=CC=C2N1)C(=O)N[C@@H](C[C@@H]1CCNC1=O)C(=O)c1nc2cccc2s1            |  |           |  | 0.028 [3]  |          |  |
| CN(C)c1ccc(C(=O)N[C@@H](Cc2cccc2)C(=O)Nc2ccc([N+](=O)[O-])cc2Cl)cc1                               |  | 0.06 [5]  |  | 0.03 [5]   |          |  |
| CC(C)COC1=C2C=C(NC2=CC=C1)C(=O)N[C@@H](CC(C)C(=O)N[C@@H](C[C@@H]1CCNC1=O)C(=O)c1nc2cccc2s1        |  |           |  | 0.03 [3]   |          |  |
| O=C(Oc1cncc(Cl)c1)c1cccc2[nH]ccc12                                                                |  | 0.03 [6]  |  |            |          |  |
| COC1=CC=CC2=C1C=C(N2)C(=O)NC(CCC(C)C)C(=O)NC(CC1CCNC1=O)C(=O)CO                                   |  | 0.034 [1] |  |            |          |  |
| COCC(=O)C(CC1CCNC1=O)NC(=O)C(CC(C)(C)C)NC(=O)C1=CC2=C(N1)C=CC=C2OC                                |  | 0.035 [1] |  |            |          |  |
| CC(C)CC(NC(=O)C1=CC2=C(N1)C=CC=C2)C(=O)NC(CC1CCNC1=O)C(=O)CO                                      |  | 0.038 [1] |  |            |          |  |
| CC(C)C[C@H](NC(=O)[C@H](CNC(=O)C(C)(C)C)NC(=O)OCc1cccc1)C(=O)N[C@H](CCC(C)=O)C[C@@H]1CCNC1=O      |  |           |  | 0.038 [7]  | 2zu4 [7] |  |

|                                                                                                            |            |            |  |            |           |         |
|------------------------------------------------------------------------------------------------------------|------------|------------|--|------------|-----------|---------|
| <chem>Fc1cccc(C[C@H](NC(=O)c2[nH]c3cccc3c2)C(=O)N[C@@H](C[C@@H]4CCNC4=O)C=O)c1</chem>                      | 0.04 [8]   |            |  |            | 6m0k [8]  |         |
| <chem>O=C(Nc1ccc(NC(=O)c2cc(B(O)O)cc([N+](=O)[O-])c2)cc1)c1cc(B(O)O)cc([N+](=O)[O-])c1</chem>              |            |            |  | 0.04 [9]   |           |         |
| <chem>COC1=CC=CC2=C1C=C(N2)C(=O)N(C(C1CCCC1)C(=O)NC(C1CCN1=O)C(=O)CO</chem>                                |            | 0.044 [1]  |  |            |           |         |
| <chem>NC(=O)C1=CC2=C(C=C1)N(CC1=C3=CC=CC=C3C=C1)C(=O)C2=O</chem>                                           | 0.045 [10] |            |  |            |           |         |
| <chem>NC(=O)C1=CC2=C(C=C1)N(CC1=C3=CC=C(Br)C=C3C=C1)C(=O)C2=O</chem>                                       | 0.047 [10] |            |  |            |           |         |
| <chem>CC(C)C[C@H](NC(=O)C1=CC2=CC(OC(C)C)=CC=C2N1)C(=O)N[C@@H](C[C@H]1CCNC1=O)C(=O)c1nc2cccc2s1</chem>     |            |            |  | 0.048 [3]  |           |         |
| <chem>OC(=O)CC1N[Zn]2(NC(CC(O)=O)C(=O)O2)OC1=O</chem>                                                      |            |            |  | 0.05 [11]  | 2z9l [11] | JMF1586 |
| <chem>O=C(Oc1cncc(Br)c1)c1ccc1</chem>                                                                      |            | 0.05 [12]  |  |            |           |         |
| <chem>O=C(Cn1nnc2cccc21)N(Cc1ccsc1)c1ccc(-c2cccc2)cc1</chem>                                               |            | 0.051 [13] |  |            |           |         |
| <chem>CC(OC(C)C)C[C@H](NC(=O)OCc1cccc1)C(=O)N[C@@H](Cn1CCCC1)C(=O)N[C@H](C=O)C[C@H]1CCNC1=O</chem>         |            |            |  | 0.053 [14] | 2gx4 [14] |         |
| <chem>O=C[C@H](C[C@@H]1CCNC1=O)NC(=O)[C@H](CC2CCCC2)NC(=O)c3[nH]c4cccc4c3</chem>                           | 0.053 [8]  |            |  |            | 6lze [8]  |         |
| <chem>COC1=CC=CC2=C1C=C(N2)C(=O)NC(CC(C)C)C(=O)NC(CC1CCNC1=O)C(=O)COC(=O)C1=CC=C(C=C1)C#N</chem>           |            | 0.053 [1]  |  |            |           |         |
| <chem>COCC(=O)C(CC1CCNC1=O)NC(=O)C(CC(C)C)NC(=O)C1=CC2=C(N1)C=CC=C2OC</chem>                               |            | 0.053 [1]  |  |            |           |         |
| <chem>NC(=O)C1=CC2=C(C=C1)N(CC1=CC3=CC=CC=C3S1)C(=O)C2=O</chem>                                            | 0.053 [10] |            |  |            |           |         |
| <chem>CCOC(=O)/C=C/[C@H](C[C@@H]1CCNC1=O)NC(=O)[C@H](CC(C)C)NC(=O)[C@@H](NC(=O)OCc1cccc1)C(C)OC(C)C</chem> |            |            |  | 0.058 [14] |           |         |
| <chem>O=C(Oc1cncc(Cl)c1)c1ccc1</chem>                                                                      |            | 0.06 [12]  |  |            |           |         |
| <chem>O=C(Oc1cncc(Cl)c1)c1ccc(-c2ccc([N+](=O)[O-])cc2)o1</chem>                                            |            | 0.06 [15]  |  |            |           |         |

|                                                                                                                                                                                |            |                |  |            |           |          |
|--------------------------------------------------------------------------------------------------------------------------------------------------------------------------------|------------|----------------|--|------------|-----------|----------|
| CC(C)C[C@@H](NC(=O)[C@H]<br>(NC(=O)OCC1=CC=CC=C1)C(C)C<br>(=O)N[C@H](C[C@H]1CCNC1=O)<br>C(=O)c1ncc(s1)C1=CC=CC=C1                                                              |            |                |  | 0.06 [2]   |           |          |
| O=C(Oc1cncc(Cl)c1)c1ccc(-c2ccc<br>(Cl)cc2)o1                                                                                                                                   |            | 0.063 [12, 15] |  |            |           |          |
| CC(C)[C@H](NC(=O)[C@H](C)NC<br>(=O)[C@H](CO)NC(C)=O)C(=O)<br>N[C@@H](CC1CCCCC1)C(=O)<br>N[C@@H](Cc2c[nH] c[nH+]2)C=O                                                           |            | 0.065 [16]     |  |            | 3avz [16] |          |
| O=C(Oc1cncc(Cl)c1)c1cc2ccccc2[nH]1                                                                                                                                             |            | 0.065 [12]     |  |            |           |          |
| CC(C)C[C@H](NC(=O)C1=CC=CC<br>=CC=C2N1)C(=O)N[C@@H]<br>(C[C@@H]1CCNC1=O)C(=O)<br>c1nc2ccccc2s1                                                                                 |            |                |  | 0.065 [3]  |           |          |
| COC1=CC=C2NC(=CC2=C1)C(=O)N<br>[C@@H](CC(C)C)C(=O)N[C@@H]<br>(C[C@@H]1CCNC1=O)C(=O)<br>c1nc2ccccc2s1                                                                           |            |                |  | 0.067 [3]  |           |          |
| CC(C)C(NC(=O)C(C)NC(=O)OCC1<br>=CC=CC=C1)C(=O)N[C@@H](CC1=<br>CNC2=CC=CC=C12)[C@@H](O)<br>[C@H](O)[C@H](CC1=CNC2=CC=CC<br>=C12)NC(=O)C(NC(=O)C(C)NC<br>(=O)OCC1=CC=CC=C1)C(C)C |            |                |  | 0.073 [17] |           |          |
| COC1=CC=CC2=C1C=C(N2)C(=O)N<br>C(CC(C)C)C(=O)NC(CC1CCNC1=O)<br>C(=O)COC(=O)C1=C(C)C=CC=C1C                                                                                     |            | 0.074 [1]      |  |            |           |          |
| COC1=CC=C(C=C1)C(=O)OCC(=O)<br>C(CC1CCNC1=O)NC(=O)C(CC(C)C)<br>NC(=O)C1=CC2=C(N1)C=CC=C2OC                                                                                     |            | 0.079 [1]      |  |            |           |          |
| O=C(Oc1cncc(Cl)c1)c1cccc2cc[nH]c12                                                                                                                                             |            | 0.08 [6]       |  |            |           |          |
| COC1=CC=CC2=C1C=C(N2)C(=O)N<br>C(CC(C)C)C(=O)NC(CC1CCNC1=O)<br>C(=O)COC(=O)C1=CC=C(F)C=C1                                                                                      |            | 0.082 [1]      |  |            |           |          |
| COC1=CC=CC2=C1C=C(N2)C(=O)N<br>(C)C(CC(C)C)C(=O)NC(CC1CCNC1<br>=O)C(=O)CO                                                                                                      |            | 0.083 [1]      |  |            |           |          |
| COC1=CC=CC2=C1C=C(N2)C(=O)N<br>C(CC(C)C)C(=O)NC(CC1CCNC1=O)<br>C(=O)COC(=O)C1=CC=CC=C1                                                                                         |            | 0.086 [1]      |  |            |           |          |
| COC1=CC=CC2=C1C=C(N2)C(=O)N<br>C(CC(C)C)C(=O)NC(CC1CCNC1=O)<br>C(=O)COC(=O)C1=CC=C(C) C=C1                                                                                     |            | 0.087 [1]      |  |            |           |          |
| C1C1=CN=CC(OC(=O)C2=CC=CS2)<br>=C1                                                                                                                                             | 0.088 [18] | 0.5 [19]       |  |            |           | MAC-5576 |

|                                                                                                                  |                                     |                       |           |           |           |       |
|------------------------------------------------------------------------------------------------------------------|-------------------------------------|-----------------------|-----------|-----------|-----------|-------|
| <chem>C1C1=CC(OC(=O)C2=CC=C3N(C=C3=C2)S(=O)(=O)C2=CC=CC(=C2)N(=O)=O)=CN=C1</chem>                                |                                     | 0.089 [6]             |           |           |           |       |
| <chem>CC(C)(C)CC(NC(=O)C1CCCO1)C(=O)NC(CC1CCNC1=O)C(=O)CO</chem>                                                 |                                     | 0.091 [1]             |           |           |           |       |
| <chem>O=C(Oc1cncc(Cl)c1)c1cc2ccccc2s1</chem>                                                                     |                                     | 0.095 [12]            |           |           |           |       |
| <chem>COC1=CC=CC2=C1C=C(N2)C(=O)NC(CC(C)C)C(=O)NC(CC1CCNC1=O)C(=O)COC(=O)C1=CC=C(Cl)C=C1</chem>                  |                                     | 0.097 [1]             |           |           |           |       |
| <chem>CC(C)[C@H](NC(=O)[C@@H](NC(C)=O)[C@@H](C)O)C(=O)N[C@@H](CC1CCCC1)C(=O)N[C@@H](Cc2c[nH]c[nH+]2)C=O</chem>   |                                     | 0.098 [16]            |           |           | 3atw [16] |       |
| <chem>CC(C)C[C@H](NC(=O)[C@@H](NC(=O)OCc1ccccc1)[C@@H](C)OC(C)(C)C(=O)N[C@H](CCC(=O)C2CC2)C[C@@H]3CCNC3=O</chem> |                                     |                       |           | 0.099 [7] | 2zu5 [7]  |       |
| <chem>COC1=CC=CC2=C1C=C(N2)C(=O)NC(CC1=CC=CC=C1)C(=O)NC(CC1CCNC1=O)C(=O)CO</chem>                                |                                     | 0.103 [1]             |           |           |           |       |
| <chem>COCC(=O)C(CC1CCNC1=O)NC(=O)C(CC(C)C)C)NC(=O)C1=C2=C(N1)C=CC=C2</chem>                                      |                                     | 0.105 [1]             |           |           |           |       |
| <chem>O=C(Oc1cncc(Cl)c1)c1cc2ccccc2oc1=O</chem>                                                                  |                                     | 0.108 [15]            |           |           |           |       |
| <chem>CC(=O)O[Hg]C1=CC=CC=C1</chem>                                                                              | 0.4 [20]                            |                       | 0.11 [20] |           |           |       |
| <chem>CCOCC(=O)C(CC1CCNC1=O)NC(=O)C(CC(C)C)C)NC(=O)C1=CC2=C(N1)C=CC=C2</chem>                                    |                                     | 0.112 [1]             |           |           |           |       |
| <chem>CC(C)C[C@H](NC(=O)C1CC2=CC=CC=C2N1)C(=O)N[C@@H](C[C@@H]1CCNC1=O)C(=O)c1nc2ccccc2s1</chem>                  |                                     |                       |           | 0.12 [3]  |           |       |
| <chem>NC(=O)c1ccc2c(c1)C(=O)C(=O)N2Cc1ccc2ccccc2c1</chem>                                                        |                                     | 0.37 [21]             |           | 0.12 [21] |           |       |
| <chem>O=C(Oc1cncc(Cl)c1)c1ccc(-c2ccc(Cl)cc2[N+](=O)[O-])o1</chem>                                                |                                     | 0.122 [15]            |           |           |           |       |
| <chem>O=C(Oc1cncc(Cl)c1)c1cccc2ccccc12</chem>                                                                    |                                     | 0.124 [15]            |           |           |           |       |
| <chem>COCC(=O)[C@H](C[C@@H]1CCNC1=O)NC(=O)C(CCC(C)C)N(C)C(=O)C1=CC2=C(N1)C=CC=C2</chem>                          |                                     | 0.131 [1]             |           |           |           |       |
| <chem>CC(=O)N1CC2=C(CC1C(=O)OC1=CN=CC(Cl)=C1)C=CC=C2</chem>                                                      |                                     | 0.14 [6]              |           |           |           |       |
| <chem>CC(C)C[C@H](NC(=O)OCc1ccccc1)C(=O)N[C@@H](C[C@@H]2CCNC2=O)[C@@H](O)[S](O)(=O)=O</chem>                     | 0.62 [22]<br>0.19 [23]<br>0.03 [24] | 2.2 [22]<br>0.05 [23] |           |           | 6wtj [23] | GC376 |

|                                                                                                                                                                                           |           |            |           |           |  |            |
|-------------------------------------------------------------------------------------------------------------------------------------------------------------------------------------------|-----------|------------|-----------|-----------|--|------------|
| <chem>CC(C)C[C@H](NC(=O)C1=CC2=CC(O)=CC=C2N1)C(=O)N[C@@H](C[C@@H]1CCNC1=O)C(=O)c1nc2ccccc2s1</chem>                                                                                       |           |            |           | 0.16 [3]  |  |            |
| <chem>O=C(Oc1cncc(Cl)c1)c1ccncc1</chem>                                                                                                                                                   |           | 0.164 [15] |           |           |  |            |
| <chem>O=C(Oc1cncc(Cl)c1)c1cc2ccccc2o1</chem>                                                                                                                                              |           | 0.17 [12]  |           |           |  |            |
| <chem>CCCCC1CCC(CC1)OC(=O)N[C@@H](CC(C)C)C(=O)N[C@@H](C[C@@H]1CCNC1=O)C=O</chem>                                                                                                          | 0.17 [22] | 0.9 [22]   |           |           |  |            |
| <chem>O=N1=CC=CC=C1S[Zn]SC1=CC=CC=N1=O</chem>                                                                                                                                             |           |            |           | 0.17 [25] |  |            |
| <chem>CC(C)C[C@@H](NC(=O)[C@H](NC(=O)COC1=CC=CC(=C1)N(C)C)C(C)C)C(=O)N[C@H](C[C@H]1CCNC1=O)C(=O)c1ncc(s1)C1=CC=CC=C1</chem>                                                               |           |            |           | 0.17 [2]  |  |            |
| <chem>O=C(N[C@@H](CC1CCCCC1)C(=O)N[C@@H](C[C@@H]1CCNC1=O)C(=O)C(=O)NCc1cccc1)\C=C\C1=CC=CC=C1</chem>                                                                                      | 0.18 [26] | 0.71 [26]  |           |           |  |            |
| <chem>COC1=CC=CC2=C1C=C(N2)C(=O)NC(CC(C)C)C(=O)NC(CC1CCNC1=O)C(=O)COC(=O)C1CC1</chem>                                                                                                     |           | 0.182 [1]  |           |           |  |            |
| <chem>CC(C)CC(NC(=O)C(NC(=O)c1ccncc1)C(C)C)C(=O)NC(C=O)CC1CCNC1=O</chem>                                                                                                                  |           | 0.186 [27] |           |           |  |            |
| <chem>O=C[C@H](C[C@@H]1CCNC1=O)NC(=O)[C@H](Cc1cccc1)NC(=O)\C=C\c1ccc(Cl)cc1F</chem>                                                                                                       |           | 0.2 [28]   |           |           |  |            |
| <chem>CCCCC1CCC(CC1)OC(=O)N[C@@H](CC(C)C)C(=O)N[C@@H](C[C@@H]1CCNC1=O)[C@@H](O)S(O)(=O)=O</chem>                                                                                          | 0.2 [22]  | 1.0 [22]   |           |           |  |            |
| <chem>COC1=CC=CC2=C1C=C(N2)C(=O)NC(CC(C)C)C(=O)NC(CC1CCNC1=O)C(=O)COC(=O)C1=C(OC)C=C=C1OC</chem>                                                                                          |           | 0.205 [1]  |           |           |  |            |
| <chem>O=C(Oc1cncc(Cl)c1)c1ccc(-c2ccccc2[N+](=O)[O-])o1</chem>                                                                                                                             |           | 0.208 [15] |           |           |  |            |
| <chem>CC1=C(C=CC(=C1)C2=CC(=C(C=C2)N=NC3=C(C4=C(C=C3)C(=CC(=C4N)S(=O)(=O)[O-])S(=O)(=O)[O-])O)C)N=NC5=C(C6=C(C=C5)C(=CC(=C6N)S(=O)(=O)[O-])S(=O)(=O)[O-])O.[Na+].[Na+].[Na+].[Na+]</chem> | 0.2 [20]  |            | 0.21 [20] |           |  | Evans blue |
| <chem>COC1=CC=CC2=C1C=C(N2)C(=O)NC(CC(C)C)C(=O)NC(CC1CCNC1=O)C(=O)COC(C)=O</chem>                                                                                                         |           | 0.22 [1]   |           |           |  |            |
| <chem>O=C(Oc1cncc(Cl)c1)c1ccc2cc[nH]c2c1</chem>                                                                                                                                           |           | 0.23 [6]   |           |           |  |            |

|                                                                                                                         |           |            |  |           |           |            |
|-------------------------------------------------------------------------------------------------------------------------|-----------|------------|--|-----------|-----------|------------|
| <chem>COC1=CC=CC2=C1C=C(N2)C(=O)NC(CC(C)C)C(=O)NC(CC1CCNC1=O)C(=O)COC(=O)C(C)C</chem>                                   |           | 0.23 [1]   |  |           |           |            |
| <chem>CCCC1CCC(CC1)OC(=O)N[C@@H](CC(C)C)C(=O)N[C@@H](C[C@@H]1CCNC1=O)[C@@H](O)S(O)(=O)=O</chem>                         | 0.23 [22] | 1.7 [22]   |  |           |           |            |
| <chem>O=C(N[C@@H](CC1CC1)C(=O)N[C@@H](C[C@@H]1CCNC1=O)C(=O)C(=O)NCc1cccc1)\C=C\c1cccc1</chem>                           |           | 0.24 [29]  |  |           | 5n5o [29] |            |
| <chem>CN1C2=NC(=O)N(C(=O)C2=NC(=N1)C3=CC=C(C=C3)C(F)(F)F)C</chem>                                                       | 0.26 [30] |            |  |           |           | walrycin B |
| <chem>CC(=O)N[C@@H](C)C(=O)N[C@H](C(=O)N[C@@H](CC1CCCCC1)C(=O)N[C@H](C=O)Cc1c[nH]cn1)C(C)C</chem>                       |           | 0.27 [16]  |  |           |           |            |
| <chem>O=C(Oc1cncc(Cl)c1)c1cscn1</chem>                                                                                  |           | 0.27 [12]  |  |           |           |            |
| <chem>COC1=CC=C(OCC(=O)N[C@H](C(C)C)C(=O)N[C@H](CC(C)C)C(=O)N[C@H](C[C@H]2CCNC2=O)C(=O)c2ncc(s2)C2=CC=CC=C2)C=C1</chem> |           |            |  | 0.27 [2]  |           |            |
| <chem>CCCC1CCC(CC1)OC(=O)N[C@@H](CC(C)C)C(=O)N[C@@H](C[C@@H]1CCNC1=O)C=O</chem>                                         | 0.28 [22] | 1.7 [22]   |  |           |           |            |
| <chem>O=N(=O)O[Hg]C1=CC=CC=C1</chem>                                                                                    |           |            |  | 0.3 [25]  |           |            |
| <chem>Cc1cc(c(Cl)cc1Cl)S(=O)(=O)c1c(cc(cc1[N+](=[O-])=O)C(F)(F)F)[N+](=[O-])=O</chem>                                   |           | 0.3 [31]   |  |           | 2gz7 [31] |            |
| <chem>ClCC(=O)[C@H](CC1=CC=CC=C1)NC(=O)OCC1=CC=CC=C1</chem>                                                             |           |            |  | 0.31 [32] |           |            |
| <chem>COc1cccc1NCC(=O)N[C@@H](CC(C)C)C(=O)N[C@@H](C[C@@H]1CCNC1=O)C(=O)c1nc2cccc2s1</chem>                              |           |            |  | 0.33 [33] |           |            |
| <chem>COC1=CC=C2C=C(NC2=C1)C(=O)N[C@@H](CC(C)C)C(=O)N[C@@H](C[C@@H]1CCNC1=O)C(=O)c1nc2cccc2s1</chem>                    |           |            |  | 0.33 [3]  |           |            |
| <chem>CC(C)C[C@H](NC(=O)\C=C1cccc1)C(=O)N[C@@H](C[C@@H]1CCNC1=O)C(=O)C(=O)NCc1cccc1</chem>                              |           | 0.33 [29]  |  |           |           |            |
| <chem>CC(C)C[C@@H](NC(=O)[C@H](NC(=O)COC1=CC=CC(=C1)N(C)C)C(C)C)C(=O)N[C@H](C[C@H]1CCNC1=O)C(=O)c1ncc(C)s1</chem>       |           |            |  | 0.33 [2]  |           |            |
| <chem>O=C(Oc1cncc(Cl)c1)c1cccc1[N+](=O)[O-]</chem>                                                                      |           | 0.333 [15] |  |           |           |            |
| <chem>CC(=O)N[C@@H](CO)C(=O)N[C@H](C(=O)N[C@@H](CC1CCCCC1)C(=O)N[C@H](C=O)Cc1c[nH]cn1)C(C)C</chem>                      |           | 0.34 [16]  |  |           |           |            |



|                                                                                                                       |           |            |  |           |           |                       |
|-----------------------------------------------------------------------------------------------------------------------|-----------|------------|--|-----------|-----------|-----------------------|
| <chem>COc1cccc(C(=O)Oc2cncc(Cl)c2)c1</chem>                                                                           |           | 0.34 [12]  |  |           |           |                       |
| <chem>O[C@H]([C@H](CC1=CNC2=CC=CC=C12)NC(=O)OCC1=CC=CC=C1)[C@H](O)[C@H](CC1=CNC2=CC=CC=C12)NC(=O)OCC1=CC=CC=C1</chem> |           |            |  | 0.34 [17] |           |                       |
| <chem>Cc1ccc(S(=O)(=O)N2C=CC3C=C(C(=O)Oc4cncc(Cl)c4)C=CC32)cc1</chem>                                                 |           | 0.37 [6]   |  |           |           |                       |
| <chem>ClCC(=O)[C@H](CC1=CC2=CC=CC=C2C=C1)NC(=O)OCC1=CC=CC=C1</chem>                                                   |           |            |  | 0.37 [32] |           |                       |
| <chem>FC1=CC=C(C[C@H](NC(=O)OCC2=CC=CC=C2)C(=O)CC1)C=C1</chem>                                                        |           |            |  | 0.38 [32] |           |                       |
| <chem>CC(=O)N[C@@H](CO)C(=O)N[C@@H](C)C(=O)N[C@H](C(=O)N[C@@H](Cc1ccccc1)C(=O)N[C@H](C=O)C1c[nH]cn1)C(C)C</chem>      |           | 0.39 [16]  |  |           |           |                       |
| <chem>COc1cccc(NCC(=O)N[C@@H](CC(C)C)C(=O)N[C@@H](C[C@@H]2CCNC2=O)C(=O)c2nc3ccccc3s2)c1</chem>                        |           |            |  | 0.39 [33] |           |                       |
| <chem>CC(C)C[C@H](NC(=O)OCC1=CC=C(C=C1)C(=O)N[C@@H](CC1CCNC1=O)C=O</chem>                                             | 0.4 [23]  | 0.07 [23]  |  |           | 6wtk [23] | GC373                 |
| <chem>CC(=O)n1ccc2cc(C(=O)Oc3cncc(Cl)c3)ccc21</chem>                                                                  |           | 0.4 [6]    |  |           |           |                       |
| <chem>CC(C)(C)OC(=O)C[C@H](NC(=O)OCC1=CC=CC=C1)C(=O)CBr</chem>                                                        |           |            |  | 0.4 [32]  | 3d62 [32] |                       |
| <chem>CC(C)C[C@H](NC(=O)OC1CCC(F)(F)CC1)C(=O)N[C@@H](C[C@@H]1CCNC1=O)[C@@H](O)S(O)(=O)=O</chem>                       | 0.41 [22] | 2.2 [22]   |  |           |           |                       |
| <chem>COc1ccc(CC(=O)N[C@@H](CC(C)C)C(=O)N[C@@H](C[C@@H]2CCNC2=O)C(=O)c2nc3ccccc3s2)cc1</chem>                         |           |            |  | 0.42 [33] |           |                       |
| <chem>CC(C)C[C@H](NC(=O)OC1CCC(F)(F)CC1)C(=O)N[C@@H](C[C@@H]1CCNC1=O)C=O</chem>                                       | 0.43 [22] | 2.3 [22]   |  |           |           |                       |
| <chem>O=C(Oc1cncc(Cl)c1)c1ccc(Cl)cc1</chem>                                                                           |           | 0.434 [15] |  |           |           |                       |
| <chem>CC(C)C[C@H](NC(=O)OCC1CCC(F)(F)CC1)C(=O)N[C@@H](C[C@@H]2CCNC2=O)[C@@H](O)[S](O)(=O)=O</chem>                    | 0.45 [22] | 1.1 [22]   |  |           | 6xmk [22] |                       |
| <chem>CCCC(C(=O)C(=O)NCC1=CC=CC=N1)NC(=O)C(CC(C)C)NC(=O)OCC2=CC=CC=C2</chem>                                          | 0.45 [24] |            |  |           |           | Calpain inhibitor XII |
| <chem>CC(C)C[C@H](NC(=O)OCc1ccccc1)C(=O)N[C@@H](C[C@@H]1CCNC1=O)C(=O)c1nc2ccccc2s1</chem>                             |           |            |  | 0.42 [33] |           |                       |

|                                                                                                                                                              |           |            |          |           |           |            |
|--------------------------------------------------------------------------------------------------------------------------------------------------------------|-----------|------------|----------|-----------|-----------|------------|
| <chem>COC1=CC=C(OCC(=O)N[C@H](C(C)C)C(=O)N[C@H](CC(C)C)C(=O)N[C@H](C[C@H]2CCNC2=O)C(=O)c2ncc(s2)C2=CC=CC=C2OC)C=C1</chem>                                    |           |            |          | 0.47 [2]  |           |            |
| <chem>CC(C)C[C@H](NC(=O)OCC1CCC(F)(F)CC1)C(=O)N[C@@H](C[C@@H]1CCNC1=O)C=O</chem>                                                                             | 0.48 [22] | 1.2 [22]   |          |           |           |            |
| <chem>[H]C(=O)[C@H](C[C@@H]1CCNC1=O)NC(=O)[C@H](CC1=CC=CC=C1)NC(=O)\C=C\C1=CC=C(C=C1)N(C)C</chem>                                                            |           | 0.5 [28]   |          |           |           |            |
| <chem>O=C(Oc1cncc(Br)c1)c1cccs1</chem>                                                                                                                       |           | 0.5 [34]   |          |           |           |            |
| <chem>O=C(Oc1cncc(Cl)c1)c1ccc(-c2cccc([N+](=O)[O-])c2)o1</chem>                                                                                              |           | 0.5 [15]   |          |           |           |            |
| <chem>CC(C)C[C@H](NC(=O)/C=C/c1cccc1)C(=O)N[C@H](C=O)C[C@@H]1CCNC1=O</chem>                                                                                  |           | 0.508 [27] |          |           | 6lny [27] |            |
| <chem>CCP(CC)(CC)=[Au]S[C@@H]1O[C@H](COC(C)=O)[C@@H](OC(C)=O)[C@H](OC(C)=O)[C@H]1OC(C)=O</chem>                                                              | 0.51 [35] |            |          |           |           | Auranofin  |
| <chem>COC(=O)CC(NC(=O)[C@@H](NC(=O)OCC1=CC=CC=C1)C(C)C)C(=O)CF</chem>                                                                                        |           |            |          | 0.51 [32] |           |            |
| <chem>Clc1ccc(SSc2ncco2)cc1</chem>                                                                                                                           |           | 0.516 [36] |          |           |           |            |
| <chem>CCOC(=O)/C=C/C(Cc1cccc1)NC(=O)C(Cc1cccc1)NC(=O)\C=C\c1ccc(N(C)C)cc1</chem>                                                                             |           | 0.52 [37]  |          |           |           |            |
| <chem>CC(C)C[C@H](NC(=O)COc1cccc1)C(=O)N[C@@H](C[C@@H]1CCNC1=O)C(=O)c1nc2ccccc2s1</chem>                                                                     |           |            |          | 0.56 [33] |           |            |
| <chem>[Na+].[O-]C(=O)c1cccc1S[Hg]CC</chem>                                                                                                                   | 0.6 [20]  |            | 0.6 [20] |           |           | Thimerosal |
| <chem>CC(C)C(NC(=O)[C@@H](C)NC(=O)OCC1=CC=CC=C1)C(=O)N[C@H](CC1=CC=CC=C1)C(O)C(O)[C@@H](CC1=CC=CC=C1)NC(=O)C(NC(=O)[C@@H](C)NC(=O)OCC1=CC=CC=C1)C(C)C</chem> |           |            |          | 0.6 [38]  |           |            |
| <chem>CC(=O)N[C@H](C(=O)N[C@H](C(=O)N[C@@H](CC(C)C)C(=O)N[C@@H](CCC(=O)N(C)C)C(=O)Cn1[nH]c(=O)c2c([N+](=O)[O-])cccc2c1=O)[C@H](C)OCc1cccc1)C(C)C</chem>      |           | 0.6 [39]   |          |           |           |            |
| <chem>COc1ccc(CCC(=O)N[C@@H](CC(C)C)C(=O)N[C@@H](C[C@@H]2CCNC2=O)C(=O)c2nc3cccc3s2)cc1</chem>                                                                |           |            |          | 0.61 [33] |           |            |

|                                                                                                                         |           |            |          |           |           |                        |
|-------------------------------------------------------------------------------------------------------------------------|-----------|------------|----------|-----------|-----------|------------------------|
| <chem>CC(C)C[C@@H](NC(=O)[C@H](NC(=O)COC1=CC=C(C=C1)N(C)C)C(C)C)C(=O)N[C@H](C[C@H]1CCNC1=O)C(=O)c1nc2=CC=CC=c2s1</chem> |           | 0.65 [2]   |          |           |           |                        |
| <chem>CCOC(=O)\C=C\[C@H](C[C@@H]1CCNC1=O)NC(=O)[C@H](CC(C)C)NC(=O)[C@@H](NC(=O)OCc1ccc1)C(C)C</chem>                    |           |            |          | 0.66 [14] |           |                        |
| <chem>CC(C)C[C@H](NC(=O)OCc1cccc1)C(=O)N[C@@H](C[C@@H]1CCNC1=O)C(=O)c1ncc(-c2ccccc2)s1</chem>                           |           |            |          | 0.66 [33] |           |                        |
| <chem>COC(=O)/C=C/[C@H](C[C@@H]1CCNC1=O)NC(=O)[C@H](CC(C)C)NC(=O)[C@@H](NC(=O)OCc1ccc1)C(C)C</chem>                     |           |            |          | 0.66 [33] |           |                        |
| <chem>CC(C)C[C@H](NC(=O)OC1CCCC1)C(=O)N[C@@H](C[C@@H]1CCNC1=O)[C@@H](O)S(O)(=O)=O</chem>                                | 0.65 [22] |            | 3.8 [22] |           |           |                        |
| <chem>CC(C)(C)OC(=O)NC1=CC=CN([C@@H](CC2CC2)C(=O)N[C@@H](C[C@@H]3CCNC3=O)[C@@H](O)C(=O)NCc4ccccc4)C1=O</chem>           | 0.67 [26] |            | 0.9 [26] |           | 6y2g [26] |                        |
| <chem>O=C1N([Se]C2=CC=CC=C12)C1=CC=CC=C1</chem>                                                                         | 0.67 [40] |            |          |           |           | Ebselen                |
| <chem>CC(C)C[C@H](NC(=O)C1=CNC2=C1C=CC=C2)C(=O)N[C@@H](C[C@@H]1CCNC1=O)C(=O)c1nc2cccc2s1</chem>                         |           |            |          | 0.68 [3]  |           |                        |
| <chem>O=C(Oc1cncc(Cl)c1)c1cccc([N+](=O)[O-])c1</chem>                                                                   |           | 0.684 [15] |          |           |           |                        |
| <chem>Clc1ccc(SSc2ncccn2)cc1</chem>                                                                                     |           | 0.684 [36] |          |           |           |                        |
| <chem>CC(C)C[C@H](NC(=O)/C=C/c1cccc1)C(=O)N[C@@H](C[C@@H]1CCNC1=O)C(=O)c1nc2cccc2s1</chem>                              |           |            |          | 0.69 [33] |           |                        |
| <chem>O=C(Oc1cncc(Cl)c1)c1ccn1</chem>                                                                                   |           | 0.697 [15] |          |           |           |                        |
| <chem>BrC1ccc(SSc2ncccn2)cc1</chem>                                                                                     |           | 0.697 [36] |          |           |           |                        |
| <chem>CC(=O)O[Hg]C1=CC=CC=C1</chem>                                                                                     |           |            |          | 0.7 [25]  |           | Phenylmercuric acetate |
| <chem>[H]C(=O)[C@H](C[C@@H]1CCNC1=O)NC(=O)[C@H](CC1=CC=CC=C1)NC(=O)\C=C\C1=CC=CC(Br)=C1</chem>                          |           | 0.7 [28]   |          |           |           |                        |
| <chem>OC(=O)c1cc(C(O)=O)c(cc1C(O)=O)C(O)=O</chem>                                                                       |           |            |          | 0.7 [11]  | 2z9g [11] | PMA                    |
| <chem>COc1ccc/C=C/C(=O)N[C@@H](CC(C)C)C(=O)N[C@@H](C[C@@H]2CCNC2=O)C(=O)c2nc3ccccc3s2)cc1</chem>                        |           |            |          | 0.7 [33]  |           |                        |

|                                                                                                                    |           |            |           |           |           |           |
|--------------------------------------------------------------------------------------------------------------------|-----------|------------|-----------|-----------|-----------|-----------|
| COc1ncccc1-c1ccc(N(Cc2ccsc2)<br>C(=O)Cn2nnc3ccccc32)cc1                                                            |           | 0.7 [13]   |           |           |           |           |
| COC1=CC(OCC(=O)N[C@H](C(C)C)<br>C(=O)N[C@H](CC(C)C)C(=O)N[C@<br>H](C[C@H]2CCNC2=O)C(=O)c2nc3<br>=CC=CC=c3s2)=CC=C1 |           | 0.75 [2]   |           |           |           |           |
| CC(C)C[C@H](NC(=O)C1=NC2=CC=<br>CC=C2S1)C(=O)N[C@@H](C[C@@H]<br>1CCNC1=O)C(=O)c1nc2ccccc2s1                        |           |            |           | 0.8 [3]   |           |           |
| CC1=CC[C@]2(C)CC[C@]3(C)C4=C<br>C=C5C(=CC(=O)C(O)=C5C)[C@]4(<br>C)CC[C@@]3(C)[C@@H]2C1                             |           |            |           | 0.8 [41]  |           |           |
| CC(C)C[C@H](NC(=O)OC1CCCCC1)<br>C(=O)N[C@@H](C[C@@H]1CCNC1=<br>O)C=O                                               | 0.82 [22] |            | 3.9 [22]  |           |           |           |
| CC(C)CC(NC(=O)/C=C/c1ccccc1)<br>C(=O)NC(C=O)CC1CCNC1=O                                                             |           |            | 0.83 [27] |           | 6lo0 [27] |           |
| CC(C)CC(NC(=O)COC1=CC=C(C=C1)<br>N(C)C)C(=O)NC(CC1CCNC1=O)<br>C(=O)c1nc2=CC=CC=c2s1                                |           |            |           | 0.84 [33] |           |           |
| CC(C)C[C@H](NC(=O)COc1cccc(N(<br>C)C)c1)C(=O)N[C@@H](C[C@@H]1C<br>CNC1=O)C(=O)c1nc2ccccc2s1                        |           |            |           | 0.84 [33] |           |           |
| O=[N+][O-]c1ccccc1SSc1ncccn1                                                                                       |           | 0.883 [36] |           |           |           |           |
| O=C(Oc1ccc(S(=O)(=O)c2ccc(OC<br>(=O)C(Cl)=C(Cl)Cl)cc2)cc1)C(Cl<br>)=C(Cl)Cl                                        |           | 0.9 [31]   |           |           |           |           |
| Cc1cc(C)nc(SSc2ccccc2[N+](=O)[O-]<br>)n1                                                                           |           | 0.921 [36] |           |           |           |           |
| O=C\1c3c(O)c(O)c(O)cc3O\C(=C\1)<br>c2ccccc2                                                                        | 0.94 [42] |            |           |           | 6m2n [42] | Baicalein |
| O=C1C(=O)N(Cc2cc3ccccc3s2)c2ccc(I)<br>cc21                                                                         |           | 0.95 [43]  |           |           |           |           |
| CC(C)CC(C(=O)NC(CC(C)C)C(=O)N<br>C(CCSC)C=O)NC(=O)C                                                                | 0.97 [24] |            |           |           |           |           |
| O=C(Cn1nnc2ccccc21)N(Cc1ccsc1)<br>c1ccc(-c2ccnc2)cc1                                                               |           | 0.97 [13]  |           |           |           |           |
| O=C1C(=O)N(Cc2cc3ccccc3s2)c2c<br>(Br)ccccc21                                                                       |           | 0.98 [43]  |           |           |           |           |
| CCNCCC1=CC=C(C=C1)C(=O)CN1<br>N=NC2=CC=CC=C12                                                                      |           |            |           | 1.0 [4]   |           |           |
| CCN(C(=S)S[Zn]SC(=S)N(CC)C1<br>=CC=CC=C1)C1=CC=CC=C1                                                               |           |            |           | 1.0 [25]  |           |           |
| CC(C)CC(NC(C)=O)C(=O)NC(CC1<br>CCNC1=O)C(=O)COC(=O)C1=C(Cl)<br>C=CC=C1Cl                                           |           | 1.028 [1]  |           |           |           |           |

|                                                                                                                                                                                |          |            |          |           |           |                  |
|--------------------------------------------------------------------------------------------------------------------------------------------------------------------------------|----------|------------|----------|-----------|-----------|------------------|
| CC1CCN(S(=O)(=O)c2ccc3c(c2)C(=O)C(=O)N3C)CC1                                                                                                                                   |          | 1.04 [44]  |          |           |           |                  |
| CC1CCN(S(=O)(=O)c2ccc3c(c2)C(=O)C(=O)N3Cc2ccccc2)CC1                                                                                                                           |          | 1.69 [44]  |          |           |           |                  |
| COCC(=O)C(CC1CCNC1=O)NC(=O)C(CC(C)(C)C)NC(=O)C1CCCO1                                                                                                                           |          | 1.076 [1]  |          |           |           |                  |
| CC(=O)N1C=CC2=C(C=CC=C12)C(=O)OC1=CN=CC(Cl)=C1                                                                                                                                 |          | 1.08 [6]   |          |           |           |                  |
| O=C1C(=O)N(Cc2ccc3ccccc3c2)c2ccc(I)cc21                                                                                                                                        |          | 1.1 [21]   |          |           |           |                  |
| COC(=O)c1ccccc1SSc1nnco1                                                                                                                                                       |          | 1.118 [36] |          |           |           |                  |
| Cc1cc(C)nc(SSc2ccc(Br)cc2)n1                                                                                                                                                   |          | 1.121 [36] |          |           |           |                  |
| CC1CCN(S(=O)(=O)c2ccc3c(c2)C(=O)C(=O)N3)CC1                                                                                                                                    |          | 1.18 [44]  |          |           |           |                  |
| O=C(N[C@@H](Cc1ccccc1)C(=O)N[C@@H](C[C@@H]1CCNC1=O)C(=O)c1nc2ccccc2s1)OCc1ccccc1                                                                                               |          |            |          | 1.2 [33]  |           |                  |
| Cc1ccc(SSc2nccs2)cc1                                                                                                                                                           |          | 1.25 [36]  |          |           |           |                  |
| COC(=O)c1ccccc1SSc1nc(C)co1                                                                                                                                                    |          | 1.264 [36] |          |           |           |                  |
| O=C(N[C@@H](CC1CCCC1)C(=O)N[C@@H](C[C@@H]1CCNC1=O)C(=O)C(=O)NCc1ccccc1)\C=C\c1ccccc1                                                                                           |          | 1.27 [29]  |          |           |           |                  |
| COC1=C(C=CC(=C1)C2=CC(=C(C=C2)N=NC3=C(C4=C(C=C3)C(=CC(=C4N)S(=O)(=O)[O-])S(=O)(=O)[O-])O)OC)N=NC5=C(C6=C(C=C5)C(=CC(=C6N)S(=O)(=O)[O-])S(=O)(=O)[O-])O.[Na+].[Na+].[Na+].[Na+] | 7.7 [20] |            | 1.3 [20] |           |           | Chicago Sky Blue |
| COC1=CC=C(OCC(=O)N[C@@H](C(C)C)C(=O)N[C@@H](CC(C)C)C(=O)N[C@@H](C[C@@H]2CCNC2=O)C(=O)c2ncc(s2)C2=CC=C(Cl)C=C2)C=C1                                                             |          |            |          | 1.3 [2]   |           |                  |
| COc1ccc(/C=C/C(=O)N[C@@H](CC(C)C)C(=O)N[C@@H](C[C@@H]2CCNC2=O)C(=O)c2nc3ccccc3s2)cc1OC                                                                                         |          |            |          | 1.3 [33]  |           |                  |
| CN(C)c1ccc(cc1)C(O)=O                                                                                                                                                          |          |            |          | 1.38 [45] | 2v6n [45] |                  |
| CC1=CC2=C(S[Zn]S2)C=C1                                                                                                                                                         |          |            |          | 1.4 [25]  |           |                  |



|                                                                                                                                                          |           |            |  |            |           |
|----------------------------------------------------------------------------------------------------------------------------------------------------------|-----------|------------|--|------------|-----------|
| <chem>COC(=O)c1ccccc1SSc1nnc(C)o1</chem>                                                                                                                 |           | 1.679 [36] |  |            |           |
| <chem>CC(C)C[C@@H](NC(=O)[C@H](NC(=O)COC1=CC=C(C=C1)C(O)=O)C(C)C(=O)N[C@H](C[C@H]1CCNC1=O)C(=O)c1nc2=CC=CC=c2s1</chem>                                   |           | 1.7 [2]    |  |            |           |
| <chem>CC(C)C[C@H](NC(=O)C1=CC=CN1)C(=O)N[C@@H](C[C@@H]1CCNC1=O)C(=O)c1nc2ccccc2s1</chem>                                                                 |           |            |  | 1.7 [3]    |           |
| <chem>CC(C)[C@H](NC(=O)OCc1ccccc1)C(=O)N[C@@H](C[C@@H]1CCNC1=O)C(=O)c1nc2ccccc2s1</chem>                                                                 |           |            |  | 1.71 [33]  |           |
| <chem>Cc1nnc(SSc2ccccc2[N+](=O)[O-])o1</chem>                                                                                                            |           | 1.713 [36] |  |            |           |
| <chem>CC(=O)n1nc(SSc2ccccc2[N+](=O)[O-])nc1-c1ccnc1</chem>                                                                                               |           | 1.762 [36] |  |            |           |
| <chem>CCCCCNC(=O)N1C=C(F)C(=O)NC1=O</chem>                                                                                                               | 1.82 [47] |            |  |            |           |
| <chem>Clc1ccc(SSc2nccs2)cc1</chem>                                                                                                                       |           | 1.871 [36] |  |            |           |
| <chem>CC(C)C[C@H](NC(=O)[C@@H](NC(=O)[C@H](C)NC(=O)c1cc(C)on1)C(C)C(=O)N[C@@H](C[C@@H]2CCNC2=O)\C=C/C(=O)OCc3ccccc3</chem>                               |           |            |  | 1.9 [48]   | 2hob [48] |
| <chem>COC1=CC=CC=C1OCC(=O)N[C@H](C(C)C)C(=O)N[C@H](CC(C)C)C(=O)N[C@H](C[C@H]1CCNC1=O)C(=O)c1nc2=CC=CC=c2s1</chem>                                        |           | 1.7 [2]    |  | 0.0041 [2] |           |
| <chem>CC(=O)Nc1cnc(SSc2ccccc2[N+](=O)[O-])s1</chem>                                                                                                      |           | 1.947 [36] |  |            |           |
| <chem>O=C(N[C@@H](Cc1ccccc1)C(=O)N[C@@H](CC1CCNC1=O)C(=O)C(=O)Nc1ccccc1)\C=C\c1ccccc1</chem>                                                             |           | 1.95 [29]  |  |            | 5n19 [29] |
| <chem>Cc1cc(C)nc(SSc2ccccc2)n1</chem>                                                                                                                    |           | 1.991 [36] |  |            |           |
| <chem>O=C1C(=O)N(Cc2cc3ccccc3s2)c2c1ccccc2[N+](=O)[O-]</chem>                                                                                            |           | 2.0 [43]   |  |            |           |
| <chem>O=C(Cn1nnc2ccccc21)N(Cc1ccsc1)c1ccc(-c2cncc2)cc1</chem>                                                                                            |           | 2.0 [13]   |  |            |           |
| <chem>Nc1ccc(cc1N)C(=O)N[C@@H](Cc1ccccc1)C(=O)Nc1ccc(cc1Cl)[N+](O)=O</chem>                                                                              |           | 2.0 [5]    |  |            |           |
| <chem>[H]N(C(C(C)O)C(=O)N[C@@H](Cc1ccccc1)C(=O)Nc1ccc(cc1Cl)[N+](O)=O)C(=O)CCC(=O)NC(C(C)O)C(=O)NC(CC1=CC=CC=C1)C(=O)NC1=C(Cl)C=C(C=C1)N(=O)=O</chem>    |           | 2.0 [5]    |  |            |           |
| <chem>[H]N(C(C(C)O)C(=O)N[C@@H](Cc1ccccc1)C(=O)Nc1ccc(cc1Cl)[N+](O)=O)C(=O)C(O)CC(=O)NC(C(C)O)C(=O)NC(CC1=CC=CC=C1)C(=O)NC1=C(Cl)C=C(C=C1)N(=O)=O</chem> |           | 2.0 [5]    |  |            |           |

|                                                                                                                                                               |           |            |  |           |           |            |
|---------------------------------------------------------------------------------------------------------------------------------------------------------------|-----------|------------|--|-----------|-----------|------------|
| <chem>[H]N(C(C(C)O)C(=O)N[C@@H](Cc1ccc1)C(=O)Nc1ccc(cc1Cl)[N+](=[O-])=O)C(=O)C(O)C(O)C(=O)NC(C(C)O)C(=O)NC(CC1=CC=CC=C1)C(=O)NC1=C(Cl)C=C(C=C1)N(=O)=O</chem> |           | 2.0 [5]    |  |           |           |            |
| <chem>COC1=C(SC2=NN=NN2C2=CC=C(O)CC3=CC=CC=C3)C=C2)C(=O)NC2=C1C=CC=C2</chem>                                                                                  |           | 2.0 [49]   |  |           |           |            |
| <chem>CC(C)C[C@@H](NC(=O)[C@H](NC(=O)OCC1=CC=CC=C1)C(C)C)C(=O)N[C@H](C[C@H]1CCNC1=O)C(=O)c1nc(C)c(C)s1</chem>                                                 |           | 2.0 [2]    |  |           |           |            |
| <chem>O=[N+](=[O-])c1cccc1SSc1ncs1</chem>                                                                                                                     |           | 2.029 [36] |  |           |           |            |
| <chem>COC(=O)c1nc(SSc2cccc2[N+](=O)[O-])[nH]c1C</chem>                                                                                                        |           | 2.075 [36] |  |           |           |            |
| <chem>CNc1ccc(N(Cc2ccsc2)C(=O)Cn2nnc3cccc32)cc1</chem>                                                                                                        |           | 2.1 [13]   |  |           |           |            |
| <chem>O=C1SN(C)C(N1CC2=CC=CC=C2)=O</chem>                                                                                                                     | 2.15 [50] |            |  |           |           | TDZD-8     |
| <chem>C[C@@H](NC(=O)[C@H](Cc1cccc1)NC(=O)OCc1cccc1)C(=O)CCO</chem>                                                                                            |           |            |  | 2.2 [51]  | 2op9 [51] |            |
| <chem>CCC(C)c1ccc(N(C(=O)c2ccco2)C(C(=O)NC2CCCC2)c2ccnc2)cc1</chem>                                                                                           |           | 2.2 [34]   |  |           |           |            |
| <chem>Fc1ccc(SSc2nccs2)cc1</chem>                                                                                                                             |           | 2.211 [36] |  |           |           |            |
| <chem>CC(C)C[C@H](NC(=O)[C@@H](NC(=O)OCc1cccc1)C(C)C)C(=O)N[C@@H](C[C@@H]1CCNC1=O)C(=O)c1nccs1</chem>                                                         |           |            |  | 2.2 [52]  |           |            |
| <chem>OC[C@H](Cc1cccc1)NC(=O)[C@H](Cc1cccc1)NC(=O)\C=C1cccc1</chem>                                                                                           |           |            |  | 2.24 [53] | 3sn8 [53] |            |
| <chem>CC1CCCCN1S(=O)(=O)c1ccc2c(c1)C(=O)C(=O)N2</chem>                                                                                                        |           | 2.25 [44]  |  |           |           |            |
| <chem>CCOC(=O)/C=C/[C@H](C[C@@H]1CCNC1=O)NC(=O)[C@H](Cc1cccc1)NC(=O)[C@@H](NC(=O)OCc1cccc1)C(C)C</chem>                                                       |           |            |  | 2.26 [14] |           |            |
| <chem>CC(C)(C)OC(=O)Nc1cccn(C(CC2CCC2)C(=O)NC(CC2CCNC2=O)C(=O)C(=O)NC2CC2)c1=O</chem>                                                                         | 2.39 [26] |            |  |           |           |            |
| <chem>CC[Hg]SC1=CC=CC=C1C(=O)O[Na]</chem>                                                                                                                     |           |            |  | 2.4 [25]  |           | Thimerosal |
| <chem>CCOC(=O)c1cccc1SSc1nc(C)cs1</chem>                                                                                                                      |           | 2.452 [36] |  |           |           |            |
| <chem>CCOC(=O)\C=C\C(Cc1cccc1)NC(=O)C(Cc1cccc1)NC(=O)\C=C\c1ccc(cc1)N(=O)=O</chem>                                                                            |           |            |  | 2.48 [37] |           |            |
| <chem>CC1=C(C(=O)OCCc2cccc2)C(c2cccc2[N+](=O)[O-])C2=C(CCCC2=O)N1</chem>                                                                                      |           | 2.5 [54]   |  |           |           |            |



|                                                                                                                                         |           |            |  |          |           |                |
|-----------------------------------------------------------------------------------------------------------------------------------------|-----------|------------|--|----------|-----------|----------------|
| <chem>COc1cccc1-c1cnc(C(=O)[C@H](C[C@@H]2CCNC2=O)NC(=O)[C@H](CC(C)C)NC(=O)OCc2cccc2)s1</chem>                                           |           |            |  | 2.5 [33] |           |                |
| <chem>[O-][N+](=O)C(Br)(CO)CO</chem>                                                                                                    | 4.4 [20]  |            |  | 2.5 [20] |           | Bronopol       |
| <chem>C1C1=CC=C(C=C1)C1C(N2C=CN=C2)C(=NN1C1=CC(Cl)=C(Cl)C=C1)C1=CC=C(Br)C=C1</chem>                                                     |           | 2.5 [55]   |  |          |           |                |
| <chem>Cc1csc(SSc2cccc2[N+](=O)[O-])n1</chem>                                                                                            |           | 2.555 [36] |  |          |           |                |
| <chem>CC(=O)Nc1cnc(SSc2ccc(F)cc2)s1</chem>                                                                                              |           | 2.565 [36] |  |          |           |                |
| <chem>NC1=NC2=NC3=C(SC(N)=N3)C=C2S1</chem>                                                                                              |           | 2.6 [19]   |  |          |           | MAC22272       |
| <chem>CC(=O)Nc1cnc(SSc2ccc(Cl)cc2)s1</chem>                                                                                             |           | 2.626 [36] |  |          |           |                |
| <chem>C1C1=C(NCCN2CCOCC2)C(=O)c2nccc2C1=O</chem>                                                                                        | 2.63 [30] |            |  |          |           | DA-3003-1      |
| <chem>CC(C)C[C@H](NC(=O)C1CCC(=O)N1)C(=O)N[C@@H](C[C@@H]2CCN2C=O)C(=O)c4nc3cccc3s4</chem>                                               |           |            |  | 2.7 [3]  |           |                |
| <chem>CC(=O)N[C@H](C(=O)N[C@H](C(=O)N[C@@H](CC(C)C)C(=O)N[C@@H](C[C@@H]1CCNC1=O)C(=O)Cn1[nH]c(=O)c2cccc2c1=O)C(C)OCc1cccc1)C(C)C</chem> |           | 2.7 [39]   |  |          |           |                |
| <chem>CC(=O)Nc1cnc(SSc2ccc(C)cc2)s1</chem>                                                                                              |           | 2.803 [36] |  |          |           |                |
| <chem>CC1CC(C)CN(S(=O)(=O)c2ccc3c(c2)C(=O)C(=O)N3C)C1</chem>                                                                            |           | 2.820 [44] |  |          |           |                |
| <chem>CC1C(C(C(C(O1)OC2C(C(OC(C2OC(=O)C=CC3=CC(=C(C=C3)O)O)COC4C(C(CO4)(CO)O)O)OCC5=CC(=C(C=C5)O)O)O)O)O</chem>                         | 2.88 [42] |            |  |          |           | Forsythoside B |
| <chem>CC(=O)N[C@H](C(=O)N[C@H](C(=O)N[C@@H](CC(C)C)C(=O)N[C@@H](C[C@@H]1CCNC1=O)C(=O)Cn1[nH]c(=O)c2cccc2c1=O)C(C)O)C(C)C</chem>         |           | 2.9 [39]   |  |          |           |                |
| <chem>CCC(=O)Nc1ccc(N(Cc2ccsc2)C(=O)Cn2nnc3cccc32)cc1</chem>                                                                            |           | 2.9 [13]   |  |          |           |                |
| <chem>CC(C)C[C@@H](NC(=O)[C@H](NC(=O)COC1=CN=CC=C1)C(C)C)C(=O)N[C@H](C[C@H]1CCNC1=O)C(=O)c1nc2=CC=CC=c2s1</chem>                        |           | 2.9 [2]    |  | 0.22 [2] |           |                |
| <chem>FC(F)(F)c1nnc(SC(=O)c2ccc(o2)C#Cc2cccc2)[nH]1</chem>                                                                              |           | 3.0 [31]   |  |          | 2gz8 [31] |                |
| <chem>O=C(CSc1nccc(-c2esc(-c3cccc3)n2)n1)Nc1cc(Cl)cc(Cl)c1</chem>                                                                       |           | 3.0 [56]   |  |          |           |                |

|                                                                                                                                                                                                                                                                                     |           |            |  |            |          |                  |
|-------------------------------------------------------------------------------------------------------------------------------------------------------------------------------------------------------------------------------------------------------------------------------------|-----------|------------|--|------------|----------|------------------|
| <chem>C1=C(C=C(C(=C1O)O)O)C(=O)OC2=CC(=CC(=C2O)O)C(=O)OCC3C(C(C(O3)OC(=O)C4=CC(=C(C(=C4)OC(=O)C5=CC(=C(C(=C5)O)O)O)O)OC(=O)C6=CC(=C(C(=C6)OC(=O)C7=CC(=C(C(=C7)O)O)O)O)OC(=O)C8=CC(=C(C(=C8)OC(=O)C9=CC(=C(C(=C9)O)O)O)O)O)OC(=O)C1=CC(=C(C(=C1)OC(=O)C1=CC(=C(C(=C1)O)O)O)O</chem> |           | 3.0 [57]   |  |            |          | Tannic acid      |
| <chem>C13=C(OC(=CC1=O)C2=CC=C(O)C=C2)C=C(O)C(=C3O)O</chem>                                                                                                                                                                                                                          | 3.02 [42] |            |  |            |          | Scutellarein     |
| <chem>CCOC(=O)\C=C\C(Cc1ccccc1)NC(=O)C(Cc1ccccc1)NC(=O)\C=C1ccc2OCOc2c1</chem>                                                                                                                                                                                                      |           |            |  | 3.046 [37] |          |                  |
| <chem>COC(=O)[C@]1(C)CC[C@]2(C)CC[C@]3(C)C4=CC=C5C(=CC(=O)C(O)=C5C)[C@]4(C)CC[C@@]3(C)[C@@H]2C1</chem>                                                                                                                                                                              |           | 5.5 [41]   |  |            | 3.1 [41] |                  |
| <chem>CC(=O)n1nc(SSc2ccccc2[N+](=O)[O-])nc1C</chem>                                                                                                                                                                                                                                 |           | 3.13 [36]  |  |            |          |                  |
| <chem>CC1C(C(C(C(O1)OCC2C(C(C(C(O2)OCCC3=CC(=C(C=C3)O)O)O)O)OC(=O)C=CC4=CC(=C(C=C4)O)O)O)O</chem>                                                                                                                                                                                   | 3.18 [42] |            |  |            |          | Forsythoside A   |
| <chem>CC(C)C[C@H](NC(=O)Cc1ccccc1)C(=O)N[C@@H](C[C@@H]1CCNC1=O)C(=O)c1nc2ccccc2s1</chem>                                                                                                                                                                                            |           |            |  |            | 3.2 [33] |                  |
| <chem>COc1ccc(NCC(=O)N[C@@H](CC(C)C)C(=O)N[C@@H](C[C@@H]2CCNC2=O)C(=O)c2nc3ccccc3s2)cc1</chem>                                                                                                                                                                                      |           |            |  |            | 3.2 [33] |                  |
| <chem>Cc1cc2ncn(c2cc1C)C9OC(CO)C(OP3(=O)OC(C)CNC(=O)CCC5C4=C(C)C8=NC(=CC7=NC(=C(C)C6=NC(C)(C(N4[Co](O)O3)C5(C)CC(N)=O)C(C)(CC(N)=O)C6CCC(N)=O)C(C)(CC(N)=O)C7CCC(N)=O)C(CCC(N)=O)C8(C)C)C9O</chem>                                                                                  | 3.29 [30] |            |  |            |          | Hydroxocobalamin |
| <chem>COC1=CC=CC=C1\N=C\C1=C(OC(C)=O)OC(=N1)C1=CC=CC=C1</chem>                                                                                                                                                                                                                      |           | 3.3 [55]   |  |            |          |                  |
| <chem>BrC1ccc(SSc2nccs2)cc1</chem>                                                                                                                                                                                                                                                  |           | 3.321 [36] |  |            |          |                  |
| <chem>CC(=O)NC(C(=O)NC(C(=O)NC(CC(C)C)C(=O)NC(CC1CCNC1=O)C(=O)CN1NC(=O)C2C([N+](=O)[O-]))=CC=CC2C1=O)C(C)O)C(C)C</chem>                                                                                                                                                             |           | 3.4 [39]   |  |            |          |                  |
| <chem>COCCC(=O)Nc1ccc(N(C(=O)Cn2nnc3ccccc32)C(C)c2ccsc2)cc1</chem>                                                                                                                                                                                                                  |           | 3.4 [13]   |  |            |          |                  |

|                                                                                                                                 |           |            |  |          |           |
|---------------------------------------------------------------------------------------------------------------------------------|-----------|------------|--|----------|-----------|
| <chem>CC(C)C[C@@H](NC(=O)[C@H](NC(=O)COC1=CC=C(C=C1)N(=O)=O)C(C)C(=O)N[C@H](C[C@H]1CCNC1=O)C(=O)c1nc2=CC=CC=c2s1</chem>         |           | 3.4 [2]    |  |          |           |
| <chem>CC(C)C(=O)Nc1ccc(N(Cc2ccsc2)C(=O)Cn2nnc3cccc32)cc1</chem>                                                                 |           | 3.6 [13]   |  |          |           |
| <chem>CCOC(=O)c1c[nH]c(SSc2ccc(Cl)cc2)n1</chem>                                                                                 |           | 3.675 [36] |  |          |           |
| <chem>CC(C)(C)NC(=O)C(c1ccsc1)N(C(=O)Cn1nnc2cccc21)c1ccc(NC(=O)C2CCC2)cc1</chem>                                                |           | 3.8 [13]   |  |          |           |
| <chem>CC(C)C[C@@H](C=O)NC(=O)[C@H](CC(C)C)NC(=O)[C@H](CC(C)C)NC(=O)OCc1cccc1</chem>                                             | 3.9 [24]  |            |  |          | MG-132    |
| <chem>COC(=O)c1cccc1SSc1nc(C(=O)OC)c(C)[nH]1</chem>                                                                             |           | 3.957 [36] |  |          |           |
| <chem>[H]C(C(SO)C(=O)N[C@@H](Cc1ccc1)C(=O)Nc1ccc(cc1Cl)[N+](=[O-])=O)C(=O)NC(CC1=CC=CC=C1)C(=O)NC1=C(Cl)C=C(C=C1)N(=O)=O</chem> |           | 4 [5]      |  |          |           |
| <chem>CC1=C(O)C(=O)C=C2C1=CC=C1[C@@]3(C)CC[C@@]4(C)CC(=O)[C@H](C)C[C@H]4[C@]3(C)CC[C@@]21C</chem>                               |           | 9.9 [41]   |  | 4 [41]   |           |
| <chem>ClC=1C(=O)C(\Cl)=C(\Cl)C(=O)C=1Cl</chem>                                                                                  | 4.1 [20]  |            |  |          |           |
| <chem>CC(C)C(=O)Nc1ccc(N(C(=O)Cn2nnc3cccc32)C(C(=O)NC(C)(C)C)c2csc2)cc1</chem>                                                  |           | 4.1 [13]   |  |          |           |
| <chem>O=C(Nc1ccc(N(Cc2ccsc2)C(=O)Cn2nnc3cccc32)cc1)C1CC1</chem>                                                                 |           | 4.1 [13]   |  |          |           |
| <chem>COc1ccc(SSc2nc(-c3cccc3)n(C(C)=O)n2)cc1</chem>                                                                            |           | 4.1 [36]   |  |          |           |
| <chem>COC(=O)c1nc(SSc2ccc(Cl)cc2)[nH]c1C</chem>                                                                                 |           | 4.126 [36] |  |          |           |
| <chem>[H][C@]12CN([C@H](C(=O)NC(CC3CC3)C(=O)C(N)=O)[C@@]1([H])C2(C)C)C(=O)[C@@H](NC(=O)NC(C)(C)C)C(C)C</chem>                   | 4.13 [24] |            |  |          | 7brq [58] |
| <chem>CC(=O)n1nc(SSc2ccc(C)cc2)nc1-c1cccc1</chem>                                                                               |           | 4.183 [36] |  |          |           |
| <chem>CC1=C(O)C(=O)C=C2C1=CC=C1[C@@]3(C)CC[C@@]4(C)CC[C@@](C)(C(=O)O)C[C@H]4[C@]3(C)CC[C@@]21C</chem>                           |           | 10.3 [41]  |  | 4.2 [41] |           |
| <chem>Cc1ccc2nc(-c3ccc(N)cc3)sc2c1S(=O)(=O)O</chem>                                                                             |           | 4.3 [44]   |  |          |           |
| <chem>CC1CC(C)CN(S(=O)(=O)c2ccc3c(c2)C(=O)C(=O)N3)C1</chem>                                                                     |           | 4.3 [44]   |  |          |           |

|                                                                                                                                                                    |           |            |  |          |           |                |
|--------------------------------------------------------------------------------------------------------------------------------------------------------------------|-----------|------------|--|----------|-----------|----------------|
| <chem>O=C1Nc2ccc(S(=O)(=O)N3CCCCC3)c2C1=O</chem>                                                                                                                   |           | 4.45 [44]  |  |          |           |                |
| <chem>CCOC(=O)c1cccc1SSc1nc(-c2ccncc2)n(C(C)=O)n1</chem>                                                                                                           |           | 4.511 [36] |  |          |           |                |
| <chem>CNC1=CC=C(C=C1)C(=O)CN1N=N</chem><br><chem>C2=CC=CC=C12</chem>                                                                                               |           |            |  | 4.5 [4]  |           |                |
| <chem>OB(O)C1=CC(=CC(=C1)C(=O)OC1=C</chem><br><chem>C=C(OC(=O)C2=CC(=CC(=C2)B(O)O)</chem><br><chem>N(=O)=O)C=C1)N(=O)=O</chem>                                     |           |            |  | 4.5 [9]  |           |                |
| <chem>CC(C)C[C@H](NC(=O)[C@@H](NC(=</chem><br><chem>O)[C@H](C)NC(=O)OCc1cccc1)C(C</chem><br><chem>)C(=O)N[C@H](C#N)CCC(N)=O</chem>                                 |           | 4.6 [59]   |  |          | 3vb5 [59] |                |
| <chem>COC1=C(C=CC(=C1)C(=S)N2C</chem><br><chem>COCC2)O</chem>                                                                                                      | 4.6 [20]  |            |  |          |           | Vanitiolide    |
| <chem>CC1CC(C)CN(S(=O)(=O)c2cc</chem><br><chem>c3c(c2)C(=O)C(=O)N3Cc2cccc2)C1</chem>                                                                               |           | 4.7 [44]   |  |          |           |                |
| <chem>CC(C)(C)NC(=O)[C@H](N(C(=O)c1cc</chem><br><chem>co1)c1ccc(cc1)C(C)(C)C)c1ccnc1</chem>                                                                        |           | 4.8 [34]   |  |          | 3v3m [34] |                |
| <chem>O=C1C(=O)N(Cc2cc3cccc3s2)c2ccc</chem><br><chem>(F)cc21</chem>                                                                                                |           | 4.82 [43]  |  |          |           |                |
| <chem>CN(C)CCCS1cccc1NC(=O)/C=C/</chem><br><chem>c1cccc1</chem>                                                                                                    |           | 5.0 [13]   |  |          |           |                |
| <chem>Cc1noc(NC(=O)c2ccc(-c3cc(C(F)</chem><br><chem>(F)F)nn3C)s2)c1[N+](=O)[O-]</chem>                                                                             |           | 5.0 [31]   |  |          |           |                |
| <chem>CC(C)(C)NC(=O)C(c1ccnc1)N(C</chem><br><chem>(=O)c1ccc(Cl)o1)c1ccc(C(C)(C)C)cc1</chem>                                                                        |           | 5.2 [34]   |  |          |           |                |
| <chem>CC1C(C(C(C(O1)OCC2C(C(C(C(O2)</chem><br><chem>OCCC3=CC(=C(C=C3)O)O)O)OC(=O)</chem><br><chem>C=CC4=CC(=C(C=C4)O)O)O)O)O</chem>                                | 5.47 [42] |            |  |          |           | Forsythoside I |
| <chem>N#Cc1ccc(N2N=C(c3cccc3)/C(=C/</chem><br><chem>c3ccc(C(=O)O)cc3)C2=O)cc1</chem>                                                                               |           | 5.5 [60]   |  |          |           |                |
| <chem>CC(C)(C)NC(=O)C(c1cncn1)N(C(=O)</chem><br><chem>)c1ccco1)c1ccc(C(C)(C)C)cc1</chem>                                                                           |           | 5.5 [34]   |  |          |           |                |
| <chem>CN1C(=O)C(=O)c2cc(S(=O)(=O)N3CC</chem><br><chem>N(c4cccc4)CC3)ccc21</chem>                                                                                   |           | 5.52 [44]  |  |          |           |                |
| <chem>CCOc1cccc(c1)C(=O)c2ccc(O)c(O)c2O</chem>                                                                                                                     |           | 10.6 [20]  |  | 5.6 [20] |           |                |
| <chem>CCOC(=O)c1cccc1SSc1nc(-c2ccc</chem><br><chem>nc2)n(C(C)=O)n1</chem>                                                                                          |           | 5.654 [36] |  |          |           |                |
| <chem>CC(C)C[C@H](NC(=O)[C@@H](NC</chem><br><chem>(=O)[C@H](C)NC(=O)[C@H](CO)NC</chem><br><chem>(C)=O)C(C)C(=O)N[C@@H](Cc1c[n</chem><br><chem>H]c[nH+]1)C=O</chem> |           | 5.7 [16]   |  |          | 3aw0 [16] |                |
| <chem>CC(=O)N[C@@H](CO)C(=O)N[C@</chem><br><chem>@H](C)C(=O)N[C@H](C(=O)N[C@</chem><br><chem>@H](CC(C)C)C(=O)N[C@H](C=O)Cc1</chem><br><chem>c[nH]cn1)C(C)C</chem>  |           | 5.7 [16]   |  |          |           |                |

|                                                                                                                                                   |           |            |          |           |           |                  |
|---------------------------------------------------------------------------------------------------------------------------------------------------|-----------|------------|----------|-----------|-----------|------------------|
| <chem>CCCCC(NC(=O)C1[C@@H]2[C@H](CN1C(=O)C(NC(=O)NC1(CS(=O)(=O)C(C)(C)C)CCCC1)C(C)(C)C)C2(C)C)C(=O)C(=O)NC1CC1</chem>                             |           | 5.73 [24]  |          |           |           | Narlaprevir      |
| <chem>COc1ccc(SSc2nc(-c3ccnc3)n(C(C)=O)n2)cc1</chem>                                                                                              |           | 5.794 [36] |          |           |           |                  |
| <chem>O[C@H]([C@@H]([C@@H](O)[C@H](C)O)O)[C@H]1OC[C@@H]2[C@H]([C@@H]([C@@H](O)[C@H](OCCC3=CC(O)=C(O)C=C3)O2)OC(/C=C/C4=CC(O)=C(O)C=C4)=O)O</chem> | 5.85 [42] |            |          |           |           | Isoforsythiaside |
| <chem>CC(C)CC(=O)N[C@@H](CC(C)C)C(=O)N[C@@H](C[C@@H]1CCNC1=O)C(=O)c1nc2cccc2s1</chem>                                                             |           |            |          | 5.9 [33]  |           |                  |
| <chem>CC1=C(C2=CC3=NC(=CC4=NC(=CC5=C(C(=C(N5)C=C1N2)C(C)O)C)C(=C4CCC(=O)O)C)C(=C3C)CCC(=O)O)C(C)O</chem>                                          | 3.9 [20]  |            | 5.9 [20] |           |           | Hematoporphyrin  |
| <chem>CCOC(=O)c1cccc1SSc1nc(C(=O)OC)c(C)[nH]1</chem>                                                                                              |           | 5.954 [36] |          |           |           |                  |
| <chem>Nc1ncc(S(=O)(=O)c2ccc(Cl)cc2)c(N)n1</chem>                                                                                                  |           | 6.0 [31]   |          |           |           |                  |
| <chem>CC(C)(C)NC(=O)C(c1ccnc1)N(C(=O)C1=NC=NC1)c1ccc(C(C)(C)C)cc1</chem>                                                                          |           | 6.0 [34]   |          |           |           |                  |
| <chem>OB(O)C1=CC(=CC(=C1)N(=O)=O)C(=O)OCC1=CC=CC=C1COC(=O)C1=CC(=CC(=C1)N(=O)=O)B(O)O</chem>                                                      |           |            |          | 6.0 [9]   |           |                  |
| <chem>N#Cc1c(-c2ccc(Cl)cc2)nc(SCc2ccc([N+](=O)[O-])cc2)[nH]c1=O</chem>                                                                            |           | 6.1 [60]   |          |           |           |                  |
| <chem>CCC(C)(C)NC(=O)[C@H](N(C(=O)Cn1nnc2cccc12)c1ccc(NC(C)=O)cc1)c1cccn1C</chem>                                                                 |           | 6.2 [13]   |          |           | 4mds [13] |                  |
| <chem>O=C(N[C@@H](C1CC1)C(=O)N[C@@H](C[C@@H]1CCNC1=O)C(=O)C(=O)NCc1cccc1)\C=C\c1cccc1</chem>                                                      |           | 6.27 [29]  |          |           |           |                  |
| <chem>O=C3\C=C(/Oc2cc(O[C@@H]1O[C@H](C(=O)O)[C@@H](O)[C@H](O)[C@H]1O)c(O)c(O)c23)c4cccc4</chem>                                                   | 6.41 [42] |            |          |           |           | Baicalin         |
| <chem>CCOC(=O)\C=C\C(Cc1cccc1)NC(=O)C(Cc1cccc1)NC(=O)\C=C\c1ccc(cc1)C1=CC=CC=C1</chem>                                                            |           |            |          | 6.44 [37] |           |                  |

|                                                                                                                                                                                                                                                                            |           |           |  |          |           |                |
|----------------------------------------------------------------------------------------------------------------------------------------------------------------------------------------------------------------------------------------------------------------------------|-----------|-----------|--|----------|-----------|----------------|
| <chem>CC1=C(C=C(C=C1)C(=O)NC2=C3C(=CC(=CC3=C(C=C2)S(=O)(=O)[O-])S(=O)(=O)[O-])S(=O)(=O)[O-])NC(=O)C4=CC(=CC=C4)NC(=O)NC5=CC=CC(=C5)C(=O)NC6=C(C=CC(=C6)C(=O)NC7=C8C(=CC(=CC8=C(C=C7)S(=O)(=O)[O-])S(=O)(=O)[O-])S(=O)(=O)[O-])C.[Na+].[Na+].[Na+].[Na+].[Na+].[Na+]</chem> | 6.5 [30]  |           |  |          |           | Suramin sodium |
| <chem>CC1C(C(C(C(O1)OCC2C(C(C(C(O2)O)O)O)O)O)O)O)O</chem>                                                                                                                                                                                                                  | 6.68 [42] |           |  |          |           | Forsythoside E |
| <chem>COC1=CC=C2NC(C(=O)N[C@@H](C(C)C)C(=O)N[C@@H](C[C@@H]3CCNC3=O)C(=O)c3nc4ccccc4s3)=C(C)C2=C1</chem>                                                                                                                                                                    |           |           |  | 6.7 [3]  |           |                |
| <chem>CCOC(=O)/C=C/[C@H](C[C@@H]1CNC1=O)NC(=O)[C@H](CC(C)C)NC(=O)[C@H](NC(=O)[C@@H](NC(=O)c2cocc2)C(C)C)C(C)C</chem>                                                                                                                                                       |           |           |  | 6.7 [61] | 2amd [61] |                |
| <chem>CCOC(=O)/C=C/[C@H](C[C@@H]1CNC1=O)NC(=O)[C@H](CCC(C)C)NC(=O)[C@@H](NC(=O)[C@H](NC(=O)c1ccco1)C(C)C)C(C)C</chem>                                                                                                                                                      |           |           |  | 6.7 [36] |           |                |
| <chem>CN(C)C1=CC=C(C=C1)C(=O)CN1N=NC2=CC=CC=C12</chem>                                                                                                                                                                                                                     |           |           |  | 6.7 [4]  |           |                |
| <chem>CC(C)C[C@@H](NC(=O)[C@H](NC(=O)COC1=CC=CC=C1)C(C)C)C(=O)N[C@H](C[C@H]1CCNC1=O)C(=O)c1nccs1</chem>                                                                                                                                                                    |           | 6.8 [2]   |  |          |           |                |
| <chem>CC(C)C(C(=O)NC(CC(=O)OC)C(=O)CF)NC(=O)C(CCC(=O)OC)NC(=O)C(CC(=O)OC)NC(=O)OCC1=CC=CC=C1</chem>                                                                                                                                                                        | 6.81 [30] |           |  |          |           | Z-DEVD-FMK     |
| <chem>O=C(O)c1ccc(/C=C2\C(=O)N(c3ccc(F)cc3)N=C2c2ccccc2)cc1</chem>                                                                                                                                                                                                         |           | 6.8 [60]  |  |          |           |                |
| <chem>COC1=CC=C(C=C1)N1C(=O)NC(=O)\C(=C/C2=CC(Cl)=C(OCC3=CC(=C=C3)C(O)=O)C(Cl)=C2)C1=O</chem>                                                                                                                                                                              |           | 6.86 [62] |  |          |           |                |
| <chem>CCC(=O)Nc1ccc(N(C(=O)Cn2nnc3ccc3)C(C(=O)NC(C)(C)C)c2ccsc2)cc1</chem>                                                                                                                                                                                                 |           | 6.9 [13]  |  |          |           |                |
| <chem>COC(=O)c1cc2c(O)cc(C(F)(F)F)nc2o1</chem>                                                                                                                                                                                                                             |           | 7.0 [19]  |  |          |           |                |
| <chem>O[C@@H]1CC2=C(O)C=C(O)C=C2OC1C1=CC2=C(C=C(O)C(O)=C2C(=O)C(O)=C1)C1OC2=C(C[C@@H]1OC(=O)C1=CC(O)=C(O)C(O)=C1)C(O)=CC(O)=C2</chem>                                                                                                                                      |           | 7.0 [57]  |  |          |           | TF2B           |

|                                                                                                                      |                        |           |  |           |           |            |
|----------------------------------------------------------------------------------------------------------------------|------------------------|-----------|--|-----------|-----------|------------|
| <chem>O=C1C=CC(=O)C2=CN(CC3=CC=CC=C3)C=C12</chem>                                                                    |                        | 7.0 [55]  |  |           |           |            |
| <chem>CC1=C(SC2=C1C=C(Cl)C=C2)C(=O)CC1OC(=O)C(Cl)=C1Cl</chem>                                                        |                        | 7.0 [19]  |  |           |           | MAC-30731  |
| <chem>COC1=CC(=O)OC(CS(=O)C2=NC3=C(S2)N=CC=C3)=C1</chem>                                                             |                        | 7.2 [55]  |  |           |           |            |
| <chem>Cc1noc(C)c1CN1C(=O)C(=O)c2c c(C#N)ccc21</chem>                                                                 |                        | 7.2 [43]  |  |           |           |            |
| <chem>CC(C)C[C@H](NC(=O)CCc1cccnc1)C(=O)N[C@@H](C[C@@H]1CCNC1=O)C(=O)c1nc2cccc2s1</chem>                             |                        |           |  | 7.4 [33]  |           |            |
| <chem>CCC1=C(NC2=CC=C(OC)C=C12)C(=O)N[C@@H](CC(C)C)C(=O)N[C@@H](C[C@@H]1CCNC1=O)C(=O)c1nc2cccc2s1</chem>             |                        |           |  | 7.5 [3]   |           |            |
| <chem>CC(C)C[C@@H](NC(=O)[C@H](NC(=O)CNCC1=CC=CC=C1)C(C)C)C(=O)N[C@H](C[C@H]1CCNC1=O)C(=O)c1nc2=CC=CC=c2s1</chem>    |                        | 7.5 [2]   |  |           |           |            |
| <chem>CC(=O)OC1=C(SC2=C(Cl)C(Cl)=CC(Cl)=C2OC(C)=O)C(Cl)=C(Cl)C=C1Cl</chem>                                           |                        | 7.6 [63]  |  |           |           |            |
| <chem>CC(=O)Nc1ccc(N(C(=O)Cn2nnc3cccc32)C(C(=O)NC(C)(C)C)c2c csc2)cc1</chem>                                         |                        | 7.72 [13] |  |           |           |            |
| <chem>O=C(OC1=CN=CC=C1)C1CCCO1</chem>                                                                                |                        | 7.9 [34]  |  |           |           |            |
| <chem>CC1=CC(=O)C2=CC=CC=C2C1=O</chem>                                                                               | 7.96 [35]              |           |  |           |           | Vitamin K3 |
| <chem>O=C(N[C@H](C(N[C@@H](CC(C)C)C(N[C@H](C([H])=O)CCC)=O)=O)CC(C)C)OCC1=CC=CC=C1</chem>                            | 3.14 [24]<br>12.7 [30] |           |  |           |           | MG-115     |
| <chem>CCCN1C(NCC2=CC=C(C=C2)N2N=C(CC2C2=CC=CC=C2)C2=CC=CC=C2)=NC2=CC=CC=C12</chem>                                   |                        | 8.0 [55]  |  |           |           |            |
| <chem>CCCCN1C(NCC2=CC=C(C=C2)N2N=C(CC2C2=CC=CC=C2)C2=CC=CC=C2)=NC2=CC=CC=C12</chem>                                  |                        | 8.1 [55]  |  |           |           |            |
| <chem>O=C(Nc1ccc(N(Cc2ccsc2)C(=O)Cn2nnc3cccc32)cc1)C1CCC1</chem>                                                     |                        | 8.1 [13]  |  |           |           |            |
| <chem>CC(=C)C1CCC2(CCC3(C)C(CCC4C5(C)CCC(O)C(C)(C)C5CCC34C)C12)C(O)=O</chem>                                         |                        | 10.0 [64] |  | 8.2 [64]  |           |            |
| <chem>CC(C)C[C@H](NC(=O)[C@@H](NC(=O)[C@H](CO)NC(=O)[C@H](CCC(O)=O)NC(C)=O)[C@@H](C)O)C(=O)N[C@H](CO)CCC(N)=O</chem> |                        |           |  | 8.27 [53] | 3sne [53] |            |

|                                                                                                                              |            |           |  |            |  |                          |
|------------------------------------------------------------------------------------------------------------------------------|------------|-----------|--|------------|--|--------------------------|
| <chem>O=c1cc(-c2ccc(O)c(-c3c(O)cc(O)c4c(=O)cc(-c5ccc(O)cc5)oc34)c2)oc2cc(O)cc(O)c12</chem>                                   |            | 8.3 [65]  |  | 13.8 [65]  |  |                          |
| <chem>O=C(O)c1ccc(/C=C2\C(=O)N(c3cccc([N+](=O)[O-])c3)N=C2c2ccccc2)cc1</chem>                                                |            | 8.4 [60]  |  |            |  |                          |
| <chem>CC(C)C[C@H](NC(=O)COc1ccc(O)cc1)C(=O)N[C@@H](C[C@@H]1CCNC1=O)C(=O)c1nc2ccccc2s1</chem>                                 |            |           |  | 8.4 [33]   |  |                          |
| <chem>CCN1C(NCC2=CC=C(C=C2)N2N=C(CC2C2=CC=CC=C2)C2=CC=CC=C2)=NC2=CC=CC=C12</chem>                                            |            | 8.4 [55]  |  |            |  |                          |
| <chem>CCCC[C@H](NC(=O)\C=C1cccc1)C(=O)N[C@@H](C[C@@H]1CCNC1=O)C(=O)C(=O)NCc1ccccc1</chem>                                    |            | 8.5 [29]  |  |            |  |                          |
| <chem>CCCC[C@H](NC([C@@H](NC([C@@H](NC(C)=O)CC(C)C=O)CC(C)C)=O)C=O</chem>                                                    | 8.6 [24]   |           |  |            |  | Calpain inhibitor I      |
| <chem>S=C=NCCC1=CC=CC=C1</chem>                                                                                              | 10.13 [35] |           |  |            |  | Phenethyl isothiocyanate |
| <chem>Cc1cc(C(=O)N[C@@H](C)C(=O)N[C@H](C(=O)N[C@@H](CC(C)C)C(=O)N[C@H](/C=C/C(=O)OCc2ccccc2)C[C@@H]2CCNC2=O)C(C)C)no1</chem> |            |           |  | 9.0 [36]   |  |                          |
| <chem>CCOC1=CC=C(C=C1)C(=O)C2=C(C(=C(C=C2)O)O)O</chem>                                                                       | 9.0 [20]   |           |  |            |  |                          |
| <chem>CCOC(=O)\C=C\C(Cc1ccccc1)NC(=O)C(Cc1ccccc1)NC(=O)\C=C1ccc(OC)cc1OC</chem>                                              |            |           |  | 9.049 [37] |  |                          |
| <chem>O=C1OC[C@H](CC2=CC=C3OCOC3=C2)\C1=C/C1=CC=C2OCOC2=C1</chem>                                                            |            | 25 [64]   |  | 9.1 [64]   |  |                          |
| <chem>CC(C)(C)NC(=O)C(c1ccsc1)N(C(=O)Cn1nnc2ccccc21)c1ccc(NC(=O)C2CC2)cc1</chem>                                             |            | 9.1 [13]  |  |            |  |                          |
| <chem>OC(=O)C1=C(C=CC(Br)=C1)C1=C=C(C(O1)\C=C1\C(=O)NN(C1=O)C1=CC(Cl)=C(Cl)C=C1</chem>                                       |            | 9.19 [62] |  |            |  |                          |
| <chem>O=C1C2=C([C@H](NCC3=CC=CC=C3)[C@H](O)C(C)(C)O2)C(C4=C1C=CC=C4)=O</chem>                                                | 9.2 [30]   |           |  |            |  | CAY-10581                |
| <chem>OC1=C(C=C(Cl)C=C1SC1=C(O)C(=CC(Cl)=C1)N(=O)=O)N(=O)=O</chem>                                                           |            | 9.2 [63]  |  |            |  |                          |
| <chem>CCN(CC)C(=S)SSC(=S)N(CC)CC</chem>                                                                                      | 9.35 [47]  |           |  |            |  | Disulfiram               |
| <chem>CSCCC(NC(=O)OCC1=CC=CC=C1)C(=O)NC(CC1CCNC1=O)C(=O)c1nc2=CC=CC=c2s1</chem>                                              |            |           |  | 9.4 [33]   |  |                          |
| <chem>O=C1C(=O)N(Cc2ccc(F)cc2Cl)c2ccc(I)cc21</chem>                                                                          |            | 9.4 [43]  |  |            |  |                          |



|                                                                                                                                                    |           |           |  |          |  |             |
|----------------------------------------------------------------------------------------------------------------------------------------------------|-----------|-----------|--|----------|--|-------------|
| OC1=CC2=C(C[C@H])(OC(=O)C3=CC(O)=C(O)C(O)=C3)C(O2)C2=C3C=C(C=C(O)C(=O)C3=C(O)C(O)=C2)C2OC3=CC(O)=CC(O)=C3C[C@H]2OC(=O)C2=CC(O)=C(O)C(O)=C2)C(O)=C1 |           | 9.5 [57]  |  |          |  | TF3         |
| COC1=CC=C(C=C1)C(C1=C(O)C2=C(OC1=O)C=CC(C)=C2)C1=C(O)C2=C(OC1=O)C=CC(C)=C2                                                                         |           | 9.56 [62] |  |          |  |             |
| OC(=O)CCC=5C1=C\C6=N\C(=C/c3n2[Fe](Cl)N1C(=C\C4=N\C(=C/c2c(C=C)c3C)C(/C)=C4/C=C)/C=5C)C(\C)=C6\CCC(O)=O                                            | 9.68 [66] |           |  |          |  | Hemin       |
| COC(=O)[C@@]1(C)CCc2c1ccc1c2C(=O)C(=O)c2c(C)coc2-1                                                                                                 |           |           |  | 9.7 [67] |  |             |
| COC1=CC2=C(C=C1)C1=NN(C(C1C2)C1=CC(I)=CC=C1)C(C)=O                                                                                                 |           | 9.8 [55]  |  |          |  |             |
| NS(=O)(=O)C1=CC=CC2=C1C(=O)C1=CC=CC(O)=C1C2=O                                                                                                      | 9.84 [30] |           |  |          |  | LLL-12      |
| CN1C(=O)C(=O)c2cc(S(=O)(=O)N3CCOCC3)ccc21                                                                                                          |           | 9.91 [44] |  |          |  |             |
| C1=CC=C2C(=C1)C3=C(N2)C4=[N+](C=C3)C5=CC=CC=C5C4=O                                                                                                 | 9.96 [30] |           |  |          |  | Fascaplysin |
| Cc1ccc(C(=O)N/C(=C/c2ccc(-c3ccc([N+](=O)[O-])cc3)o2)C(=O)NCCCN(C)C)cc1                                                                             |           | 10.0 [63] |  |          |  |             |
| CC(=O)N[C@@H](CC(N)=O)C(=O)N[C@H](C(=O)N[C@@H](CC1CCC(C1)C(=O)N[C@H](C=O)Cc1c[nH]cn1)C(C)C                                                         |           | 10.0 [16] |  |          |  |             |
| Cc1oc(C(C)(C)C)cc1-c1cc(NS(=O)(=O)c2cccs2)[nH]n1                                                                                                   |           | 10.0 [31] |  |          |  |             |
| CC(C)(C)NC(=O)C(c1ccnnc1)N(C(=O)c1cccoc1)c1ccc(C(C)(C)C)cc1                                                                                        |           | 10.0 [34] |  |          |  |             |
| Cn1nc(-c2ccc(-c3ccnc(SCC(=O)Nc4ccc(Cl)cc4)n3)s2)cc1C(F)(F)F                                                                                        |           | 10.0 [56] |  |          |  |             |
| CCOC(=O)/C=C/[C@H](C[C@@H]1CCNC1=O)NC(=O)[C@H](CC(C)C)NC(=O)[C@@H](NC(=O)[C@H](CO)NC(=O)OC(C)(C)C)C(C)C                                            |           | 10.0 [68] |  |          |  |             |
| CC(C)C[C@H](NC(=O)[C@@H](NC(=O)[C@H](C)NC(=O)OCc1cccc1)C(C)C)C(=O)NC(Cc1cccc1)C(=O)C(F)(F)F                                                        |           | 10.0 [33] |  |          |  |             |
| OC1=C(SC2=NN=NN2C2=CC=C(OC3=CC=CC=C3)C=C2)C(=O)NC2=C1C=CC=C2                                                                                       |           | 10.0 [49] |  |          |  |             |
| OC1=CC=C(C=C1)N1N=NN=C1SC1=C(O)C2=C(NC1=O)C=C(Cl)C=C2Cl                                                                                            |           | 10.0 [49] |  |          |  |             |

|                                                                                                                     |            |            |  |           |           |                |
|---------------------------------------------------------------------------------------------------------------------|------------|------------|--|-----------|-----------|----------------|
| <chem>O=C1Nc2ccc(S(=O)(=O)N3CCN(C(=O)c4ccco4)CC3)cc2C1=O</chem>                                                     |            | 10.07 [44] |  |           |           |                |
| <chem>CC1C(C(C(C(O1)OCC2C(C(C(C(O2)O)CCC3=CC(=C(C=C3)O)O)OC(=O)C=CC4=CC(=C(C=C4)O)O)O)O)O)O</chem>                  | 10.17 [42] |            |  |           |           | Forsythoside H |
| <chem>CCCN1C(=O)C(=O)C2=C1C=CC(=C2)C(N)=O</chem>                                                                    | 10.2 [10]  |            |  |           |           |                |
| <chem>CC(C)COC(=O)Nc1ccc(N(Cc2ccsc2)C(=O)Cn2nnc3ccccc32)cc1</chem>                                                  |            | 10.3 [13]  |  |           |           |                |
| <chem>CC[C@H](C)[C@H](NC(=O)OCc1ccc1)C(=O)N[C@@H](CCC(=O)OC(C)(C)C(=O)N[C@@H](C)C(=O)N[C@H](C=O)CC(C)C</chem>       | 10.38 [24] |            |  |           |           | PSI            |
| <chem>CCOC(=O)/C=C/[C@H](C[C@@H]1CNC1=O)NC(=O)[C@H](CC(C)C)NC(=O)[C@@H](NC(=O)[C@H](C)NC(=O)c2cc(C)on2)C(C)C</chem> |            |            |  | 10.7 [61] | 1wof [61] |                |
| <chem>CCCCC(C=O)NC(=O)C(CC(C)C)NC(=O)OCC1=CC=CC=C1</chem>                                                           | 10.69 [24] |            |  |           |           | Calpeptin      |
| <chem>N#Cc1c(-c2cccc([N+](=O)[O-])c2)nc(SCc2ccc([N+](=O)[O-])cc2)[nH]c1=O</chem>                                    |            | 10.6 [60]  |  |           |           |                |
| <chem>O=C(N[C@@H](CC#C)C(=O)N[C@@H](C[C@@H]1CCNC1=O)C(=O)C(=O)NCc1ccccc1)\C=C\c1ccc1</chem>                         |            | 10.68 [29] |  |           |           |                |
| <chem>OC(=O)C1=CC=C(\C=C2/C(=O)N(N=C2C2=CC=CC=C2)C2=CC=CC(Cl)=C2)C=C1</chem>                                        |            | 10.8 [60]  |  |           |           |                |
| <chem>O=N(=O)C1=C(C=CC=C1)C1N(CC1)C1=CC=CC=C1</chem>                                                                |            |            |  | 11.0 [69] |           | MP521          |
| <chem>CC(=O)Nc1ccc(cc1)N([C@H](C(=O)NC(C)(C)C)C1=CSC=C1)C(=O)N1C=C(N=N1)C1=CC=CC=C1</chem>                          |            | 11.0 [13]  |  |           |           |                |
| <chem>CSC1=C(C(C)=C(S1)C1=NC(C)=CS1)C1=NC(SCC(=O)NC2=CC=C(Cl)C=C2)=NC=C1</chem>                                     |            | 11.0 [56]  |  |           |           |                |
| <chem>CC(=O)Nc1ccc(N(C(=O)Cn2cc(-c3ccccc3)nn2)C(C(=O)NC(C)(C)C)c2ccsc2)cc1</chem>                                   |            | 11.0 [13]  |  |           |           |                |
| <chem>C=CCC=CCC=CCCCCCCC1=C(C(=CC=C1)O)C(=O)O</chem>                                                                | 11.04 [30] |            |  |           |           | Anacardic acid |
| <chem>O=C1C(=O)N(Cc2cc3ccccc3s2)c2ccccc(Cl)c21</chem>                                                               |            | 11.2 [43]  |  |           |           |                |
| <chem>FCC(=O)C(NC(=O)C(NC(=O)OCc1ccccc1)Cc2ccccc2)C</chem>                                                          | 11.39 [30] |            |  |           |           | Z-FA-FMK       |
| <chem>CN1CCN(S(=O)(=O)c2ccc3c(c2)C(=O)C(=O)N3C)CC1</chem>                                                           |            | 11.83 [44] |  |           |           |                |

|                                                                                                         |            |            |  |  |  |                      |
|---------------------------------------------------------------------------------------------------------|------------|------------|--|--|--|----------------------|
| <chem>O=[N+](O)c1cc(C(F)(F)F)cc1S(=O)(=O)c1ccc(Cl)cc1</chem>                                            |            | 12.0 [31]  |  |  |  |                      |
| <chem>COC1=CC=C(C=C1)N1N=C(\C(=C\C2=CC=C(C=C2)C(O)=O)C1=O)C1=CC=CC=C1</chem>                            |            | 12.0 [60]  |  |  |  |                      |
| <chem>CSC1=C(C(C)=C(S1)C1=NC(C)=C(S1)C1=NC(SCC(=O)NC2=C(Cl)C=CC=C2)=NC=C1</chem>                        |            | 12.0 [56]  |  |  |  |                      |
| <chem>COc1ncc(-c2ccc(N(Cc3ccsc3)C(=O)Cn3nnc4cccc43)cc2)cn1</chem>                                       |            | 12.5 [13]  |  |  |  |                      |
| <chem>NC(=O)c1ccc2c(c1)C(=O)C(=O)N2Cc1cccc1</chem>                                                      |            | 12.5 [21]  |  |  |  |                      |
| <chem>O=C(Nc1ccc(Cl)cc1)c1ccc(CN2C(=O)C(=O)c3cc(I)ccc32)s1</chem>                                       |            | 12.57 [43] |  |  |  |                      |
| <chem>O=C1Nc2ccc(S(=O)(=O)N3CCOCC3)cc2C1=O</chem>                                                       |            | 12.66 [44] |  |  |  |                      |
| <chem>CCOC(=O)\C=C\C(CC1=CC=CC=C1)NC(=O)C(CC(=O)C(NC(=O)C1=NOC(C)=C1)C(C)C)CC1=CC=CC=C1</chem>          |            | 13.0 [37]  |  |  |  |                      |
| <chem>CC(C)C[C@@H](NC(=O)[C@H](NC(=O)CCC1=CC=CC=C1)C(C)C)C(=O)N[C@H](C[C@H]1CCNC1=O)C(=O)c1nccs1</chem> |            | 13.0 [2]   |  |  |  |                      |
| <chem>ClC1=CC=C(C=C1)C1=CC=C(O1)C(=O)CC1=CN=CC(Br)=C1</chem>                                            |            | 13.0 [70]  |  |  |  |                      |
| <chem>Cc1ccc(S(=O)(=O)c2nc(C)c([N+](=O)[O-])c(C)c2C#N)cc1</chem>                                        |            | 13.0 [31]  |  |  |  |                      |
| <chem>Cc1nc(S(=O)(=O)c2cccc2)c(C#N)c(C)c1[N+](=O)[O-]</chem>                                            |            | 13.0 [31]  |  |  |  |                      |
| <chem>C=C(Cc1cccc(C)c1)C1=CC=C(c2ccc(C)cc2)C1</chem>                                                    |            | 13.0 [34]  |  |  |  |                      |
| <chem>O=C1C(=O)N(Cc2cc3cccc3s2)c2cccc c21</chem>                                                        |            | 13.11 [43] |  |  |  |                      |
| <chem>CC(C)(C)C(=O)Nc1ccc(N(Cc2ccsc2)C(=O)Cn2nnc3cccc32)cc1</chem>                                      |            | 13.3 [13]  |  |  |  |                      |
| <chem>O[C@@H]1[C@@H](O)[C@H](O)[C@@H](CO)O[C@@H]1S[Au]</chem>                                           | 13.32 [66] |            |  |  |  | Aurothioglucose      |
| <chem>CC1(CCC2=C(O1)C3=CC=CC=C3C(=O)C2=O)C</chem>                                                       | 13.33 [30] |            |  |  |  | Beta lapachone       |
| <chem>O=C1C(=O)N(CC2COc3cccc3O2)c2ccc(I)cc21</chem>                                                     |            | 13.5 [43]  |  |  |  |                      |
| <chem>CC1=[N+](C2=C(N1CCOC)C(=O)C3=CC=CC=C3C2=O)CC4=NC=CN=C4.[Br-]</chem>                               | 13.6 [30]  |            |  |  |  | Sepantronium bromide |
| <chem>OC1=C(CC2=C(Cl)C(Cl)=CC(Cl)=C2O)C(Cl)=C(Cl)C=C1Cl</chem>                                          |            | 13.7 [25]  |  |  |  | Hexachlorophene      |

|                                                                                                                                       |            |            |  |           |  |            |
|---------------------------------------------------------------------------------------------------------------------------------------|------------|------------|--|-----------|--|------------|
| [H][C@]12C[C@]1(NC(=O)[C@]1([H])C[C@H](C[C@@]1([H])C(=O)N(C)CCCC\C=C/2)OC1=CC(=NC2=C1C=CC(OC)=C2C)C1=NC(=CS1)C(C)C(=O)NS(=O)(=O)C1CC1 | 13.74 [24] |            |  |           |  | Simeprevir |
| NC1=NC=NC2=C1N=C(N2)C(F)(F)F                                                                                                          |            | 13.9 [71]  |  |           |  |            |
| OC(=O)C1=CC=C(\C=C2/C(=O)N(N=C2C2=CC=CC=C2)C2=CC=C(Cl)C=C2)C=C1                                                                       |            | 13.9 [60]  |  |           |  |            |
| O=C1C(=O)N(Cc2ccccc2)c2ccc(S(=O)(=O)N3CCOCC3)cc21                                                                                     |            | 13.86 [44] |  |           |  |            |
| CN1C(=O)C(=O)c2cc(S(=O)(=O)N3CCN(CC4CCCC4)CC3)ccc21                                                                                   |            | 13.86 [44] |  |           |  |            |
| O=C1C(=O)N(Cc2ccccc2)c2ccc(S(=O)(=O)N3CCCCC3)cc21                                                                                     |            | 14.0 [44]  |  |           |  |            |
| CC(C)C[C@H](NC(=O)C1=CC2=CC=CC=C2O1)C(=O)N[C@@H](C[C@@H]1CCNC1=O)C(=O)c1nc2ccccc2s1                                                   |            |            |  | 14.0 [3]  |  |            |
| CC1=CSC(=N1)C1=NC(=CS1)C1=NC(SCC(=O)NC2=CC=C(Cl)C=C2)=NC=C1                                                                           |            | 14.0 [56]  |  |           |  |            |
| Cc1cccc2c3c(ccc12)C1=C(C(=O)C3=O)[C@@H](C)CO1                                                                                         |            | 14.4 [67]  |  | 11.2 [67] |  |            |
| CCOC(=O)/C=C/[C@H](C[C@@H]1CCNC1=O)NC(=O)[C@H](Cc1ccccc1)NC(=O)[C@@H](NC(=O)[C@H](CO)NC(=O)OC(C)(C)C)C(C)C                            |            | 15.0 [68]  |  |           |  |            |
| CSc1[nH]nc(NC(=O)c2cccs2)c1S(=O)(=O)c1ccccc1                                                                                          |            | 15.0 [31]  |  |           |  |            |
| O=[N+](=[O-])c1ccc(S(=O)(=O)c2ccc(Cl)cc2)[n+](=[O-])c1                                                                                |            | 15.0 [31]  |  |           |  |            |
| CSC1=NNC(NC(=O)C2=CC=CS2)=C1S(=O)(=O)C1=CC=C(Cl)C=C1                                                                                  |            | 15.0 [31]  |  |           |  |            |
| CC(C)CC(NC(=O)OCc1ccccc1)C(=O)NC(CC1=CC=CC=C1)C(=O)C(F)(F)F                                                                           |            | 15.0 [72]  |  |           |  |            |
| C1C1=CC=C(NC(=O)CSC2=NC=CC(=N2)C2=CC(=NO2)C2=CC=CC=C2)C=C1                                                                            |            | 15.0 [56]  |  |           |  |            |
| FC(F)(F)C1=CC=C(NC(=O)CSC2=NC=CC(=N2)C2=CC(=NO2)C2=CC=C(Cl)C=C2Cl)C=C1                                                                |            | 15.0 [56]  |  |           |  |            |
| C1C1=CC=C(NC(=O)CSC2=NC=CC(=N2)C2=CC(=NO2)C2=CC=CC=C2Cl)C=C1                                                                          |            | 15.0 [56]  |  |           |  |            |

|                                                                                                                               |            |            |  |           |  |            |
|-------------------------------------------------------------------------------------------------------------------------------|------------|------------|--|-----------|--|------------|
| <chem>CC(C)[C@H](N1CCCNC1=O)C(=O)N[C@H](C[C@H](O)[C@H](CC1=CC=CC=C1)NC(=O)COC1=C(C)C=CC=C1C)CC1=CC=CC=C1</chem>               |            |            |  | 15.0 [73] |  | Lopinavir  |
| <chem>CCC[C@@H](C(=O)C(=O)NC1CC1)NC(=O)[C@@H]2[C@H]3CCC[C@H]3CN2C(=O)[C@H](C(C)(C)C)NC(=O)[C@H](C4CCCC4)NC(=O)c5cnccn5</chem> | 15.25 [66] |            |  |           |  | Telaprevir |
| <chem>O=C(ON1C(=O)CCC1=O)C1=CC2=C(C=C1)N(CC1=CC=CC=C1)C(=O)C2=O</chem>                                                        | 15.5 [10]  |            |  |           |  |            |
| <chem>CC(=CCC(C1=CC(=O)C2=C(C=CC(=C2C1=O)O)O)O)C</chem>                                                                       | 15.75 [47] |            |  |           |  | Shikonin   |
| <chem>CC1(C)CC(=O)c2c(NC3CCCC3)sc(C#N)c2C1</chem>                                                                             |            | 16.0 [31]  |  |           |  |            |
| <chem>O=C(O)c1ccc(S(=O)(=O)c2cc(Br)c(O)c(Br)c2)cc1</chem>                                                                     |            | 16.0 [31]  |  |           |  |            |
| <chem>CCOC(=O)/C(C#N)=C/Nc1ccc(S(=O)(=O)c2ccc(/N=C/C(C#N)=C(O)OCC)cc2)cc1</chem>                                              |            | 16.0 [31]  |  |           |  |            |
| <chem>CC(=O)c1cccc1S(=O)(=O)c1cccc1C(=O)O</chem>                                                                              |            | 16.0 [31]  |  |           |  |            |
| <chem>OB(O)C1=CC=CC(COC(=O)C2=CC(=CC(=C2)B(O)O)N(=O)=O)=C1</chem>                                                             |            |            |  | 16.0 [9]  |  |            |
| <chem>C1C1=CC=C(C=C1)C1=C(C#N)C(=O)NC(SCCC2=CC=CC=C2)=N1</chem>                                                               |            | 16.9 [60]  |  |           |  |            |
| <chem>O=C1C(C)=CC(C2=C1C=CC=C2O)=O</chem>                                                                                     | 17.1 [20]  |            |  |           |  | Plumbagin  |
| <chem>Cc1cc2cc(CN(CC3CCCC3)C(=O)NC3CCCC3)c(=O)[nH]c2cc1C</chem>                                                               |            | 17.2 [74]  |  |           |  |            |
| <chem>CCOC(=O)C1=CC=C(C=C1)N2C(=O)/C(=C\C3=CC=C(O3)[N+](=O)[O-])/C(=O)N2</chem>                                               | 17.38 [66] |            |  |           |  | PYR-41     |
| <chem>O=C1C(=O)N(Cc2ccc(C(=O)N3CCCC3)s2)c2ccc(I)cc21</chem>                                                                   |            | 17.5 [43]  |  |           |  |            |
| <chem>CCCCN1C(=O)C(=O)C2=C1C=CC(=C2)C(N)=O</chem>                                                                             | 17.8 [10]  |            |  |           |  |            |
| <chem>CC1CCN(S(=O)(=O)c2ccc3c(c2)C(=O)C(=O)N3Cc2ccc3cccc3c2)CC1</chem>                                                        |            | 17.82 [31] |  |           |  |            |
| <chem>OCCSC1=C(SCCO)C(=O)C2=CC=CC=C2C1=O</chem>                                                                               | 17.93 [30] |            |  |           |  | NSC 95397  |
| <chem>CSc1nn(-c2c([N+](=O)[O-])c(C)nn2C)c(-c2cccs2)c1C#N</chem>                                                               |            | 18.0 [31]  |  |           |  |            |
| <chem>O=[S](=O)(Cc1[s+]cc(n1[H])c2ccc([Cl])[s]2)c3ccc[s]3</chem>                                                              |            | 18.0 [31]  |  |           |  |            |

|                                                                                                                                                                                                                            |            |           |  |           |  |              |
|----------------------------------------------------------------------------------------------------------------------------------------------------------------------------------------------------------------------------|------------|-----------|--|-----------|--|--------------|
| <chem>CCOC(=O)C1OC1C(=O)N(CCC(N)=O)NC(=O)[C@H](CC1=CC=CC=C1)NC(=O)C(CC(C)C)NC(=O)OCC1=CC=CC=C1</chem>                                                                                                                      |            | 18.0 [75] |  |           |  |              |
| <chem>CSC1=NN(C2=C(C(C)=NN2C)N(=O)=O)C(C2=CC=CS2)=C1C#N</chem>                                                                                                                                                             |            | 18.0 [31] |  |           |  |              |
| <chem>C1C1=CC=C(S1)C1=CSC(CS(=O)=O)C2=CC=CS2)=N1</chem>                                                                                                                                                                    |            | 18.0 [31] |  |           |  |              |
| <chem>OC(=O)C1=CC=C(\C=C2/C(=O)N(N=C2C2=CC=CC=C2)C2=CC=CC=C2)C=C1</chem>                                                                                                                                                   |            | 18.0 [60] |  |           |  |              |
| <chem>CC1=CC2=C(C=C1C)N(C=N2)C3C(C(C(O3)CO)OP(=O)(O)OC(C)CNC(=O)CCC4(C(C5C6(C(C(C(=N6)C(=C7C(C(C(=N7)C=C8C(C(C(=N8)C(=C4[N-]5)C)CCC(=O)N)(C)C)CCC(=O)N)(C)CC(=O)N)C)CCC(=O)N)(C)CC(=O)N)C)CC(=O)N)C)O.[C-]#N.[Co+2]</chem> | 18.02 [30] |           |  |           |  | Vitamin B12  |
| <chem>CN1C=NC2=C1C=CC(NC(=O)C1=C=C(C(Cl)C=C1)=C2</chem>                                                                                                                                                                    |            | 18.2 [71] |  |           |  |              |
| <chem>O=C(CSc1nc(C2CCCCC2)nc2ccc cc12)NCc1ccco1</chem>                                                                                                                                                                     |            | 18.2 [74] |  |           |  |              |
| <chem>O=C1/C(C=C(C2=CC=CC=C2)N1C3=CC=C(C(O)=O)C=C3)=C\C4=CC=C(C5=CC=C([N+])([O-])=O)C=C5)O4</chem>                                                                                                                         | 18.28 [30] |           |  |           |  | 4E1RCat      |
| <chem>CCCCN1C(=O)C(=O)c2cc(C(N)=O)ccc21</chem>                                                                                                                                                                             |            | 19.0 [21] |  |           |  |              |
| <chem>CC1=CC(=CC(=C1C2=CC=C(C=C2)C(C)(C)C)OC(CCC(F)(F)F)C3=CC=C(C=C3)C(=O)NCCC(=O)O</chem>                                                                                                                                 | 19.18 [30] |           |  |           |  | Adomeglivant |
| <chem>O=c1cc(-c2ccc(O)c(O)c2)oc2cc(O)cc(O)c12</chem>                                                                                                                                                                       |            | 20.0      |  |           |  |              |
| <chem>Cc1mn(C)c(NCc2ccc(-c3cccs3)s2)c1[N+](=O)[O-]</chem>                                                                                                                                                                  |            | 20.0 [31] |  |           |  |              |
| <chem>CN1N=C(C)C(=C1NCC1=CC=C(S1)C1=CC=CS1)N(=O)=O</chem>                                                                                                                                                                  |            | 20.0 [31] |  |           |  |              |
| <chem>FC(F)(F)C(=O)C(CC1=CC=CC=C1)NC(=O)C(CC1=CC=CC=C1)NC(=O)OCc1ccccc1</chem>                                                                                                                                             |            | 20.0 [72] |  |           |  |              |
| <chem>COC1=CC=C(C=C1)C1=C(C#N)C(=O)NC(SCCC2=CC=CC=C2)=N1</chem>                                                                                                                                                            |            | 20.3 [76] |  |           |  |              |
| <chem>COC1=CC=C(C=C1)C1=C(C#N)C(=O)NC(SCCC2=CC=CC=C2)=N1</chem>                                                                                                                                                            | 20.49 [30] |           |  |           |  | TBB          |
| <chem>CC(C)C[C@H](NC(=O)[C@@H](NC(=O)OCc1ccccc1)C(C)C(=O)N[C@@H](CCC(=O)N1CCOCC1)C(=O)C(F)(F)F</chem>                                                                                                                      |            |           |  | 21.0 [52] |  |              |

|                                                                                                                                 |            |            |  |          |  |                        |
|---------------------------------------------------------------------------------------------------------------------------------|------------|------------|--|----------|--|------------------------|
| <chem>O=C2N[C@]7(C(=O)O)C[C@H]7/C=C\CCCC[C@H](NC(=O)OC1CCCC1)C(=O)N6[C@H]2C[C@H](Oc3cc(nc4c3ccc(OC)c4)c5nc(sc5)NC(C)C)C6</chem> | 20.77 [66] |            |  |          |  | Ciluprevir             |
| <chem>CC(C)C1=Cc2ccc3c(c2C(=O)C1=O)CC3(C)C</chem>                                                                               |            | 21.1 [67]  |  |          |  |                        |
| <chem>CCC(C)SSC1=NC=CN1</chem>                                                                                                  | 21.39 [47] |            |  |          |  | PX-12                  |
| <chem>COC1=CC(\C=C2/S\C(=N\C3=CC=CC=C3)N(C2=O)C2=CC=CC=C2)=CC=C1OCC1=CC=CC(=C1)C(O)=O</chem>                                    |            | 21.49 [62] |  |          |  |                        |
| <chem>CC1=C(C=C(C=C1)N2C(=O)C(=C(N2)C)N=NC3=CC=CC(=C3O)C4=CC(=CC=C4)C(=O)O)C.C(CO)N.C(CO)N</chem>                               | 21.52 [30] |            |  |          |  | Eltrombopag<br>olamine |
| <chem>C1=CC=C(C=C1)C(CN(CCCOC2=C(C=CC(=C2)CC(=O)O)CC3=C(C=C(C=C3)C(F)(F)F)Cl)C4=CC=CC=C4</chem>                                 | 21.52 [30] |            |  |          |  | GSK-3965               |
| <chem>OC(C(Br)=C1)=C(Br)C=C1/C=C(C2=CC(I)=CC=C2N3)\C3=O</chem>                                                                  | 21.52 [30] |            |  |          |  | GW5074                 |
| <chem>C1=C(C(=C(C(=C1)Cl)Cl)CC2=C(C(=CC(=C2)Cl)Cl)O)O)Cl</chem>                                                                 | 21.52 [30] |            |  |          |  | Hexachlorophene        |
| <chem>C1C(C=C3)=CC=C3CN(C(C(C)C(O)=O)C)=C2SC(C)(C)C1=C2C=C(C(C)C)C=C1</chem>                                                    | 21.52 [30] |            |  |          |  | MK-886                 |
| <chem>Cc1c(O)c(O)cc2c1CC=C1[C@@]3(C)CC[C@@]4(C)CC[C@@](C)(C(=O)O)C[C@H]4[C@]3(C)CC[C@]12C</chem>                                |            | 21.7 [41]  |  |          |  |                        |
| <chem>COC1=CC=C(OCC(=O)N[C@H](C(C)C)C(=O)N[C@H](CC(C)C)C(=O)N[C@H](C[C@H]2CCNC2=O)C(=O)c2ncc(s2)C2=CC3=CC=CC=C3C=C2)C=C1</chem> |            |            |  | 22.0 [2] |  |                        |
| <chem>O=C(Nc1ccc(N(Cc2ccsc2)C(=O)Cn2nnc3ccccc32)cc1)C1CCCC1</chem>                                                              |            | 22.1 [13]  |  |          |  |                        |
| <chem>FC(F)(F)c3c(F)cc(c1nc(c(s1)C)Sc2cc(c(OCC(=O)O)cc2)C)C)cc3</chem>                                                          | 22.27 [30] |            |  |          |  | GW-0742                |
| <chem>Cc1coc2c1C(=O)C(=O)c1c-2ccc2c1CC2(C)CO</chem>                                                                             |            | 24.8 [67]  |  |          |  |                        |
| <chem>CC(C)(C)NC(=O)C(c1ccsc1)N(C(=O)Cn1nnc2ccccc21)c1ccc(NC(=O)C(C)(C)C)cc1</chem>                                             |            | 22.5 [13]  |  |          |  |                        |
| <chem>CC\1=C(/C/2=C/C3=N/C(=C\C4=C(C=C(N4)/C=C\5/C(=C(C(=N5)/C=C1\N2)C=C)C=C)C)/C(=C3CCC(=O)O)C)CCC(=O)O</chem>                 | 23.0 [20]  |            |  |          |  | Protoporphyrin<br>IX   |
| <chem>CC(C)C[C@H](NC(=O)CN1C(=O)CS1=SC(=O)N[C@@H](CC1=CC=CC=C1)[C@H](O)C[C@H](CC1=CC=C(C=C1)NC(=O)COC1=C(C)C=CC=C1C</chem>      |            | 23.0 [38]  |  |          |  |                        |

|                                                                                                                                                                                                                                                  |            |                        |  |           |  |             |
|--------------------------------------------------------------------------------------------------------------------------------------------------------------------------------------------------------------------------------------------------|------------|------------------------|--|-----------|--|-------------|
| <chem>CC(C)C[C@H](NC(=O)OC(C)(C)C(=O)N[C@@H](C[C@@H]1CCNC1=O)C(=O)c1nc2ccccc2s1</chem>                                                                                                                                                           |            |                        |  | 23.0 [33] |  |             |
| <chem>O=C1C(=O)N(C/C=C/c2cc3ccccc3s2)c2ccc(I)cc21</chem>                                                                                                                                                                                         |            | 23.5 [43]              |  |           |  |             |
| <chem>O=C(\C=C1ccc(O)c(OC)c1)CC(=O)\C=C2cc(OC)c(O)cc2</chem>                                                                                                                                                                                     |            | 23.5 [41]<br>40.0 [64] |  |           |  | Curcumin    |
| <chem>CCCCCCCCCCCCCCCC(C(=O)O)C(CC(=O)O)(C(=O)O)O</chem>                                                                                                                                                                                         | 23.54 [30] |                        |  |           |  | Agaric acid |
| <chem>O=c1c(O)c(-c2ccc(O)c(O)c2)oc2cc(O)cc(O)c12</chem>                                                                                                                                                                                          |            | 23.8 [65]              |  |           |  | Quercetin   |
| <chem>CC(C)C[C@H](NC(=O)C1=CC=CC=CC=C2N1)C(=O)N[C@@H](CC1=CC=CC=C1)C(O)C[C@H](CC1=CC=CC=C1)NC(=O)COC1=C(C)C=CC=C1C</chem>                                                                                                                        |            | 24.0 [38]              |  |           |  |             |
| <chem>COC1=CC=C(\C=C\C(=O)NC(CC(C)C)C(=O)N[C@H](CC2=CC=CC=C2)C(O)C[C@H](CC2=CC=CC=C2)NC(=O)COC2=C(C)C=CC=C2C)C=C1</chem>                                                                                                                         |            | 24.0 [38]              |  |           |  |             |
| <chem>CC(C)C[C@@H](NC(=O)[C@H](NC(C)=O)C(C)C)C(=O)N[C@H](C[C@@H]1CCNC1=O)C(=O)c1nccs1</chem>                                                                                                                                                     |            | 24.0 [2]               |  |           |  |             |
| <chem>CC1OC(OC2=C(OC3=C(C(O)=CC(O)=C3)C2=O)C2=CC=C(O)C(O)=C2)C(O)C(O)C1O</chem>                                                                                                                                                                  |            | 24.14 [77]             |  |           |  |             |
| <chem>C[C@H]1[C@@H]([C@@](C[C@@H](O1)O[C@H]2[C@H]3C(=O)N[C@H](C4=C(C(=CC(=C4)O)O)C5=C(C=CC(=C5)[C@H](C(=O)N3)NC(=O)[C@H]6C7=CC(=C(C(=C7)OC8=C(C=C(C=C8)[C@H]([C@H](C(=O)N[C@H](C(=O)N6)CC(=O)N)NC(=O)[C@@H](CC(C)C)NC)O)Cl)O[C@H]9[C@@H])</chem> | 24.15 [30] |                        |  |           |  | Oritavancin |
| <chem>OC(C[C@H](C#CC)C(C=C1)=CC=C1OCC2=CC(C3=CC=C(C(F)(F)F)C=C3)=CC=C2)=O</chem>                                                                                                                                                                 | 24.15 [30] |                        |  |           |  | AMG-837     |
| <chem>OC(=O)C1=CC=C(\C=C2/C(=O)N(N=C2C2=CC=CC=C2)C2=CC=C(Cl)C(Cl)=C2)C=C1</chem>                                                                                                                                                                 |            | 24.3 [60]              |  |           |  |             |
| <chem>COC1=CC2=CC=C(C=C2C=C1)C1=C(C(=NN1[C@@H](C)C1=CC=C(C=C1)C(=O)NCCC(O)=O)C1=CC(Cl)=CC(Cl)=C1</chem>                                                                                                                                          | 24.33 [30] |                        |  |           |  | MK-0893     |
| <chem>NC(=O)C1=CC2=C(C=C1)N(CC1=C C3=CC=C(C=C3C=C1)C1=CC=CC=C1)C(=O)C2=O</chem>                                                                                                                                                                  | 24.9 [10]  |                        |  |           |  |             |



|                                                                                                                                                                            |            |           |  |           |  |        |
|----------------------------------------------------------------------------------------------------------------------------------------------------------------------------|------------|-----------|--|-----------|--|--------|
| O=C1NC2=CC(C3=CC=CC=C3)=CC=C2/C1=C\C4=C(C)C(CCC(O)=O)=C(C)N4                                                                                                               | 24.97 [30] |           |  |           |  | SU 16f |
| CC(C)C[C@H](NC(=O)C1=CC=C(O1)N(=O)=O)C(=O)N[C@@H](CC1=CC=CC=C1)C(O)C[C@H](CC1=CC=CC=C1)NC(=O)COC1=C(C)C=CC=C1C                                                             |            | 25.0 [38] |  |           |  |        |
| CC(C)C[C@H](NC(=O)C1=CC(C)=C=C1)C(=O)N[C@@H](CC1=CC=CC=C1)C(O)C[C@H](CC1=CC=CC=C1)NC(=O)COC1=C(C)C=CC=C1C                                                                  |            | 25.0 [38] |  |           |  |        |
| CC(C)CC(NC(=O)C1=CC=C(C=C1)C(F)(F)F)C(=O)N[C@H](CC1=CC=CC=C1)C(O)C[C@H](CC1=CC=CC=C1)NC(=O)COC1=C(C)C=CC=C1C                                                               |            | 25.0 [38] |  |           |  |        |
| CC(C)CC(NC(=O)C1=CCOC2=CC=C(CCI)C=C12)C(=O)N[C@H](CC1=CC=CC=C1)C(O)C[C@H](CC1=CC=CC=C1)NC(=O)COC1=C(C)C=CC=C1C                                                             |            | 25.0 [38] |  |           |  |        |
| CCCN1C(=O)C(=O)c2cc(C(N)=O)ccc21                                                                                                                                           |            | 25.0 [21] |  |           |  |        |
| O=[N+](([O-])c1ccc(S(=O)(=O)c2ccc([N+](=O)[O-])cc2)cc1                                                                                                                     |            | 25.0 [31] |  |           |  |        |
| CC(C)(C)NC(=O)C(c1ccsc1)N(C(=O)Cn1nnc2ccccc21)c1ccc(NS(C)(=O)=O)cc1                                                                                                        |            | 25.3 [13] |  |           |  |        |
| CC(NC(=O)[C@H](CC1=CC=CC=C1)NC(=O)OCC1=CC=CC=C1)C(=O)CF                                                                                                                    |            |           |  | 25.7 [32] |  |        |
| CC(C)(C)NC(=O)C(c1ccsc1)N(C(=O)Cn1nnc2ccccc21)c1ccc(NC(=O)c2ccno2)cc1                                                                                                      |            | 26.0 [13] |  |           |  |        |
| COc1ccc(-c2nc(SCc3ccc([N+](=O)[O-])cc3)[nH]c(=O)c2C#N)cc1                                                                                                                  |            | 26.3 [76] |  |           |  |        |
| OC1=C(C(O)=O)C(CCC2=CC=C(CCC(CCCC)C=C2)=CC=C1                                                                                                                              | 27.1 [30]  |           |  |           |  | MG-149 |
| O=C(C1=CC(O)=C(O)C(O)=C1)O[C@H]([C@@H]([C@@H](COC(C2=CC(O)=C(O)C(O)=C2)=O)O3)OC(C4=CC(O)=C(O)C(O)=C4)=O)[C@H]([C@@H]3OC(C5=CC(O)=C(O)C(O)=C5)=O)OC(C6=CC(O)=C(O)C(O)=C6)=O | 27.77 [30] |           |  |           |  |        |
| CC(C)CC(NC(=O)C(NC(=O)C(NC(C)=O)C(C)C)C(C)O)C(=O)NC(CCC(=O)N(C)C)C(=O)CN1NC(=O)C2=C(C=C=C2)C1=O                                                                            |            | 28.0 [39] |  |           |  |        |
| FC(C(=O)C1=CC=C(O1)C1=CC=C(C1)C=C1)C1=CN=CC(Br)=C1                                                                                                                         |            | 28.0 [70] |  |           |  |        |
| CC(C)c1ccc(cc1)N([C@@H](C(=O)NC(C)(C)C)c1ccnc1)C(=O)c1ccc1                                                                                                                 |            | 28.1 [34] |  |           |  |        |

|                                                                                                                        |            |  |  |           |  |           |
|------------------------------------------------------------------------------------------------------------------------|------------|--|--|-----------|--|-----------|
| <chem>O=C(NC2=CC(C(F)(F)F)=CC(C(F)(F)F)=C2)C1=C(C(F)(F)F)N=C(Cl)N=C1</chem>                                            | 28.85 [30] |  |  |           |  | SP 100030 |
| <chem>CC[C@@H](C)[C@H](NC(=O)OCc1ccc1)C(=O)N[C@@H](C[C@H]1CCNC1=O)C(=O)c1nc2ccccc2s1</chem>                            |            |  |  | 29.0 [33] |  |           |
| <chem>CCCC1=NC(SCC(=O)NC2=CC=C(Cl)C=C2)=NC(O)=C1</chem>                                                                | 30.0 [56]  |  |  |           |  |           |
| <chem>OC1COC(OC2=C(OC3=C(C(O)=CC(O)=C3)C2=O)C2=CC=C(O)C(O)=C2)C(O)C1O</chem>                                           | 31.62 [77] |  |  |           |  |           |
| <chem>O=C1Nc2ccc(S(=O)(=O)N3CCN(Cc4cccc(Cl)c4)CC3)cc2C1=O</chem>                                                       | 31.71 [44] |  |  |           |  |           |
| <chem>CCOC(=O)C(=CNc1ccc(S(=O)(=O)c2ccc(/N=C/C(C(=O)OCC)=C(\O)OC)cc2)cc1)C(=O)OCC</chem>                               | 32.0 [31]  |  |  |           |  |           |
| <chem>COc1cc(CN2CCN(S(=O)(=O)c3ccc4c(c3)C(=O)C(=O)N4)CC2)cc(OC)c1OC</chem>                                             | 32.08 [44] |  |  |           |  |           |
| <chem>COc1cc(O)c2c(=O)cc(-c3ccc(OC)c(-c4c(O)cc(O)c5c(=O)cc(-c6ccc(O)cc6)oc45)c3)oc2c1</chem>                           | 32.0 [65]  |  |  | 30.2 [65] |  |           |
| <chem>CC(C)C[C@H](NC(=O)[C@@H](NC(=O)OCc1cccc1)C(C)C)C(=O)N[C@@H](CCC(=O)N(C)Cc1cccc1)C(=O)C(F)(F)F</chem>             |            |  |  | 34.1 [52] |  |           |
| <chem>O=C1Nc2ccc(S(=O)(=O)N3CCN(CCc4cccc4)CC3)cc2C1=O</chem>                                                           | 34.91 [44] |  |  |           |  |           |
| <chem>CC(C)C[C@H](NC(=O)CSC1=CC=CC=N1)C(=O)N[C@@H](CC1=CC=CC=C1)C(O)C[C@H](CC1=CC=CC=C1)NC(=O)COC1=C(C)C=CC=C1C</chem> | 35.0 [38]  |  |  |           |  |           |
| <chem>O=C1NC(SCC2=CC=C(C=C2)N(=O)=O)=NC(C2=CC=CC=C2)=C1C#N</chem>                                                      | 35.2 [76]  |  |  |           |  |           |
| <chem>CC(C)C[C@@H](NC(=O)[C@H](NC(=O)OCc1ccc(cc1)N(=O)=O)C(C)C)C(=O)N[C@H](C[C@H]1CCNC1=O)C(=O)c1nccs1</chem>          | 36 [2]     |  |  |           |  |           |
| <chem>CCC(=C)C(=O)C1=C(Cl)C(Cl)=C(OCC(=O)NC(C)(C)C(N)=O)C=C1</chem>                                                    |            |  |  | 35.3 [78] |  |           |
| <chem>COc1ccc(-c2cc(=O)c3c(O)cc(O)c(-c4cc(-c5cc(=O)c6c(O)cc(OC)cc6o5)ccc4OC)c3o2)cc1</chem>                            | 38.4 [65]  |  |  | 35.6 [65] |  |           |
| <chem>CC(C)C[C@H](NC(=O)[C@@H](NC(=O)[C@H](C)NC(=O)[C@H](CO)NC(C)=O)C(C)C)C(=O)N[C@@H](CCC(=O)N(C)C)C=O</chem>         | 37.0 [16]  |  |  |           |  |           |

|                                                                                                                              |            |            |  |           |           |                  |
|------------------------------------------------------------------------------------------------------------------------------|------------|------------|--|-----------|-----------|------------------|
| <chem>Cc1ccc(-c2cnc(C(=O)[C@H](C[C@@H]3CCNC3=O)NC(=O)[C@H](CC(C)C)NC(=O)OCc3ccccc3)s2)cc1</chem>                             |            |            |  | 37.0 [33] |           |                  |
| <chem>CN(C)CCCNC(=O)\C(=C\c1oc(cc1)c2cccc(c2)[N+](=O)[O-])\NC(=O)c3ccc(C)cc3</chem>                                          |            | 38.57 [79] |  | 9.11 [79] |           |                  |
| <chem>CCOC(=O)\C=C\C(CC1=CC=CC=C1)NC(=O)C(CC1=CC=C(F)C=C1)NC(=O)C(NC(=O)C1=NOC(C)=C1)C(C)C</chem>                            |            | 39.0 [37]  |  |           |           |                  |
| <chem>CC(C)C[C@H](NC(=O)[C@@H](NC(=O)[C@H](C)NC(=O)C(CO)NC(=O)C(NC(=O)OCc1ccccc1)C(C)O)C(C)C(=O)N[C@@H](CCC(N)=O)C=N</chem>  |            | 39.0 [59]  |  |           | 3vb6 [59] |                  |
| <chem>CC(C)(C)NC(=O)C(c1ccnc1)N(C(=O)c1cnco1)c1ccc(C(C)(C)C)cc1</chem>                                                       |            | 39.0 [34]  |  |           |           |                  |
| <chem>Cc1coc2c1C(=O)C(=O)c1c-2ccc2c(C)cccc12</chem>                                                                          |            | 38.7 [67]  |  | 13.7 [67] |           |                  |
| <chem>NC(=O)CC1=CC2=C(C=C1)N(CC1=C3=CC=CC=C3C=C1)C(=O)C2=O</chem>                                                            | 39.2 [10]  |            |  |           |           |                  |
| <chem>O=C(O)[C@]2(O)C[C@@H](O)[C@@H](O)[C@H](OC(=O)\C=C\c1ccc(O)c(O)c1)C2</chem>                                             | 39.48 [42] |            |  |           |           | Chlorogenic acid |
| <chem>O=C1C(=O)N(Cc2ccc3ccccc3c2)c2ccc(S(=O)(=O)N3CCOCC3)cc21</chem>                                                         |            | 39.87 [44] |  |           |           |                  |
| <chem>O=C(Cc1nccs1)c1nccs1</chem>                                                                                            |            | 40.0 [31]  |  |           |           |                  |
| <chem>CC(C)CC(NC(=O)OC(C)(C)C(=O)NC(C)C(=O)C(F)(F)F</chem>                                                                   |            | 40.0 [72]  |  |           |           |                  |
| <chem>CC(C)C[C@H](NC(=O)CC1=CC2=CC=CC=C2C=C1)C(=O)N[C@@H](CC1=CC=CC=C1)C(O)C[C@H](CC1=CC=C=C1)NC(=O)COC1=C(C)C=CC=C1C</chem> |            | 40.0 [38]  |  |           |           |                  |
| <chem>CC(C)CC(NC(=O)CCNC(=O)OC(C)(C)C(=O)N[C@H](CC1=CC=CC=C1)C(O)C[C@@H](CC1=CC=CC=C1)NC(=O)COC1=C(C)C=CC=C1C</chem>         |            | 40.0 [38]  |  |           |           |                  |
| <chem>CC(C)CC(NC(=O)COC1=CC2=CC=C=C2C=C1)C(=O)N[C@H](CC1=CC=CC=C1)C(O)C[C@@H](CC1=CC=C=C1)NC(=O)COC1=C(C)C=CC=C1C</chem>     |            | 40.0 [38]  |  |           |           |                  |
| <chem>COC1=CC(=CC=C1)C1=C(C#N)C(=O)NC(SCC(=O)NC2=CC=C(C=C2)S(N)(=O)=O)=N1</chem>                                             |            | 40.0 [56]  |  |           |           |                  |
| <chem>CC(C)C1=CC=C(NC(=O)CSC2=NC(=CC=N2)C2=CC=CS2)C=C1</chem>                                                                |            | 40.0 [56]  |  |           |           |                  |
| <chem>OC1=CC=C(Cl)C=C1C(=O)NC1=C(Cl)C=C(C=C1)N(=O)=O</chem>                                                                  |            | 40.0 [64]  |  |           |           |                  |

|                                                                                                                       |           |            |  |            |           |     |
|-----------------------------------------------------------------------------------------------------------------------|-----------|------------|--|------------|-----------|-----|
| <chem>C[C@@H](O)[C@H](NC(=O)[C@H](CO)NC(=O)[C@H](CC(N)=O)NC(C)=O)C(=O)N[C@@H](CO)C(=O)N[C@H](CO)CCC(N)=O</chem>       |           |            |  | 40.98 [53] | 3snc [53] |     |
| <chem>CC(=O)N[C@@H](CC(O)=O)C(=O)N[C@@H](CO)C(=O)N[C@@H](Cc1cccc1)C(=O)N[C@@H](CC(O)=O)C(=O)N[C@H](CO)CCC(N)=O</chem> |           |            |  | 41.24 [53] | 3snb [53] |     |
| <chem>CN(C)CCCNC(=O)\C(=C\c1oc(cc1)c2ccccc2[N+](=O)[O-])\NC(=O)c3ccc(C)cc3</chem>                                     |           | 41.39 [79] |  | 9.93 [79]  |           |     |
| <chem>CCCCN1C(=O)C(=O)C2=C1C=CC(I)=C2</chem>                                                                          | 41.8 [10] |            |  |            |           |     |
| <chem>OC(=O)C1=CC=C(\C=C2/C(=O)N(N=C2C2=CC=CC=C2)C2=CC=C(OC(F)(F)F)C=C2)C=C1</chem>                                   |           | 42.0 [60]  |  |            |           |     |
| <chem>OC(=O)C(NC(=O)C(\NC(=O)C1=CC=C(Br)C=C1)=C/C=C/C1=CC=CC=C1)NC1=CC=CC=C1</chem>                                   |           | 42.19 [62] |  |            |           |     |
| <chem>OCC1OC(OC2=C(OC3=C(C(O)=CC(O)=C3)C2=O)C2=CC=C(O)C(O)=C2)C(O)C(O)C1O</chem>                                      |           | 42.79 [77] |  |            |           |     |
| <chem>CC(C)(C)NC(=O)C(c1ccncc1)N(C(=O)c1cccc1)c1ccc(C(C)(C)C)cc1</chem>                                               |           | 45.0 [34]  |  |            |           |     |
| <chem>COC1=CC=C(NC(=O)CSC2=NC(=CC(O)=N2)C2=CC=CC=C2)C=C1OC</chem>                                                     |           | 45.0 [56]  |  |            |           |     |
| <chem>CC(C)C[C@H](NC(=O)[C@@H](NC(=O)OCc1cccc1)C(C)C)C(=O)N[C@@H](CCC(=O)c1nccs1)C(=O)c1nccs1</chem>                  |           |            |  | 45.2 [52]  |           |     |
| <chem>CCC(=C)C(=O)C1=C(Cl)C(Cl)=C(OCC(=O)NC(C)(C)C)C=C1</chem>                                                        |           |            |  | 45.8 [78]  |           |     |
| <chem>CCOC(=O)C1=CC(=O)OC2=C1C=C(O)C(O)=C2</chem>                                                                     |           | 46.0 [80]  |  |            |           | MC8 |
| <chem>CC(C)(C)NC(=O)C(c1ccncc1)N(C(=O)c1ncco1)c1ccc(C(C)(C)C)cc1</chem>                                               |           | 47.0 [34]  |  |            |           |     |
| <chem>CC(=O)N[C@@H](CO)C(=O)N[C@@H](C)C(=O)N[C@H](C(=O)N[C@@H](CC(C)C)C(=O)N[C@H](C=O)Cc1cccs1)C(C)C</chem>           |           | 48.0 [16]  |  |            |           |     |
| <chem>CC(C)C[C@H](NC(=O)[C@@H](NC(=O)[C@H](C)NC(=O)OC(C)(C)C)C(C)C)C(=O)N[C@@H](CCC(N)=O)C=N</chem>                   |           | 49.0 [59]  |  |            | 3vb4 [59] |     |
| <chem>CC(C)C[C@H](NC(=O)[C@@H](NC(=O)[C@H](C)NC(=O)c1cc(C)on1)C(C)C)C(=O)N[C@@H](CCC(N)=O)C=N</chem>                  |           | 49.0 [59]  |  |            | 3vb7 [59] |     |

|                                                                                                                                            |  |            |  |           |  |     |
|--------------------------------------------------------------------------------------------------------------------------------------------|--|------------|--|-----------|--|-----|
| <chem>CC(C)c1cc2c(cc1O)[C@@]1(C)CC<br/>CC(C)(C)[C@@H]1CC2</chem>                                                                           |  | 49.6 [65]  |  |           |  |     |
| <chem>CCN(CC)C(=O)CC[C@H](NC(=O)[C<br/>@H](CC(C)C)NC(=O)[C@@H](NC(=O)<br/>OCc1cccc1)C(C)C)C(=O)c1n<br/>c2cccc2s1</chem>                    |  |            |  | 49.3 [52] |  |     |
| <chem>CC(=O)CCC(=O)N1N=C(CC1C1=CC<br/>=C(Br)C=C1)C1=C(O)N=C2C=CC(C)<br/>=CC2=C1C1=CC=CC=C1</chem>                                          |  | 49.96 [62] |  |           |  |     |
| <chem>O=C1C(=O)N(Cc2ccccc2)c2ccc(I) cc21</chem>                                                                                            |  | 50.0 [21]  |  |           |  |     |
| <chem>CC(C)(C)NC(=O)C(c1cccn1)N(C<br/>(=O)c1cccs1)c1ccc(C(C)(C)C) cc1</chem>                                                               |  | 50.0 [34]  |  |           |  |     |
| <chem>O=C1Nc2ccc(S(=O)(=O)N3CCN(c4ccc<br/>cn4)CC3)cc2C1=O</chem>                                                                           |  | 51.33 [44] |  |           |  |     |
| <chem>COc1ccc(-c2cnc(C(=O)[C@H](C[C@@<br/>H]3CCNC3=O)NC(=O)[C@H](CC<br/>(C)C)NC(=O)OCc3ccccc3)s2)cc1</chem>                                |  |            |  | 52.0 [33] |  |     |
| <chem>CC(C)CC(NC(=O)C(NC(=O)C(NC(C)<br/>=O)C(C)C)C(C)O)C(=O)NC(CCC(=O)<br/>N(C)C)C(=O)CN1NC(=O)C2=C(C=C<br/>C=C2N(=O)=O)C1=O</chem>        |  | 53.0 [39]  |  |           |  |     |
| <chem>O[C@H]1CC2=C(OC1C1=C3C=C(C=C<br/>C(O)C(=O)C3=C(O)C(O)=C1)C1OC3=<br/>CC(O)=CC(O)=C3C[C@H]1O)C=C(O)<br/>C=C2O</chem>                   |  | 56.0 [57]  |  |           |  | TF1 |
| <chem>COC1=CC=C(OCC(=O)N[C@H](C(C)<br/>C)C(=O)N[C@H](CC(C)C)C(=O)N[C@<br/>H](C[C@H]2CCNC2=O)C(=O)c2ncc<br/>(s2)C2=CC=C(OC)C=C2)C=C1</chem> |  |            |  | 56.0 [2]  |  |     |
| <chem>CC1=CC(Br)=C(C=C1)N1C(=O)CC<br/>(SC2=CC=CC=C2C(O)=O)C1=O</chem>                                                                      |  | 56.24 [62] |  |           |  |     |
| <chem>O=C[C@H](Cc1c[nH]cn1)NC[C@@H]<br/>1C[C@H]2CCCC[C@@H]2CN1C<br/>(=O)c1ccc(F)cc1</chem>                                                 |  | 57.0 [81]  |  |           |  |     |
| <chem>FC(F)(C(=O)C1=CC=C(O1)C1=CC=C<br/>(Cl)C=C1)C1=CN=CC(Br)=C1</chem>                                                                    |  | 57 [70]    |  |           |  |     |
| <chem>Nc1nc(CSc2nnc(c3cccc4ccccc34)n2<br/>c5ccccc5)cs1</chem>                                                                              |  | 58.35 [79] |  |           |  |     |
| <chem>COC1=CC(=CC=C1)C1=C(C#N)C(=O<br/>)NC(SCC(=O)NC2=CC=C(C=C2)<br/>C(C)=O)=N1</chem>                                                     |  | 60.0 [56]  |  |           |  |     |
| <chem>CCC(SC1=NC(C2=CC=CC(OC)=C2)=<br/>C(C#N)C(=O)N1)C(=O)NC1=CC=<br/>CC(=C1)C(C)=O</chem>                                                 |  | 60.0 [56]  |  |           |  |     |
| <chem>OCC1OC(OC2=CC3=C(C(O)=C2)C<br/>(=O)C(OC2OC(CO)C(O)C(O)C2O)<br/>=C(O3)C2=CC=C(O)C(O)=C2)<br/>C(O)C(O)C1O</chem>                       |  | 61.46 [77] |  |           |  |     |

|                                                                                                                                 |  |            |  |            |           |           |
|---------------------------------------------------------------------------------------------------------------------------------|--|------------|--|------------|-----------|-----------|
| <chem>CC(=O)N[C@@H](CO)C(=O)N[C@@H](C)C(=O)N[C@H](C(=O)N[C@@H](CC(C)C)C(=O)N[C@H](C=O)CC1CCCC1)C(C)C</chem>                     |  | 62.0 [16]  |  |            |           |           |
| <chem>BrC1ccc(cc1)C(=O)N1C[C@H]2CCC[C@@H]2C[C@H]1CN[C@@H](Cc1cnc[nH]1)C=O</chem>                                                |  | 63.0 [81]  |  |            | 4tww [81] |           |
| <chem>COc1cc(ccc1O)C2N(CCN(C)C)C(=O)C(=C2C(=O)c3ccc(OCC(C)C)cc3)O</chem>                                                        |  | 62.79 [79] |  |            |           |           |
| <chem>CC(C)CC(NC(=O)C(NC(=O)C(NC(C)=O)C(C)C)C(C)OC1=CC=CC=C1)C(=O)NC(CCC(=O)N(C)C)C(=O)CN1NC(=O)C2=C(C=CC=C2)C1=O</chem>        |  | 64.0 [39]  |  |            |           |           |
| <chem>C[C@H](NC(=O)[C@H](CC1=CC=CC=C1)NC(=O)OCC1=CC=CC=C1)C(=O)CF</chem>                                                        |  |            |  | 64.0 [32]  |           |           |
| <chem>CCCCN1C(=O)C(=O)c2cc(I)ccc21</chem>                                                                                       |  | 66.0 [21]  |  |            |           |           |
| <chem>CN1CCN(S(=O)(=O)c2ccc3c(c2)C(=O)C(=O)N3Cc2cccc2)CC1</chem>                                                                |  | 67.2 [44]  |  |            |           |           |
| <chem>O=C[C@H](Cc1c[nH]cn1)NC[C@@H]1C[C@H]2CCCC[C@@H]2CN1C(=O)c1cccc1</chem>                                                    |  | 68.0 [81]  |  |            |           |           |
| <chem>CC(C)CC(NC(=O)C(NC(=O)C(NC(C)=O)C(C)C)C(C)OC1=CC=CC=C1)C(=O)NC(CCC(=O)N(C)C)C(=O)CN1NC(=O)C2=C(C=CC=C2N(=O)=O)C1=O</chem> |  | 70.0 [39]  |  |            |           |           |
| <chem>CCOC(=O)/C=C/[C@H](C[C@@H]1CCNC1=O)NC(=O)[C@H](CC=C(C)C)CC(=O)[C@@H](NC(=O)c2cc(C)on2)C(C)C</chem>                        |  | 70.0 [82]  |  |            | 2alv [82] |           |
| <chem>CN1C(=O)C(=O)c2cc(C(N)=O)c cc21</chem>                                                                                    |  | 71.0 [39]  |  |            |           |           |
| <chem>COc1ccc(-c2cc(=O)c3c(O)cc(O)cc3o2)cc1-c1c(O)cc(O)c2c(=O)cc(-c3ccc(O)cc3)oc12</chem>                                       |  | 72.3 [65]  |  |            |           |           |
| <chem>CC(=O)N[C@@H](CC(N)=O)C(=O)N[C@@H](CO)C(=O)N[C@@H](Cc1cccc1)C(=O)N[C@@H](CO)C(=O)N[C@H](CO)CCC(N)=O</chem>                |  |            |  | 72.73 [53] | 3sna [53] |           |
| <chem>Clc2cc(Cl)ccc2Oc1ccc(Cl)cc1O</chem>                                                                                       |  | 75.0 [63]  |  |            |           | Triclosan |
| <chem>C1C1=CC=C(C=C1)C1=NC=C(O1)C(=O)CC1=CN=CC(Br)=C1</chem>                                                                    |  | 75.0 [70]  |  |            |           |           |
| <chem>Cn1cnc(C(=O)N(c2ccc(C(C)(C)C)cc2)C(C(=O)NC(C)(C)C)c2ccnc2)c1</chem>                                                       |  | 75.0 [34]  |  |            |           |           |
| <chem>CN1CCN(S(=O)(=O)c2ccc3c(c2)C(=O)C(=O)N3)CC1</chem>                                                                        |  | 76.74 [44] |  |            |           |           |

|                                                                                                                                   |             |             |  |            |                                  |
|-----------------------------------------------------------------------------------------------------------------------------------|-------------|-------------|--|------------|----------------------------------|
| <chem>COc1cc(\C=N\NC(=O)\C=C/c2ccc<br/>cc2)\NC(=O)c3ccccc3)cc(OC)c1O</chem>                                                       | 77.09 [79]  |             |  |            |                                  |
| <chem>CCOC(=O)CC[C@H](C[C@H]1CCN<br/>C1=O)NC(=O)[C@H](CC=C(C)C)CC(<br/>=O)[C@@H](NC(=O)[C@H](CO)NC(<br/>=O)OC(C)(C)C)C(C)C</chem> | 80.0 [68]   |             |  | 2qiq [68]  |                                  |
| <chem>CCOC(=O)\C=C\C(CC1CCNC1=O)<br/>NC(=O)C(CC=C(C)C)CC(=O)C(NC(<br/>=O)C(CO)NC(=O)OC(C)(C)C)C(C)C</chem>                        | 80.0 [68]   |             |  |            | GRL-0155S                        |
| <chem>COC(=O)C1=C(C)N(CC2=CC=CN=<br/>C2)C(=O)\C1=C/C1=CC=C(OCC(=O)<br/>NCC2=CCCO2)C=C1</chem>                                     | 80.46 [62]  |             |  |            |                                  |
| <chem>CN1CCN(S(=O)(=O)c2ccc3c(c2)<br/>C(=O)C(=O)N3Cc2ccc3ccccc3c2) CC1</chem>                                                     | 82.91 [44]  |             |  |            |                                  |
| <chem>CC(C)C[C@@H](NC(=O)[C@H](NC<br/>(=O)OC1=CC=CC=C1)C(C)C)C(=O)<br/>N[C@H](C[C@H]1CCNC1=O)C(=O)c1<br/>nccs1</chem>             | 85 [2]      |             |  |            |                                  |
| <chem>Cc1coc2c1C(=O)C(=O)c1c-2ccc2<br/>c1CCCC2(C)C</chem>                                                                         | 89.1 [67]   |             |  |            |                                  |
| <chem>O=C(CSc1ncnc2c1sc3nc(N4CCOC<br/>C4)c5CCCCc5c23)NCc6occc6</chem>                                                             | 90.72 [79]  |             |  |            |                                  |
| <chem>CCCCN(C)C[C@H]1O[C@H](CN[C<br/>@@H](CC2=CNC=N2)C=O)CC2CCC<br/>CC12</chem>                                                   | 95.0 [83]   |             |  |            |                                  |
| <chem>OC1CC2=C(OC1C1=CC(O)=C(O)C<br/>(O)=C1)C=C(O)C=C2O</chem>                                                                    | 100.0 [57]  |             |  |            | Catechin                         |
| <chem>CN1C=NC2=C1C(=O)N(C(=O)N2C)C</chem>                                                                                         | 100.0 [57]  |             |  |            | Caffeine                         |
| <chem>OC1CC2=C(OC1C1=CC(O)=C(O)C=<br/>C1)C=C(O)C=C2O</chem>                                                                       | 100.0 [57]  |             |  |            | Epicatechin                      |
| <chem>OC1=CC2=C(CC(OC(=O)C3=CC(O)<br/>=C(O)C(O)=C3)C(O2)C2=CC(O)=C<br/>(O)C=C2)C(O)=C1</chem>                                     | 100.0 [57]  |             |  |            | Epicatechin<br>gallate           |
| <chem>OC1=CC2=C(CC(OC(=O)C3=CC(O)<br/>=C(O)C(O)=C3)C(O2)C2=CC(O)=C<br/>(O)C(O)=C2)C(O)=C1</chem>                                  | 100.0 [57]  |             |  |            | (-)-Epigallo-<br>catechin gallte |
| <chem>Cn1c2c(c(=O)n(c1=O)C)[nH]cn2</chem>                                                                                         | 100.0 [57]  |             |  |            | Theophylline                     |
| <chem>C1C(C(OC2=CC(=CC(=C21)O)O)C3<br/>=CC(=C(C(=C3)O)O)O)O</chem>                                                                | 100.0 [57]  |             |  |            | Epigallocatechin                 |
| <chem>CC1=CC(=O)NC(SCC(=O)NC2=CC(<br/>C1)=CC=C2OC2=CC=CC=C2)=N1</chem>                                                            | 100.0 [56]  |             |  |            |                                  |
| <chem>Cc1nc(C)c(s1)C(=O)C2=C(O)C(<br/>=O)N(CCCN3CCOCC3)C2c4cccc(c4)<br/>[N+](=O)[O-]</chem>                                       | 101.38 [79] |             |  |            |                                  |
| <chem>CC(C)COC(=O)N[C@@H](C(C)C)C(<br/>=O)CC1</chem>                                                                              |             |             |  | 105.0 [32] |                                  |
| <chem>[H][C@]56C[C@@H](C(=O)N[C@]1</chem>                                                                                         |             | 107.36 [84] |  |            | Dihydroer-                       |

|                                                                                                   |            |  |  |            |          |
|---------------------------------------------------------------------------------------------------|------------|--|--|------------|----------|
| (C)O[C@]4(O)N(C1=O)[C@@H](Cc2ccccc2)C(=O)N3CCC[C@]34[H])CN(C)[C@]5([H])Cc7c[nH]c8cccc6c78         |            |  |  |            | gotamine |
| O=C[C@H](Cc1cnc[nH]1)NC[C@@H]1C[C@H]2CCCC[C@@H]2CN1C(=O)c1ccc(cc1)-c1ccccc1                       | 108.0 [81] |  |  | 4twy [81]  |          |
| CCN(CC)C(=O)CC[C@H](NC(=O)[C@H](CC(C)C)NC(=O)[C@@H](NC(=O)OCc1ccccc1)C(C)C)C(=O)c1nccs1           |            |  |  | 112.0 [52] |          |
| CC(C)C[C@H](NC(=O)[C@@H](NC(=O)OCc1ccccc1)C(C)C)C(=O)N[C@@H](CCC(=O)O)C(=O)C(F)(F)F               |            |  |  | 116.0 [52] |          |
| CC(C)(C)OC(=O)N[C@@H](CC1=CC=CC=C1)[C@H](O)CC1                                                    |            |  |  | 128.0 [32] |          |
| CC(=O)Oc1cc2c(cc1C(C)C)CC[C@H]1[C@]2(C)CCC[C@@]1(C)CO                                             | 128.9 [65] |  |  |            |          |
| CC(C)C[C@H](NC(=O)[C@@H](NC(=O)[C@H](C)NC(=O)OCC1=CC=CC=C1)C(C)C)C(=O)N[C@@H](CCC(C)=O)C(C)=O     |            |  |  | 134.5 [32] |          |
| O=C[C@H](Cc1c[nH]cn1)NC[C@@H]1C[C@H]2CCCC[C@@H]2CN1C(=O)c1cccc(-c2ccccc2)c1                       | 135.0 [81] |  |  |            |          |
| O=C[C@H](Cc1c[nH]cn1)NC[C@@H]1C[C@H]2CCCC[C@@H]2CN1C(=O)c1ccccc1-c1ccccc1                         | 135.0 [81] |  |  |            |          |
| CC(C)C[C@H](NC(=O)[C@@H](NC(=O)[C@H](C)NC(=O)OCc1ccccc1)C(C)C)C(=O)N[C@@H](CCC(N)=O)C(=O)C(F)(F)F |            |  |  | 135.0 [52] |          |
| C=C1CC[C@H]2[C@](C)(CO)CCC[C@]2(C)[C@H]1CC/C(C)=C\CO                                              | 137.7 [65] |  |  |            |          |
| CCN(CC)C(=O)CC[C@H](NC(=O)[C@@H](NC(=O)OCc1ccccc1)C(C)C)C(=O)c1nc2ccccc2s1                        |            |  |  | 159.0 [52] |          |
| CC(C)c1cc2c(cc1O)[C@@]1(C)CC[C@@](C)(C=O)[C@@H]1CC2                                               | 163.2 [65] |  |  |            |          |
| [H][C@]12CCCC[C@]1([H])CN([C@@H](CN[C@@H](Cc1cnc[nH]1)C=O)C2)C(=O)c1ccc(Br)cc1                    | 175.0 [81] |  |  |            |          |
| CC(C)C1=CC2=CC[C@H]3[C@](C)(C(=O)O)CCC[C@]3(C)[C@H]2CC1                                           | 189.1 [65] |  |  |            |          |
| CCOC(=O)\C=C\C(CC1CCNC1=O)NC(=O)C(CC(C)C)NC(=O)C(NC(=O)C1=NOC(C)=C1)C(C)C                         | 200.0 [68] |  |  |            |          |
| CC1=CC(O)=NC(SCC(=O)NC2=CC=C(OC3=CC=C(Cl)C=C3)C=C2)=N1                                            | 200.0 [56] |  |  |            |          |



|                                                                                                      |            |            |          |           |              |
|------------------------------------------------------------------------------------------------------|------------|------------|----------|-----------|--------------|
| <chem>CC(C)C1=CC=C(NC(=O)CSC2=NC=CC(=N2)C2=CSC(COC3=CC=CC=C3C1)=N2)C=C1</chem>                       | 200.0 [56] |            |          |           |              |
| <chem>COC(OC)C1=NC(SCC(=O)NC2=CC=C(C=C2)C(F)(F)F)=NC(O)=C1</chem>                                    | 200.0 [56] |            |          |           |              |
| <chem>CCCCC1=CC(C)=C(NC(=O)CSC2=NC(C3CCCCC3)=C(C#N)C(=O)N2)C=C1</chem>                               | 200.0 [56] |            |          |           |              |
| <chem>FC(F)(F)C1=CC=CC(NC(=O)CSC2=NC(C3=CC=CC=C3)=C(C#N)C(=O)N2)=C1</chem>                           | 200.0 [56] |            |          |           |              |
| <chem>COC(=O)[C@]1(C)CCC[C@]2(C)c3ccc(C(C)C)cc3CC[C@H]21</chem>                                      | 207.0 []   |            |          |           |              |
| <chem>CC(C)C[C@@H](NC(=O)[C@H](NC(=O)COC1=CC=CC=C1)C(C)C)C(=O)N[C@H](CC1=CNC=N1)C(=O)c1nccs1</chem>  | 210.0 [2]  |            |          |           |              |
| <chem>CC(C)c1cc2c(cc1O)[C@@]1(C)CC[C@@](C)(CO)[C@@H]1CC2</chem>                                      | 220.8 [65] |            |          |           |              |
| <chem>C[C@H]1COC2=C1C(=O)C(=O)c1c2ccc2c1CCCC2(C)C</chem>                                             | 226.7 [67] |            | 9.0 [67] |           |              |
| <chem>CC(C)c1cc2c(cc1O)[C@@]1(C)CC[C@H](O)C(C)(C)[C@@H]1CC2</chem>                                   | 233.4 [65] |            |          |           |              |
| <chem>O=C[C@H](Cc1cnc[nH]1)NC[C@H]1C[C@@H]2CCCC[C@H]2CN1C(=O)c1ccc(cc1)-c1cccc1</chem>               | 240.0 [81] |            |          | 4wy3 [81] |              |
| <chem>CCOC(=O)C1=C(N)N=C(SCC(=O)NC2=CC=C(C=C2)N(=O)=O)N=C1</chem>                                    | 250.0 [56] |            |          |           |              |
| <chem>CC(C)COC(=O)N[C@H](C(C)C)C(=O)N[C@H](CC(C)C)C(=O)N[C@H](C[C@H]1CCNC1=O)C(=O)c1nccs1</chem>     | 250.0 [2]  |            |          |           |              |
| <chem>COc1c2c(cc(c1N3C[C@@H]4CCCN[C@@H]4C3)F)c(=O)c(cn2C5CC5)C(=O)O</chem>                           |            | 249.0 [84] |          |           | Moxifloxacin |
| <chem>CCCCN(C)C[C@H]1O[C@@H](CN[C@@H](CC2=CNC=N2)C=O)CC2CCC12</chem>                                 | 260.0 [83] |            |          |           |              |
| <chem>CC(C)C[C@@H](NC(=O)[C@H](NC(=O)OCC1=CC=CC=C1)C(C)C)C(=O)N[C@H](CC1=CNC=N1)C(=O)c1nccs1</chem>  | 260.0 [2]  |            |          |           |              |
| <chem>CC(C)C[C@@H](NC(=O)[C@H](NC(=O)OCC(C)(C)C)C(C)C)C(=O)N[C@H](C[C@H]1CCNC1=O)C(=O)c1nccs1</chem> | 280.0 [2]  |            |          |           |              |
| <chem>O=c1cc(-c2ccc(O)cc2)oc2cc(O)cc(O)c12</chem>                                                    | 280.8 [65] |            |          |           |              |

|                                                                                                                      |            |          |            |  |             |
|----------------------------------------------------------------------------------------------------------------------|------------|----------|------------|--|-------------|
| <chem>C=C[C@@]1(C)CC[C@H]2C(=CC[C@H]3[C@](C)(C(=O)O)CCC[C@]23C)C1</chem>                                             | 283.5 [65] |          |            |  |             |
| <chem>CC(C)CC(NC(=O)C(NC(=O)C(CCC(=O)OCC1=CC=CC=C1)NC(=O)OC(C)(C)C(C)C)C(N)=O</chem>                                 |            |          | 286.0 [32] |  |             |
| <chem>CCCN(CCC)C(=O)CC[C@H](NC(=O)[C@H](CC(C)C)NC(=O)[C@@H](NC(=O)[C@H](C)NC(=O)OCc1cccc1)C(C)C)C(=O)C(F)(F)F</chem> |            |          | 297.0 [52] |  |             |
| <chem>CCOC(=O)\C=C\C(CC1CCNC1=O)NC(=O)C(CC1=CC=CC=C1)NC(=O)C(NC(=O)C1=NOC(C)=C1)C(C)C</chem>                         | 300.0 [68] |          |            |  |             |
| <chem>CCOC1=CC=C(C=C1)N1C(=O)CC(S C2=NC(C)=CC(C)=N2)C1=O</chem>                                                      | 300.0 [56] |          |            |  |             |
| <chem>COC1=CC=CC(=C1)C1=C(C#N)C(=O)NC(SCC(=O)NC2=CC=C(C=C2)N(=O)=O)=N1</chem>                                        | 300.0 [56] |          |            |  |             |
| <chem>CC(SC1=NC(C2=CC=CC=C2)=C(C#N)C(=O)N1)C(=O)NC1=CC=C(Cl)C=C1</chem>                                              | 300.0 [56] |          |            |  |             |
| <chem>c1c(cc(c(c1F)CNC(=O)c2cn3c(c(c2=O)O)C(=O)N4[C@H]5CC[C@H](C5)O[C@@H]4C3)F)F</chem>                              |            | 302 [84] |            |  | Bictegravir |
| <chem>CC(C)(C)C1=CC=C(NC(=O)CSC2=NC(C3CCCCC3)=C(C#N)C(=O)N2)C=C1</chem>                                              | 350.0 [56] |          |            |  |             |
| <chem>CCCN(CCC)C(=O)CC[C@H](NC(=O)[C@H](CC(C)C)NC(=O)[C@@H](NC(=O)OCc1cccc1)C(C)C)C(=O)C(F)(F)F</chem>               |            |          | 363.0 [52] |  |             |
| <chem>CC1=CC=C(C=C1)C(NC(=O)OCC1=C C=CC=C1)NC(=O)OCC1=CC=CC=C1</chem>                                                |            |          | 366.0 [32] |  |             |
| <chem>CC(C)[C@H](NC(=O)[C@H](CC1=CC=C(O)C=C1)NC(C)=O)C(=O)N[C@@H](C)C(=O)N[C@@H](CC(O)=O)C(=O)CC1</chem>             |            |          | 389.0 [32] |  |             |
| <chem>COC1=CC=C(C=C1)C1=CC=NC(SCC(=O)NC2=CC=C(C=C2)C(C)C)=N1</chem>                                                  | 400.0 [56] |          |            |  |             |
| <chem>CCCCN(C)C[C@@H]1O[C@@H](CN[C@@H](CC2=CNC=N2)C=O)CC2CC CCCC12</chem>                                            | 440.0 [83] |          |            |  |             |
| <chem>CCN(CC)C(=O)CC[C@H](NC(=O)[C@H](CC(C)C)NC(=O)OCc1cccc1)C(=O)c1nccs1</chem>                                     |            |          | 462.0 [52] |  |             |

|                                                                                                              |           |            |           |             |  |              |
|--------------------------------------------------------------------------------------------------------------|-----------|------------|-----------|-------------|--|--------------|
| <chem>CC(C)C[C@H](NC(=O)[C@@H](NC(=O)OCc1ccccc1)C(C)C(=O)N[C@@H](CCC(=O)N1CCOCC1)C(=O)c1nccs1</chem>         |           |            |           | 478.0 [52]  |  |              |
| <chem>CC1=NC(SCC(=O)NC2=CC=C(Cl)C=C2F)=NC(=C1)C(F)(F)F</chem>                                                |           | 500.0 [56] |           |             |  |              |
| <chem>O=S(=O)(c1ccc(N)cc1)N(CC(C)C)C[C@H](O)[C@@H](NC(=O)O[C@@H]2CO[C@H]3OCC[C@@H]23)Cc4cccc4</chem>         |           |            |           | 518.0 [84]  |  | Darunavir    |
| <chem>CCCN(CCC)C(=O)CC[C@H](NC(=O)[C@H](CC(C)C)NC(=O)OCc1ccccc1)C(=O)C(F)(F)F</chem>                         |           |            |           | 584.0 [52]  |  |              |
| <chem>CCN(CC)C(=O)CC[C@H](NC(=O)[C@@H](NC(=O)OCc1ccccc1)C(C)C(=O)c1nccs1</chem>                              |           |            |           | 614.00 [52] |  |              |
| <chem>CCCCN(C)C[C@@H]1O[C@@H](CN[C@@H](CC2=CNC=N2)C=O)CC2CCC12</chem>                                        |           | 780.0 [83] |           |             |  |              |
| <chem>CCOC(=O)\C=C\C[C@@H](C[C@@H]1CCNC1=O)NC(=O)C(CC=C(C)C)C(=O)[C@H](NC(=O)C1=NOC(C)=C1)C(C)C</chem>       |           | 800.0 [68] |           |             |  |              |
| <chem>C[C@H](NC(=O)[C@H](CC1=CC=CC=C1)NC(=O)OCC1=CC=CC=C1)C(=O)N[C@@H](CCC(N)=O)C(=O)C(F)(F)F</chem>         |           |            |           | 844.0 [32]  |  |              |
| <chem>C[C@H](NC(=O)[C@H](CC1=CC=CC=C1)NC(=O)OCc1ccccc1)C(=O)N[C@@H](CCC(N)=O)C(=O)C(F)(F)F</chem>            |           |            |           | 844.4 [85]  |  |              |
| <chem>CCOC(=O)\C=C\C(CC1CCNC1=O)NC(=O)C(CC(=O)C(NC(=O)C1=NO)C(C)=C1)C(C)C)CC1=CC=CC=C1</chem>                |           | 870.0 [68] |           |             |  |              |
| <chem>CC(=O)N[C@@H](CO)C(=O)N[C@@H](C)C(=O)N[C@H](C(=O)N[C@@H](CC(C)C)C(=O)N[C@H](C=O)Cc1ccccc1)C(C)C</chem> |           | 2000 [16]  |           |             |  |              |
| <chem>CC1C(C(C(O)OC2C(C(C(C2O)O)N=C(N)N)O)N=C(N)N)OC3C(C(C(C(O3)CO)O)O)NC)(C=O)O</chem>                      |           |            | 2134 [84] |             |  | Streptomycin |
| <chem>Clc1cc2nccc(c2cc1)NC(C)CCCN(C)CCO</chem>                                                               | 3584 [46] |            |           |             |  |              |

## References

- [1] Robert L Hoffman, Robert S Kania, Mary A Brothers, Jay F Davies, Rose A Ferre, Ketan S Gajiwala, Mingying He, Robert J Hogan, Kirk Kozminski, Lilian Y Li, et al. Discovery of ketone-based covalent inhibitors of coronavirus 3cl proteases for the potential therapeutic treatment of covid-19. *Journal of medicinal chemistry*, 63(21):12725–12747, 2020.
- [2] Sho Konno, Pillaiyar Thanigaimalai, Takehito Yamamoto, Kiyohiko Nakada, Rie Kakiuchi, Kentaro Takayama, Yuri Yamazaki, Fumika Yakushiji, Kenichi Akaji, Yoshiaki Kiso, et al. Design and synthesis of new tripeptide-type sars-cov 3cl protease inhibitors containing an electrophilic arylketone moiety. *Bioorganic & medicinal chemistry*, 21(2):412–424, 2013.
- [3] Pillaiyar Thanigaimalai, Sho Konno, Takehito Yamamoto, Yuji Koiwai, Akihiro Taguchi, Kentaro Takayama, Fumika Yakushiji, Kenichi Akaji, Shen-En Chen, Aurash Naser-Tavakolian, et al. Development of potent dipeptide-type sars-cov 3cl protease inhibitors with novel p3 scaffolds: design, synthesis, biological evaluation, and docking studies. *European journal of medicinal chemistry*, 68:372–384, 2013.
- [4] Chung-Yi Wu, Ke-Yung King, Chih-Jung Kuo, Jim-Min Fang, Ying-Ta Wu, Ming-Yi Ho, Chung-Lin Liao, Jiun-Jie Shie, Po-Huang Liang, and Chi-Huey Wong. Stable benzotriazole esters as mechanism-based inactivators of the severe acute respiratory syndrome 3cl protease. *Chemistry & biology*, 13(3):261–268, 2006.
- [5] Jiun-Jie Shie, Jim-Min Fang, Chih-Jung Kuo, Tun-Hsun Kuo, Po-Huang Liang, Hung-Jyun Huang, Wen-Bin Yang, Chun-Hung Lin, Jiun-Ling Chen, Yin-Ta Wu, et al. Discovery of potent anilide inhibitors against the severe acute respiratory syndrome 3cl protease. *Journal of medicinal chemistry*, 48(13):4469–4473, 2005.
- [6] Arun K Ghosh, Gangli Gong, Valerie Grum-Tokars, Debbie C Mulhearn, Susan C Baker, Melissa Coughlin, Bellur S Prabhakar, Katrina Sleeman, Michael E Johnson, and Andrew D Mesecar. Design, synthesis and antiviral efficacy of a series of potent chloropyridyl ester-derived sars-cov 3clpro inhibitors. *Bioorganic & medicinal chemistry letters*, 18(20):5684–5688, 2008.
- [7] Cheng-Chung Lee, Chih-Jung Kuo, Tzu-Ping Ko, Min-Feng Hsu, Yao-Chen Tsui, Shih-Cheng Chang, Syaulan Yang, Shu-Jen Chen, Hua-Chien Chen, Ming-Chu Hsu, et al. Structural basis of inhibition specificities of 3c and 3c-like proteases by zinc-coordinating and peptidomimetic compounds. *Journal of Biological Chemistry*, 284(12):7646–7655, 2009.
- [8] Wenhao Dai, Bing Zhang, Xia-Ming Jiang, Haixia Su, Jian Li, Yao Zhao, Xiong Xie, Zhenming Jin, Jingjing Peng, Fengjiang Liu, et al. Structure-based design of antiviral drug candidates targeting the sars-cov-2 main protease. *Science*, 368(6497):1331–1335, 2020.
- [9] Usman Bacha, Jennifer Barrila, Adrian Velazquez-Campoy, Stephanie A Leavitt, and Ernesto Freire. Identification of novel inhibitors of the sars coronavirus main protease 3clpro. *Biochemistry*, 43(17):4906–4912, 2004.
- [10] Pei Liu, Hongbo Liu, Qi Sun, Hao Liang, Chunmei Li, Xiaobing Deng, Ying Liu, and Luhua Lai. Potent inhibitors of sars-cov-2 3c-like protease derived from n-substituted isatin compounds. *European journal of medicinal chemistry*, 206:112702, 2020.
- [11] Cheng-Chung Lee, Chih-Jung Kuo, Min-Feng Hsu, Po-Huang Liang, Jim-Min Fang, Jiun-Jie Shie, and Andrew H-J Wang. Structural basis of mercury-and zinc-conjugated complexes as sars-cov 3c-like protease inhibitors. *FEBS letters*, 581(28):5454–5458, 2007.

- [12] Jianmin Zhang, Hanna I Pettersson, Carly Huitema, Chunying Niu, Jiang Yin, Michael NG James, Lindsay D Eltis, and John C Vederas. Design, synthesis, and evaluation of inhibitors for severe acute respiratory syndrome 3c-like protease based on phthalhydrazide ketones or heteroaromatic esters. *Journal of medicinal chemistry*, 50(8):1850–1864, 2007.
- [13] Mark Turlington, Aspen Chun, Sakshi Tomar, Aimee Egglar, Valerie Grum-Tokars, Jon Jacobs, J Scott Daniels, Eric Dawson, Adrian Saldanha, Peter Chase, et al. Discovery of n-(benzo [1, 2, 3] triazol-1-yl)-n-(benzyl) acetamido) phenyl) carboxamides as severe acute respiratory syndrome coronavirus (sars-cov) 3clpro inhibitors: identification of ml300 and noncovalent nanomolar inhibitors with an induced-fit binding. *Bioorganic & medicinal chemistry letters*, 23(22):6172–6177, 2013.
- [14] Syaulan Yang, Shu-Jen Chen, Min-Feng Hsu, Jen-Dar Wu, Chien-Te K Tseng, Yu-Fan Liu, Hua-Chien Chen, Chun-Wei Kuo, Chi-Shen Wu, Li-Wen Chang, et al. Synthesis, crystal structure, structure-activity relationships, and antiviral activity of a potent sars coronavirus 3cl protease inhibitor. *Journal of medicinal chemistry*, 49(16):4971–4980, 2006.
- [15] Chunying Niu, Jiang Yin, Jianmin Zhang, John C Vederas, and Michael NG James. Molecular docking identifies the binding of 3-chloropyridine moieties specifically to the s1 pocket of sars-cov mpro. *Bioorganic & medicinal chemistry*, 16(1):293–302, 2008.
- [16] Kenichi Akaji, Hiroyuki Konno, Hironori Mitsui, Kenta Teruya, Yasuhiro Shimamoto, Yasunao Hattori, Takeshi Ozaki, Masami Kusunoki, and Akira Sanjoh. Structure-based design, synthesis, and evaluation of peptide-mimetic sars 3cl protease inhibitors. *Journal of medicinal chemistry*, 54(23):7962–7973, 2011.
- [17] Yi-Ming Shao, Wen-Bin Yang, Hung-Pin Peng, Min-Feng Hsu, Keng-Chang Tsai, Tun-Hsun Kuo, Andrew H-J Wang, Po-Huang Liang, Chun-Hung Lin, An-Suei Yang, et al. Structure-based design and synthesis of highly potent sars-cov 3cl protease inhibitors. *ChemBioChem*, 8(14):1654–1657, 2007.
- [18] Sho Iketani, Farhad Forouhar, Hengrui Liu, Seo Jung Hong, Fang-Yu Lin, Manoj S Nair, Arie Zask, Yaoxing Huang, Li Xing, Brent R Stockwell, et al. Lead compounds for the development of sars-cov-2 3cl protease inhibitors. *bioRxiv*, 2020.
- [19] Jan E Blanchard, Nadine H Elowe, Carly Huitema, Pascal D Fortin, Jonathan D Cechetto, Lindsay D Eltis, and Eric D Brown. High-throughput screening identifies inhibitors of the sars coronavirus main proteinase. *Chemistry & biology*, 11(10):1445–1453, 2004.
- [20] Camila Coelho, Gloria Gallo, Claudia B Campos, Leon Hardy, and Martin Würtele. Biochemical screening for sars-cov-2 main protease inhibitors. *PloS one*, 15(10):e0240079, 2020.
- [21] Lu Zhou, Ying Liu, Weilin Zhang, Ping Wei, Changkang Huang, Jianfeng Pei, Yaxia Yuan, and Luhua Lai. Isatin compounds as noncovalent sars coronavirus 3c-like protease inhibitors. *Journal of medicinal chemistry*, 49(12):3440–3443, 2006.
- [22] Athri D Rathnayake, Jian Zheng, Yunjeong Kim, Krishani Dinali Perera, Samantha Mackin, David K Meyerholz, Maithri M Kashipathy, Kevin P Battaile, Scott Lovell, Stanley Perlman, et al. 3c-like protease inhibitors block coronavirus replication in vitro and improve survival in mers-cov–infected mice. *Science translational medicine*, 12(557), 2020.
- [23] Wayne Vuong, Muhammad Bashir Khan, Conrad Fischer, Elena Arutyunova, Tess Lamer, Justin Shields, Holly A Saffran, Ryan T McKay, Marco J van Belkum, Michael A Joyce, et al. Feline coronavirus drug inhibits the main protease of sars-cov-2 and blocks virus replication. *Nature communications*, 11(1):1–8, 2020.

- [24] Chunlong Ma, Michael D Sacco, Brett Hurst, Julia A Townsend, Yanmei Hu, Tommy Szeto, Xiujun Zhang, Bart Tarbet, Michael T Marty, Yu Chen, et al. Boceprevir, gc-376, and calpain inhibitors ii, xii inhibit sars-cov-2 viral replication by targeting the viral main protease. *bioRxiv*, 2020.
- [25] John T-A Hsu, Chih-Jung Kuo, Hsing-Pang Hsieh, Yeau-Ching Wang, Kuo-Kuei Huang, Coney P-C Lin, Ping-Fang Huang, Xin Chen, and Po-Huang Liang. Evaluation of metal-conjugated compounds as inhibitors of 3cl protease of sars-cov. *FEBS letters*, 574(1-3):116–120, 2004.
- [26] Linlin Zhang, Daizong Lin, Xinyuanyuan Sun, Ute Curth, Christian Drosten, Lucie Sauerhering, Stephan Becker, Katharina Rox, and Rolf Hilgenfeld. Crystal structure of sars-cov-2 main protease provides a basis for design of improved  $\alpha$ -ketoamide inhibitors. *Science*, 368(6489):409–412, 2020.
- [27] Hao Wang, Shuai He, Weilong Deng, Ying Zhang, Guobang Li, Jixue Sun, Wei Zhao, Yu Guo, Zheng Yin, Dongmei Li, et al. Comprehensive insights into the catalytic mechanism of middle east respiratory syndrome 3c-like protease and severe acute respiratory syndrome 3c-like protease. *ACS catalysis*, 10(10):5871–5890, 2020.
- [28] Vathan Kumar, Jin Soo Shin, Jiun-Jie Shie, Keun Bon Ku, Chonsaeng Kim, Yun Young Go, Kai-Fa Huang, Meehyein Kim, and Po-Huang Liang. Identification and evaluation of potent middle east respiratory syndrome coronavirus (mers-cov) 3clpro inhibitors. *Antiviral research*, 141:101–106, 2017.
- [29] Linlin Zhang, Daizong Lin, Yuri Kusov, Yong Nian, Qingjun Ma, Jiang Wang, Albrecht Von Brunn, Pieter Leyssen, Kristina Lanko, Johan Neyts, et al.  $\alpha$ -ketoamides as broad-spectrum inhibitors of coronavirus and enterovirus replication: structure-based design, synthesis, and activity assessment. *Journal of medicinal chemistry*, 63(9):4562–4578, 2020.
- [30] Wei Zhu, Miao Xu, Catherine Z Chen, Hui Guo, Min Shen, Xin Hu, Paul Shinn, Carleen Klumpp-Thomas, Samuel G Michael, and Wei Zheng. Identification of sars-cov-2 3cl protease inhibitors by a quantitative high-throughput screening. *ACS pharmacology & translational science*, 3(5):1008–1016, 2020.
- [31] I-Lin Lu, Neeraj Mahindroo, Po-Huang Liang, Yi-Hui Peng, Chih-Jung Kuo, Keng-Chang Tsai, Hsing-Pang Hsieh, Yu-Sheng Chao, and Su-Ying Wu. Structure-based drug design and structural biology study of novel nonpeptide inhibitors of severe acute respiratory syndrome coronavirus main protease. *Journal of medicinal chemistry*, 49(17):5154–5161, 2006.
- [32] Usman Bacha, Jennifer Barrila, Sandra B Gabelli, Yoshiaki Kiso, L Mario Amzel, and Ernesto Freire. Development of broad-spectrum halomethyl ketone inhibitors against coronavirus main protease 3cl-pro. *Chemical biology & drug design*, 72(1):34–49, 2008.
- [33] Pillaiyar Thanigaimalai, Sho Konno, Takehito Yamamoto, Yuji Koiwai, Akihiro Taguchi, Kentaro Takayama, Fumika Yakushiji, Kenichi Akaji, Yoshiaki Kiso, Yuko Kawasaki, et al. Design, synthesis, and biological evaluation of novel dipeptide-type sars-cov 3cl protease inhibitors: Structure–activity relationship study. *European journal of medicinal chemistry*, 65:436–447, 2013.
- [34] Jon Jacobs, Valerie Grum-Tokars, Ya Zhou, Mark Turlington, S Adrian Saldanha, Peter Chase, Aimee Egler, Eric S Dawson, Yahira M Baez-Santos, Sakshi Tomar, et al. Discovery, synthesis, and structure-based optimization of a series of n-(tert-butyl)-2-(n-arylamido)-2-(pyridin-3-yl) acetamides (ml188) as potent noncovalent small molecule inhibitors of the severe acute respiratory syndrome coronavirus (sars-cov) 3cl protease. *Journal of medicinal chemistry*, 56(2):534–546, 2013.
- [35] Zhesheng He, Wencong Zhao, Wenchao Niu, Xuejiao Gao, Xingfa Gao, Yong Gong, and Xueyun Gao. Molecules inhibit the enzyme activity of 3-chymotrypsin-like cysteine protease of sars-cov-2 virus: the experimental and theory studies. *bioRxiv*, 2020.
- [36] Li Wang, Bo-Bo Bao, Guo-Qing Song, Cheng Chen, Xu-Meng Zhang, Wei Lu, Zefang Wang, Yan Cai, Shuang Li, Sheng Fu, et al. Discovery of unsymmetrical aromatic disulfides as novel inhibitors of sars-

- cov main protease: chemical synthesis, biological evaluation, molecular docking and 3d-qsar study. *European journal of medicinal chemistry*, 137:450–461, 2017.
- [37] Jiun-Jie Shie, Jim-Min Fang, Tun-Hsun Kuo, Chih-Jung Kuo, Po-Huang Liang, Hung-Jyun Huang, Yin-Ta Wu, Jia-Tsong Jan, Yih-Shyun E Cheng, and Chi-Huey Wong. Inhibition of the severe acute respiratory syndrome 3cl protease by peptidomimetic  $\alpha$ ,  $\beta$ -unsaturated esters. *Bioorganic & medicinal chemistry*, 13(17):5240–5252, 2005.
- [38] Chung-Yi Wu, Jia-Tsong Jan, Shiou-Hwa Ma, Chih-Jung Kuo, Hsueh-Fen Juan, Yih-Shyun E Cheng, Hsien-Hua Hsu, Hsuan-Cheng Huang, Douglass Wu, Ashraf Brik, et al. Small molecules targeting severe acute respiratory syndrome human coronavirus. *Proceedings of the National Academy of Sciences*, 101(27):10012–10017, 2004.
- [39] Rajendra P Jain, Hanna I Pettersson, Jianmin Zhang, Katherine D Aull, Pascal D Fortin, Carly Huitema, Lindsay D Eltis, Jonathan C Parrish, Michael NG James, David S Wishart, et al. Synthesis and evaluation of keto-glutamine analogues as potent inhibitors of severe acute respiratory syndrome 3clpro. *Journal of medicinal chemistry*, 47(25):6113–6116, 2004.
- [40] Chunlong Ma, Yanmei Hu, Julia Alma Townsend, Panagiotis I Lagarias, Michael Thomas Marty, Antonios Kolocouris, and Jun Wang. Ebselen, disulfiram, carmofur, px-12, tideglusib, and shikonin are nonspecific promiscuous sars-cov-2 main protease inhibitors. *ACS pharmacology & translational science*, 3(6):1265–1277, 2020.
- [41] Young Bae Ryu, Su-Jin Park, Young Min Kim, Ju-Yeon Lee, Woo Duck Seo, Jong Sun Chang, Ki Hun Park, Mun-Chual Rho, and Woo Song Lee. Sars-cov 3clpro inhibitory effects of quinone-methide triterpenes from *tripterygium regelii*. *Bioorganic & medicinal chemistry letters*, 20(6):1873–1876, 2010.
- [42] Hai-xia Su, Sheng Yao, Wen-feng Zhao, Min-jun Li, Jia Liu, Wei-juan Shang, Hang Xie, Chang-qiang Ke, Hang-chen Hu, Mei-na Gao, et al. Anti-sars-cov-2 activities in vitro of shuanghuanglian preparations and bioactive ingredients. *Acta Pharmacologica Sinica*, 41(9):1167–1177, 2020.
- [43] Li-Rung Chen, Yu-Chin Wang, Yi Wen Lin, Shan-Yen Chou, Shyh-Fong Chen, Lee Tai Liu, Ying-Ta Wu, Chih-Jung Kuo, Tom Shieh-Shung Chen, and Shin-Hun Juang. Synthesis and evaluation of isatin derivatives as effective sars coronavirus 3cl protease inhibitors. *Bioorganic & Medicinal Chemistry Letters*, 15(12):3058–3062, 2005.
- [44] Wei Liu, He-Min Zhu, Guo-Jun Niu, En-Zhi Shi, Jie Chen, Bo Sun, Wei-Qiang Chen, Hong-Gang Zhou, and Cheng Yang. Synthesis, modification and docking studies of 5-sulfonyl isatin derivatives as sars-cov 3c-like protease inhibitors. *Bioorganic & medicinal chemistry*, 22(1):292–302, 2014.
- [45] Koen HG Verschuere, Ksenia Pumpor, Stefan Anemüller, Shuai Chen, Jeroen R Mesters, and Rolf Hilgenfeld. A structural view of the inactivation of the sars coronavirus main proteinase by benzotriazole esters. *Chemistry & biology*, 15(6):597–606, 2008.
- [46] Praveen Kumar Tripathi, Saurabh Upadhyay, Manju Singh, Siva Raghavendhar, Mohit Bhardwaj, Pradeep Sharma, and Ashok Kumar Patel. Screening and evaluation of approved drugs as inhibitors of main protease of sars-cov-2. *International journal of biological macromolecules*, 164:2622–2631, 2020.
- [47] Sven Ullrich and Christoph Nitsche. The sars-cov-2 main protease as drug target. *Bioorganic & Medicinal Chemistry Letters*, page 127377, 2020.
- [48] Xiaoyu Xue, Haitao Yang, Wei Shen, Qi Zhao, Jun Li, Kailin Yang, Cheng Chen, Yinghua Jin, Mark Bartlam, and Zihe Rao. Production of authentic sars-cov mpro with enhanced activity: application as a novel tag-cleavage endopeptidase for protein overproduction. *Journal of molecular biology*, 366(3):965–975, 2007.

- [49] Tae-Young Ahn, Chih-Jung Kuo, Hun-Ge Liu, Deok-Chan Ha, Po-Huang Liang, and Young-Sik Jung. Synthesis and evaluation of benzoquinolinone derivatives as sars-cov 3cl protease inhibitors. *Bulletin of the Korean Chemical Society*, 31(1):87–91, 2010.
- [50] Zhenming Jin, Xiaoyu Du, Yechun Xu, Yongqiang Deng, Meiqin Liu, Yao Zhao, Bing Zhang, Xiaofeng Li, Leike Zhang, Chao Peng, et al. Structure of m pro from sars-cov-2 and discovery of its inhibitors. *Nature*, 582(7811):289–293, 2020.
- [51] DH Goetz, Y Choe, E Hansell, YT Chen, M McDowell, CB Jonsson, WR Roush, J McKerrow, and CS Craik. Substrate specificity profiling and identification of a new class of inhibitor for the major protease of the sars coronavirus. *Biochemistry*, 46(30):8744–8752, 2007.
- [52] Thomas Regnier, Diganta Sarma, Koushi Hidaka, Usman Bacha, Ernesto Freire, Yoshio Hayashi, and Yoshiaki Kiso. New developments for the design, synthesis and biological evaluation of potent sars-cov 3clpro inhibitors. *Bioorganic & medicinal chemistry letters*, 19(10):2722–2727, 2009.
- [53] Lili Zhu, Shyla George, Marco F Schmidt, Samer I Al-Gharabli, Jörg Rademann, and Rolf Hilgenfeld. Peptide aldehyde inhibitors challenge the substrate specificity of the sars-coronavirus main protease. *Antiviral research*, 92(2):204–212, 2011.
- [54] Richard Y Kao, Wayne HW Tsui, Terri SW Lee, Julian A Tanner, Rory M Watt, Jian-Dong Huang, Lihong Hu, Guanhua Chen, Zhiwei Chen, Linqi Zhang, et al. Identification of novel small-molecule inhibitors of severe acute respiratory syndrome-associated coronavirus by chemical genetics. *Chemistry & biology*, 11(9):1293–1299, 2004.
- [55] Chih-Jung Kuo, Hun-Ge Liu, Yueh-Kuei Lo, Churl-Min Seong, Kee-In Lee, Young-Sik Jung, and Po-Huang Liang. Individual and common inhibitors of coronavirus and picornavirus main proteases. *FEBS letters*, 583(3):549–555, 2009.
- [56] Keng-Chang Tsai, Shih-Yuan Chen, Po-Huang Liang, I-Lin Lu, Neeraj Mahindroo, Hsing-Pang Hsieh, Yu-Sheng Chao, Lincoln Liu, Donald Liu, Wei Lien, et al. Discovery of a novel family of sars-cov protease inhibitors by virtual screening and 3d-qsar studies. *Journal of medicinal chemistry*, 49(12):3485–3495, 2006.
- [57] Chia-Nan Chen, Coney PC Lin, Kuo-Kuei Huang, Wei-Cheng Chen, Hsin-Pang Hsieh, Po-Huang Liang, and John T-A Hsu. Inhibition of sars-cov 3c-like protease activity by theaflavin-3, 3'-digallate (tf3). *Evidence-Based Complementary and Alternative Medicine*, 2(2):209–215, 2005.
- [58] Lifeng Fu, Fei Ye, Yong Feng, Feng Yu, Qisheng Wang, Yan Wu, Cheng Zhao, Huan Sun, Baoying Huang, Peihua Niu, et al. Both boceprevir and gc376 efficaciously inhibit sars-cov-2 by targeting its main protease. *Nature communications*, 11(1):1–8, 2020.
- [59] Chi-Pang Chuck, Chao Chen, Zhihai Ke, David Chi-Cheong Wan, Hak-Fun Chow, and Kam-Bo Wong. Design, synthesis and crystallographic analysis of nitrile-based broad-spectrum peptidomimetic inhibitors for coronavirus 3c-like proteases. *European journal of medicinal chemistry*, 59:1–6, 2013.
- [60] R Ramajayam, Kian-Pin Tan, Hun-Ge Liu, and Po-Huang Liang. Synthesis and evaluation of pyrazolone compounds as sars-coronavirus 3c-like protease inhibitors. *Bioorganic & medicinal chemistry*, 18(22):7849–7854, 2010.
- [61] Haitao Yang, Weiqing Xie, Xiaoyu Xue, Kailin Yang, Jing Ma, Wenxue Liang, Qi Zhao, Zhe Zhou, Duanqing Pei, John Ziebuhr, et al. Design of wide-spectrum inhibitors targeting coronavirus main proteases. *PLoS Biol*, 3(10):e324, 2005.
- [62] Lili Chen, Shuai Chen, Chunshan Gui, Jianhua Shen, Xu Shen, and Hualiang Jiang. Discovering severe acute respiratory syndrome coronavirus 3cl protease inhibitors: virtual screening, surface plas-



- mon resonance, and fluorescence resonance energy transfer assays. *Journal of biomolecular screening*, 11(8):915–921, 2006.
- [63] Yu-Chih Liu, Vicky Huang, Ti-Chun Chao, Chwan-Deng Hsiao, Atsui Lin, Ming-Fu Chang, and Lu-Ping Chow. Screening of drugs by fret analysis identifies inhibitors of sars-cov 3cl protease. *Biochemical and biophysical research communications*, 333(1):194–199, 2005.
- [64] Chih-Chun Wen, Yueh-Hsiung Kuo, Jia-Tsrong Jan, Po-Huang Liang, Sheng-Yang Wang, Hong-Gi Liu, Ching-Kuo Lee, Shang-Tzen Chang, Chih-Jung Kuo, Shoei-Sheng Lee, et al. Specific plant terpenoids and lignoids possess potent antiviral activities against severe acute respiratory syndrome coronavirus. *Journal of medicinal chemistry*, 50(17):4087–4095, 2007.
- [65] Young Bae Ryu, Hyung Jae Jeong, Jang Hoon Kim, Young Min Kim, Ji-Young Park, Doman Kim, Thi Thanh Hanh Nguyen, Su-Jin Park, Jong Sun Chang, Ki Hun Park, et al. Biflavonoids from *torreya nucifera* displaying sars-cov 3clpro inhibition. *Bioorganic & medicinal chemistry*, 18(22):7940–7947, 2010.
- [66] Jeremy D Baker, Rikki L Uhrich, Gerald C Kraemer, Jason E Love, and Brian C Kraemer. A drug repurposing screen identifies hepatitis c antivirals as inhibitors of the sars-cov2 main protease. *Plos one*, 16(2):e0245962, 2021.
- [67] Ji-Young Park, Jang Hoon Kim, Young Min Kim, Hyung Jae Jeong, Dae Wook Kim, Ki Hun Park, Hyung-Jun Kwon, Su-Jin Park, Woo Song Lee, and Young Bae Ryu. Tanshinones as selective and slow-binding inhibitors for sars-cov cysteine proteases. *Bioorganic & medicinal chemistry*, 20(19):5928–5935, 2012.
- [68] Arun K Ghosh, Kai Xi, Valerie Grum-Tokars, Xiaoming Xu, Kiira Ratia, Wentao Fu, Katherine V Houser, Susan C Baker, Michael E Johnson, and Andrew D Mesecar. Structure-based design, synthesis, and biological evaluation of peptidomimetic sars-cov 3clpro inhibitors. *Bioorganic & medicinal chemistry letters*, 17(21):5876–5880, 2007.
- [69] Richard Y Kao, Amanda PC To, Louisa WY Ng, Wayne HW Tsui, Terri SW Lee, Hoi-Wah Tsoi, and Kwok-Yung Yuen. Characterization of sars-cov main protease and identification of biologically active small molecule inhibitors using a continuous fluorescence-based assay. *FEBS letters*, 576(3):325–330, 2004.
- [70] Jianmin Zhang, Carly Huitema, Chunying Niu, Jiang Yin, Michael NG James, Lindsay D Eltis, and John C Vederas. Aryl methylene ketones and fluorinated methylene ketones as reversible inhibitors for severe acute respiratory syndrome (sars) 3c-like proteinase. *Bioorganic chemistry*, 36(5):229–240, 2008.
- [71] Hyun Lee, Anuradha Mittal, Kavankumar Patel, Joseph L Gatuz, Lena Truong, Jaime Torres, Debbie C Mulhearn, and Michael E Johnson. Identification of novel drug scaffolds for inhibition of sars-cov 3-chymotrypsin-like protease using virtual and high-throughput screenings. *Bioorganic & medicinal chemistry*, 22(1):167–177, 2014.
- [72] Yi-Ming Shao, Wen-Bin Yang, Tun-Hsun Kuo, Keng-Chang Tsai, Chun-Hung Lin, An-Suei Yang, Po-Huang Liang, and Chi-Huey Wong. Design, synthesis, and evaluation of trifluoromethyl ketones as inhibitors of sars-cov 3cl protease. *Bioorganic & medicinal chemistry*, 16(8):4652–4660, 2008.
- [73] Po-Huang Liang. Characterization and inhibition of sars-coronavirus main protease. *Current topics in medicinal chemistry*, 6(4):361–376, 2006.
- [74] Prasenjit Mukherjee, Prashant Desai, Larry Ross, E Lucile White, and Mitchell A Avery. Structure-based virtual screening against sars-3clpro to identify novel non-peptidic hits. *Bioorganic & medicinal chemistry*, 16(7):4138–4149, 2008.

- [75] Erika Martina, Nikolaus Stiefl, Björn Degel, Franziska Schulz, Alexander Breuning, Markus Schiller, Radim Vicik, Knut Baumann, John Ziebuhr, and Tanja Schirmeister. Screening of electrophilic compounds yields an aziridiny peptide as new active-site directed sars-cov main protease inhibitor. *Bioorganic & medicinal chemistry letters*, 15(24):5365–5369, 2005.
- [76] R Ramajayam, Kian-Pin Tan, Hun-Ge Liu, and Po-Huang Liang. Synthesis, docking studies, and evaluation of pyrimidines as inhibitors of sars-cov 3cl protease. *Bioorganic & medicinal chemistry letters*, 20(12):3569–3572, 2010.
- [77] Lili Chen, Jian Li, Cheng Luo, Hong Liu, Weijun Xu, Gang Chen, Oi Wah Liew, Weiliang Zhu, Chum Mok Pua, Xu Shen, et al. Binding interaction of quercetin-3- $\beta$ -galactoside and its synthetic derivatives with sars-cov 3clpro: structure–activity relationship studies reveal salient pharmacophore features. *Bioorganic & medicinal chemistry*, 14(24):8295–8306, 2006.
- [78] Ulrich Kaeppler, Nikolaus Stiefl, Markus Schiller, Radim Vicik, Alexander Breuning, Werner Schmitz, Daniel Rupprecht, Carsten Schmuck, Knut Baumann, John Ziebuhr, et al. A new lead for nonpeptidic active-site-directed inhibitors of the severe acute respiratory syndrome coronavirus main protease discovered by a combination of screening and docking methods. *Journal of medicinal chemistry*, 48(22):6832–6842, 2005.
- [79] Thi Thanh Hanh Nguyen, Hwa-Ja Ryu, Se-Hoon Lee, Soonwook Hwang, Vincent Breton, Joon Haeng Rhee, and Doman Kim. Virtual screening identification of novel severe acute respiratory syndrome 3c-like protease inhibitors and in vitro confirmation. *Bioorganic & medicinal chemistry letters*, 21(10):3088–3091, 2011.
- [80] Pamela Hamill, Derek Hudson, Richard Y Kao, Polly Chow, Meera Raj, Hongyan Xu, Martin J Richer, and Francois Jean. Development of a red-shifted fluorescence-based assay for sars-coronavirus 3cl protease: identification of a novel class of anti-sars agents from the tropical marine sponge axinella corrugata. 387:1063–1074, 2006.
- [81] Yasuhiro Shimamoto, Yasunao Hattori, Kazuya Kobayashi, Kenta Teruya, Akira Sanjoh, Atsushi Nakagawa, Eiki Yamashita, and Kenichi Akaji. Fused-ring structure of decahydroisoquinolin as a novel scaffold for sars 3cl protease inhibitors. *Bioorganic & medicinal chemistry*, 23(4):876–890, 2015.
- [82] Arun K Ghosh, Kai Xi, Kiira Ratia, Bernard D Santarsiero, Wentao Fu, Brian H Harcourt, Paul A Rota, Susan C Baker, Michael E Johnson, and Andrew D Mesecar. Design and synthesis of peptidomimetic severe acute respiratory syndrome chymotrypsin-like protease inhibitors. *Journal of medicinal chemistry*, 48(22):6767–6771, 2005.
- [83] Shin-ichiro Yoshizawa, Yasunao Hattori, Kazuya Kobayashi, and Kenichi Akaji. Evaluation of an octahydroisochromene scaffold used as a novel sars 3cl protease inhibitor. *Bioorganic & medicinal chemistry*, 28(4):115273, 2020.
- [84] Yan Li, Jinyong Zhang, Ning Wang, Yanjing Zhang, Yongjun Yang, Yue Yuan, Haiming Jing, Xin Liu, Sisi Wu, Ping Luo, et al. High-throughput screening and experimental identification of potent drugs targeting sars-cov-2 main protease. 2020.
- [85] Magne O Sydnes, Yoshio Hayashi, Vinay K Sharma, Takashi Hamada, Usman Bacha, Jennifer Barrila, Ernesto Freire, and Yoshiaki Kiso. Synthesis of glutamic acid and glutamine peptides possessing a trifluoromethyl ketone group as sars-cov 3cl protease inhibitors. *Tetrahedron*, 62(36):8601–8609, 2006.
